## **Protective role of neuronal and lymphoid cannabinoid CB2 receptors in neuropathic pain**

David Cabañero<sup>1</sup>, Angela Ramírez-López<sup>1</sup>, Eva Drews<sup>2</sup>, Anne Schmöle<sup>2</sup>, David M. Otte<sup>2</sup>, Agnieszka Wawrzczak-Bargiela<sup>3</sup>, Hector Huerga Encabo<sup>4</sup>, Sami Kummer<sup>1</sup>, Ryszard Przewlocki<sup>3</sup>, Andreas Zimmer<sup>2</sup> and Rafael Maldonado\*<sup>1,5</sup>

<sup>1</sup> Laboratory of Neuropharmacology, Department of Experimental and Health Sciences, Universitat Pompeu Fabra. Barcelona, Spain.

<sup>2</sup> Institute of Molecular Psychiatry, University of Bonn, Bonn, Germany.

<sup>3</sup> Department of Molecular Neuropharmacology, Institute of Pharmacology, Polish Academy of Sciences. Krakow, Poland.

<sup>4</sup> Immunology Unit, Department of Experimental and Health Sciences, Universitat Pompeu Fabra. Barcelona, Spain.

<sup>5</sup> IMIM (Hospital del Mar Medical Research Institute), Barcelona, Spain.

### **Corresponding author:**

Dr. Rafael Maldonado

Laboratory of Neuropharmacology.

Department of Experimental and Health Sciences.

Universitat Pompeu Fabra. Dr. Aiguader 88. 08003-Barcelona, Spain.

Phone: +34 933 160 824. E-mail: [rafael.maldonado@upf.edu](mailto:rafael.maldonado@upf.edu)

## 1 **Abstract**

2 Cannabinoid CB2 receptor (CB2r) agonists are potential painkillers void of  
3 psychotropic effects. Peripheral immune cells, neurons and glia express CB2r,  
4 however the involvement of CB2r from these cells in neuropathic pain remains  
5 unresolved. We explored spontaneous neuropathic pain through on-demand self-  
6 administration of the selective CB2r agonist JWH133 in wild-type and knockout mice  
7 lacking CB2r in neurons, monocytes or constitutively. Operant self-administration  
8 reflected drug-taking to alleviate spontaneous pain, nociceptive and affective  
9 manifestations. While constitutive deletion of CB2r disrupted JWH133-taking  
10 behavior, this behavior was not modified in monocyte-specific CB2r knockouts and  
11 was increased in mice defective in neuronal CB2r knockouts suggestive of increased  
12 spontaneous pain. Interestingly, CB2r-positive lymphocytes infiltrated the injured  
13 nerve and possible CB2r transfer from immune cells to neurons was found.  
14 Lymphocyte CB2r depletion also exacerbated JWH133 self-administration and  
15 inhibited antinociception. This work identifies a simultaneous activity of neuronal and  
16 lymphoid CB2r that protects against spontaneous and evoked neuropathic pain.

## 17 **Introduction**

18 Cannabinoid CB2 receptor (CB2r) agonists show efficacy in animal models of  
19 chronic inflammatory and neuropathic pain, suggesting that they may be effective  
20 inhibitors of persistent pain in humans (Bie et al., 2018; Maldonado et al., 2016;  
21 Shang and Tang, 2017). However, many preclinical studies assess reflexive-  
22 defensive reactions to evoked nociceptive stimuli and fail to take into account  
23 spontaneous pain, one of the most prevalent symptoms of chronic pain conditions in  
24 humans (Backonja and Stacey, 2004; Mogil et al., 2010; Rice et al., 2018) that  
25 triggers coping responses such as painkiller consumption. As a consequence,  
26 conclusions drawn from animal models relying on evoked nociception may not  
27 translate into efficient pharmacotherapy in humans (Huang et al., 2018; Mogil, 2009;  
28 Percie du Sert and Rice, 2014), which underlines the need to apply more  
29 sophisticated animal models with clear translational value. Operant paradigms in  
30 which animals voluntarily self-administer analgesic compounds can provide high  
31 translatability and also identify in the same experimental approach potential  
32 addictive properties of the drugs (Mogil, 2009; Mogil et al., 2010; O'Connor et al.,  
33 2011). In this line, a previous work using a CB2r agonist, AM1241, showed drug-  
34 taking behavior in nerve-injured rats and not in sham-operated animals, suggesting  
35 spontaneous pain relief and lack of abuse potential of CB2r agonists (Gutierrez et  
36 al., 2011), although the possible cell populations and mechanisms involved remain  
37 unknown. In addition, a recent multicenter study demonstrated off-target effects of  
38 this compound on anandamide reuptake, calcium channels and serotonin, histamine  
39 and kappa opioid receptors (Soethoudt et al., 2017).

40           CB2r, the main cannabinoid receptors in peripheral immune cells (Fernández-  
41 Ruiz et al., 2007; Schmöle et al., 2015a), are found in monocytes, macrophages and  
42 lymphocytes, and their expression increases in conditions of active inflammation  
43 (Schmöle et al., 2015b; Shang and Tang, 2017). The presence of CB2r in the  
44 nervous system was thought to be restricted to microglia and limited to pathological  
45 conditions or intense neuronal activity (Manzanares et al., 2018). However, recent  
46 studies using electrophysiological approaches and tissue-specific genetic deletion  
47 revealed functional CB2r also in neurons, where they modulate dopamine-related  
48 behaviors (Zhang et al., 2014) and basic neurotransmission (Quraishi and Paladini,  
49 2016; Stempel et al., 2016). Remarkably, the specific contribution of immune and  
50 neuronal CB2r to the development of chronic pathological pain has not yet been  
51 established.

52 This work investigates the participation of neuronal and non-neuronal cell  
53 populations expressing CB2r in the development and control of chronic neuropathic  
54 pain. We used a pharmacogenetic strategy combining tissue-specific CB2r deletion  
55 and drug self-administration to investigate spontaneous neuropathic pain.  
56 Constitutive and conditional knockouts lacking CB2r in neurons or monocytes were  
57 nerve-injured, subjected to operant self-administration of the specific CB2r agonist  
58 JWH133 (Soethoudt et al., 2017) and were evaluated for nociceptive and anxiety-  
59 like behavior. We also explored infiltration of CB2r-positive immune cells in the  
60 injured nerve of mice receiving bone marrow transplants from CB2-GFP BAC mice.  
61 Finally, immunological blockade of lymphocyte extravasation was used to



- 62 investigate the effect of this cell type on spontaneous neuropathic pain and its
- 63 involvement on the pain-relieving effects of the cannabinoid CB2r agonist.

## 64 **Results**

### 65 **Self-administration of a CB2r agonist to alleviate spontaneous pain and** 66 **anxiety associated behavior**

67 CB2r agonists have shown efficacy reducing evoked sensitivity and responses of  
68 negative affect in mouse models of chronic pain (Maldonado et al., 2016). Although  
69 antinociception is a desirable characteristic for drugs targeting chronic neuropathic  
70 pain, it is unclear whether the pain-relieving effects of the CB2r agonist would be  
71 sufficient to elicit drug-taking behavior in mice and the cell populations involved. To  
72 answer these questions, mice underwent a PSNL or a sham surgery and were  
73 placed in operant chambers where they had to nose poke on an active sensor to  
74 obtain i.v. self-administration of the CB2r agonist JWH133 or vehicle (Figure 1A).  
75 Sham mice or nerve-injured animals receiving vehicle or the low dose of JWH133  
76 (0.15 mg/kg/inf) did not show significant differences in active nose-poking during the  
77 last 3 days of the drug self-administration period (Figure 1B, Figure 1-figure  
78 supplement 1A). Conversely, nerve-injured mice exposed to the high dose of  
79 JWH133 (0.3 mg/kg/inf) showed higher active responses than sham-operated mice  
80 receiving the same treatment (Figure 1B, Figure 1-figure supplement 1A). As  
81 expected, the operant behavior of sham-operated mice exposed to JWH133 was not  
82 different from that of sham mice exposed to vehicle, suggesting absence of  
83 reinforcing effects of the CB2r agonist in mice without pain (Figure 1B, Figure 1-  
84 figure supplement 1A). The number of nose pokes on the inactive sensor was similar  
85 among the groups, indicating absence of locomotor effects of the surgery or the

86 pharmacological treatments. Thus, operant JWH133 self-administration was  
 87 selectively associated to the neuropathic condition.

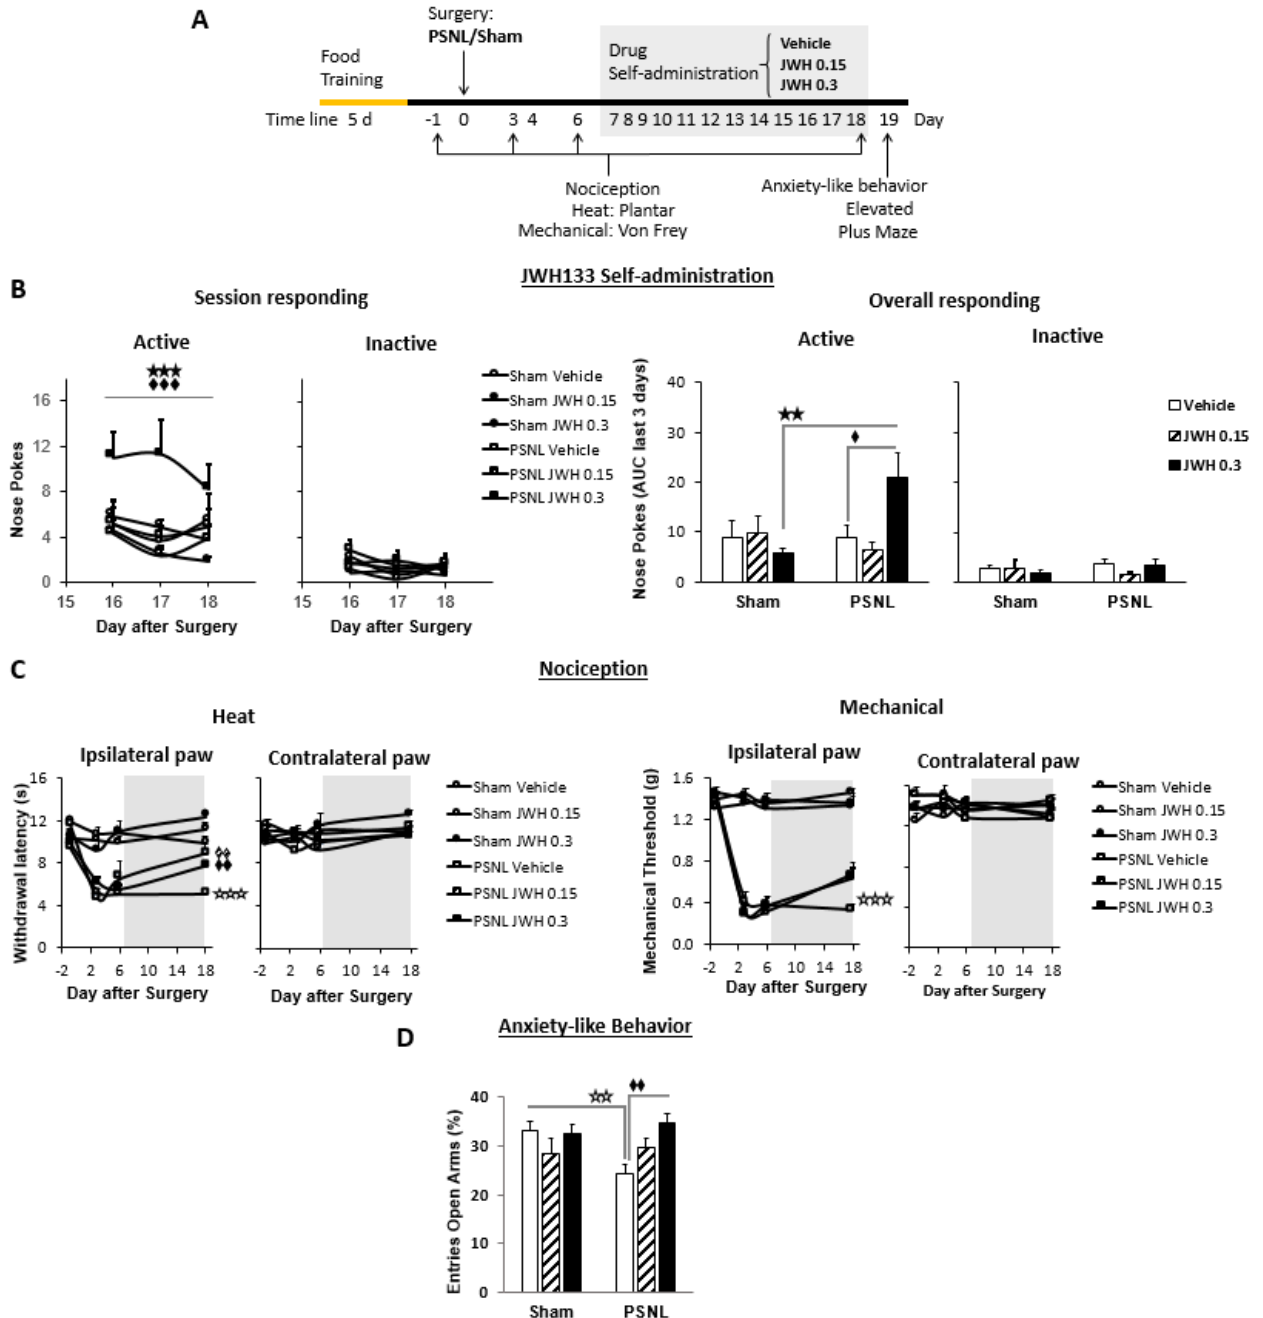

88

89 **Figure 1. C57BL/6J mice self-administer a CB2r agonist with antinocceptive**  
 90 **and anxiolytic-like properties. A)** Timeline of the drug self-administration  
 91 paradigm. Mice were trained in Skinner boxes (5 days, 5d) where nose-poking an

92 active sensor elicited delivery of food pellets. Partial sciatic nerve ligation (PSNL) or  
93 sham surgery were conducted (day 0) followed by jugular catheterization to allow  
94 intravenous (i.v.) drug infusion. From days 7 to 18, mice returned to the operant  
95 chambers and food was substituted by i.v. infusions of JWH133 (0.15 or 0.3  
96 mg/kg/inf.). Mechanical and thermal sensitivity were assessed before (-1) and 3, 6  
97 and 18 days after PSNL using Plantar and von Frey tests. Anxiety-like behaviour was  
98 measured at the end (day 19) with the elevated plus maze. **B)** Nerve-injured mice  
99 poked the active sensor to consume the high dose of JWH133 (0.3 mg/kg/inf.). **C)**  
100 PSNL induced ipsilateral thermal and mechanical sensitization (days 3 and 6).  
101 JWH133 inhibited thermal hypersensitivity but the effect on mechanical nociception  
102 was not significant **D)** Nerve-injured mice receiving vehicle showed decreased  
103 percentage of entries to the open arms of the elevated plus maze, whereas PSNL  
104 mice receiving JWH133 0.3 mg/kg/inf. did not show this alteration. N=5-10 mice per  
105 group. Shaded areas represent drug self-administration. Mean and error bars  
106 representing SEM are shown. Stars represent comparisons vs. sham; diamonds vs.  
107 vehicle. \* $p < 0.05$ ; \*\* $p < 0.01$ ; \*\*\* $p < 0.001$ .

#### Figure 1–figure supplement 1

108 Nociceptive responses to thermal and mechanical stimuli were assessed before and  
109 after the self-administration period (days -1, 3, 6 and 18). Before the treatment with  
110 the CB2r agonist, all nerve-injured mice developed heat and mechanical  
111 hypersensitivity in the ipsilateral paw (Figure 1C). After self-administration (shaded  
112 area, Figure 1C) mice exposed to JWH133 showed a significant reduction in heat  
113 hypersensitivity (Figure 1C, day 18, ipsilateral paw), although the alleviation of  
114 mechanical hypersensitivity did not reach statistical significance in this experiment.  
115 No significant drug effects were observed in the contralateral paws.

116 We also studied affective-like behavior in mice exposed to this chronic pain  
117 condition. Anxiety-like behavior was enhanced in nerve-injured mice treated with  
118 vehicle, as these mice visited less frequently the open arms of the elevated plus  
119 maze (Figure 1D). This emotional response was absent in nerve-injured mice  
120 repeatedly exposed to the high dose of JWH133 (Figure 1D). Therefore, the high  
121 dose of JWH133 elicited a drug-taking behavior selectively associated to  
122 spontaneous pain relief, and had efficacy limiting the pronociceptive effects of the  
123 nerve injury and its emotional-like consequences.

#### 124 **CB2 receptor mediates JWH133 effects on spontaneous pain alleviation**

125 JWH133 has been recently recommended as a selective CB2r agonist to study the  
126 role of CB2r in biological and disease processes due to its high selectivity for this  
127 receptor (Soethoudt et al., 2017). To investigate the specificity of the CB2r agonist  
128 in our model, the high dose of JWH133 (0.3 mg/kg/inf) was offered to nerve-injured  
129 mice constitutively lacking the CB2r (CB2KO) and to C57BL/6J wild-type mice.  
130 CB2KO mice showed a significant disruption of JWH133-taking behavior on the last  
131 sessions of the drug self-administration period (Figure 2A, Figure 2-figure  
132 supplement 1A). Overall discrimination between the active and inactive sensors was  
133 also significantly blunted in CB2KO mice (Source Data File) and inactive nose pokes  
134 were similar in both groups of mice, indicating absence of genotype effect on  
135 locomotion (Figure 2A, Figure 2-figure supplement 1A). The disruption of drug-taking  
136 behavior shown in CB2KO mice was accompanied by an inhibition of JWH133  
137 effects on nociceptive and affective behavior (Figure 2B, Figure 2C).

138

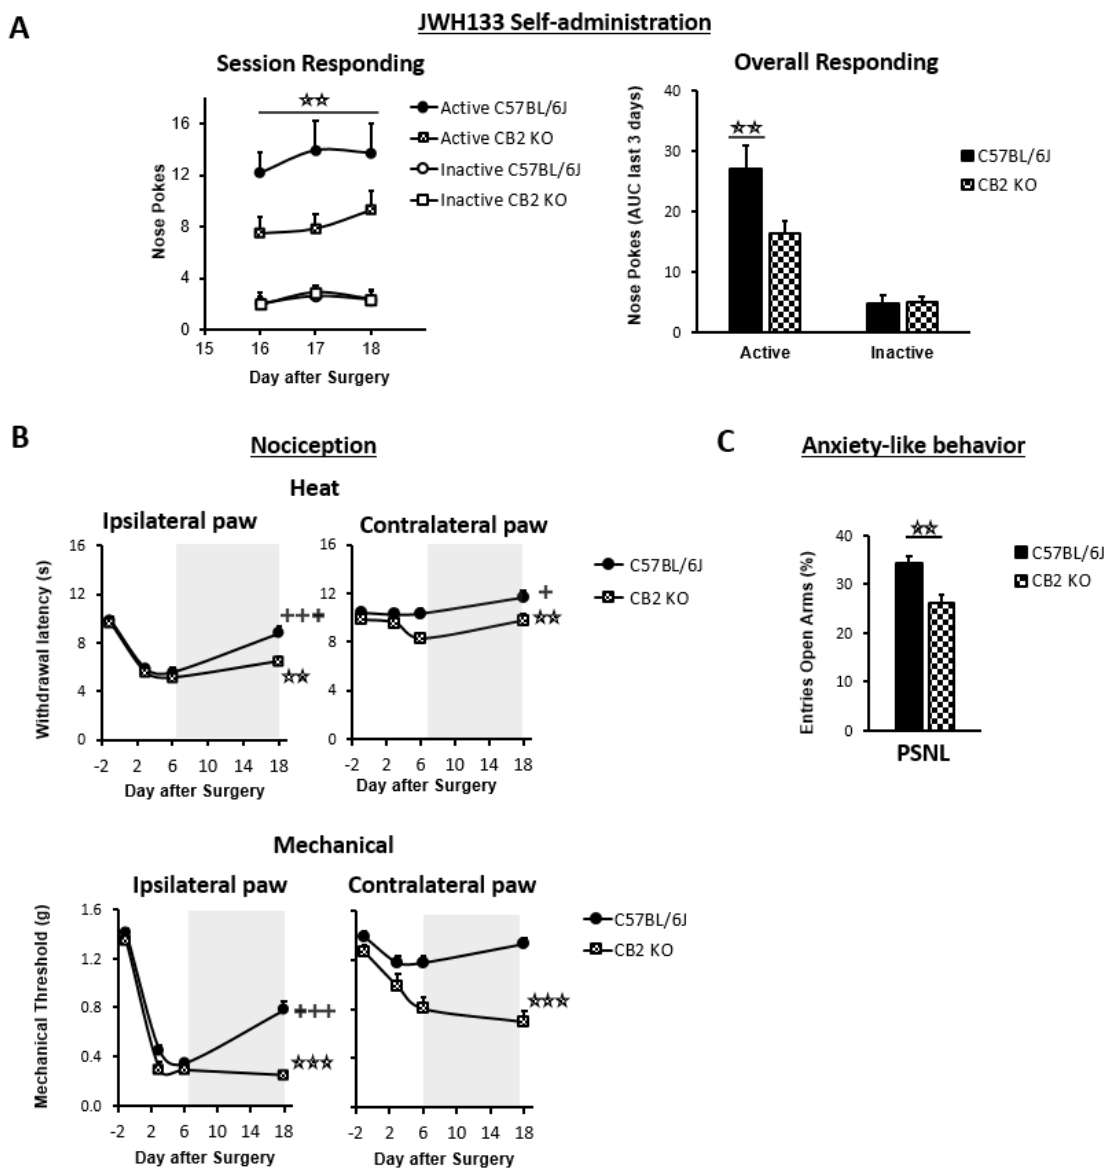

139

140 **Figure 2. Nerve-injured mice constitutively lacking CB2r show disruption of**  
 141 **JWH133 intake and blunted effects of the drug.** CB2r constitutive knockout mice  
 142 (CB2 KO) and C57BL/6J mice were food-trained in Skinner boxes (Food training, 5  
 143 days), subjected to a partial sciatic nerve ligation (PSNL, day 0), catheterized and  
 144 exposed to high doses of the CB2r agonist JWH133 (0.3 mg/kg/inf., days 7 to 18).  
 145 Nociceptive sensitivity to heat (Plantar) and mechanical (von Frey) stimulation were  
 146 measured before and after the nerve injury (-1,3,6,18), and anxiety-like behaviour  
 147 was evaluated at the end (day 19). **A**) CB2 KO mice showed decreased active  
 148 operant responding for the CB2r agonist. **B**) The effects of JWH133 on thermal

149 nociception were reduced in constitutive knockout mice. CB2 KO mice showed  
150 contralateral mechanical and thermal sensitization and complete abolition of  
151 JWH133 effects on mechanical hypersensitivity. **C**) Anxiety-like behaviour after the  
152 treatment worsened in CB2 KO mice. N=16-19 mice per group. Mean and error bars  
153 representing SEM are shown. Shaded areas represent drug self-administration.  
154 Stars represent comparisons vs. C57BL/6J mice; crosses represent day effect.  
155 \* $p < 0.05$ ; \*\* $p < 0.01$ ; \*\*\* $p < 0.001$ .

#### Figure 2–figure supplement 1

156 CB2KO and C57BL/6J mice developed similar thermal and mechanical  
157 hypersensitivity in the injured paw (Figure 2B, day 6, Ipsilateral paw), although  
158 CB2KO mice also developed hypersensitivity in the contralateral paw, as previously  
159 described (Racz et al., 2008). While C57BL/6J mice showed significant recovery of  
160 thermal and mechanical thresholds after JWH133 self-administration (Figure 2B, day  
161 18), CB2KO mice showed no effects of the treatment on mechanical sensitivity  
162 (Figure 2B, day 18, Mechanical) and a partial recovery of the thresholds to heat  
163 stimulation (Figure 2B, day 18, Heat). Contralateral mechanical sensitization was  
164 still present in CB2KO mice exposed to the CB2r agonist (Figure 2B, Contralateral  
165 paw). Likewise, nerve-injured C57BL/6J mice showed less anxiety-like behavior  
166 after JWH133 self-administration than CB2KO mice (Figure 2C), suggesting that  
167 these anxiolytic-like effects of JWH133 are mediated by CB2r. Hence, CB2KO mice  
168 showed reduced drug-taking behavior accompanied by blunted inhibition of JWH133  
169 effects on mechanical nociception and anxiety-like behavior, confirming mediation  
170 of these effects by CB2r.

171 **Participation of neuronal and monocyte CB2r in neuropathic pain**  
172 **symptomatology**

173 CB2r were initially described in peripheral immune cells (Munro et al., 1993),  
174 although they have been found in multiple tissues including the nervous system. In  
175 order to distinguish the participation of CB2r from different cell types on spontaneous  
176 neuropathic pain, we conducted the self-administration paradigm in nerve-injured  
177 mice lacking CB2r in neurons (Syn Cre<sup>+</sup> mice) or in monocyte-derived cells (LysM  
178 Cre<sup>+</sup>) and in their wild-type littermates (Cre Neg). Syn Cre<sup>+</sup> mice showed increased  
179 active operant responding for JWH133 (Figure 3A, Figure 3-figure supplement 1A),  
180 suggesting increased spontaneous pain and possible decrease of drug effects. On  
181 the other hand, LysM Cre<sup>+</sup> mice did not show significant alteration of drug-taking  
182 behavior (Figure 3A, Figure 3-figure supplement 1A). Inactive responding was also  
183 similar between Cre Neg and knockout mice. Thus, data from the drug self-  
184 administration experiments showed persistence of drug effects in the different  
185 genotypes and increased self-administration in mice lacking neuronal CB2r,  
186 suggestive of increased spontaneous pain.

187 We also measured antinociceptive and anxiolytic-like effects of JWH133 self-  
188 administration (Figure 3B, Figure 3C). The three mouse lines showed similar evoked  
189 responses to nociceptive stimulation after nerve injury (Figure 3B). A slight but  
190 significant impairment on the effect of JWH133 on mechanical sensitivity was found  
191 in Syn Cre<sup>+</sup> mice (Figure 3C) in spite of the increased JWH133 consumption,  
192 compatible with reduced efficacy of JWH133 in this mouse strain. The assessment  
193 of anxiety-like behavior did not reveal apparent differences among the three



194 genotypes (Figure 3C). Thus, the increased JWH133 consumption observed in Syn  
 195 Cre+ mice was not reflected in increased anxiolysis and JWH133 antinociceptive  
 196 effects were blunted, suggesting partial involvement of neuronal CB2r in the  
 197 development of spontaneous and evoked neuropathic pain.

### A JWH133 Self-administration

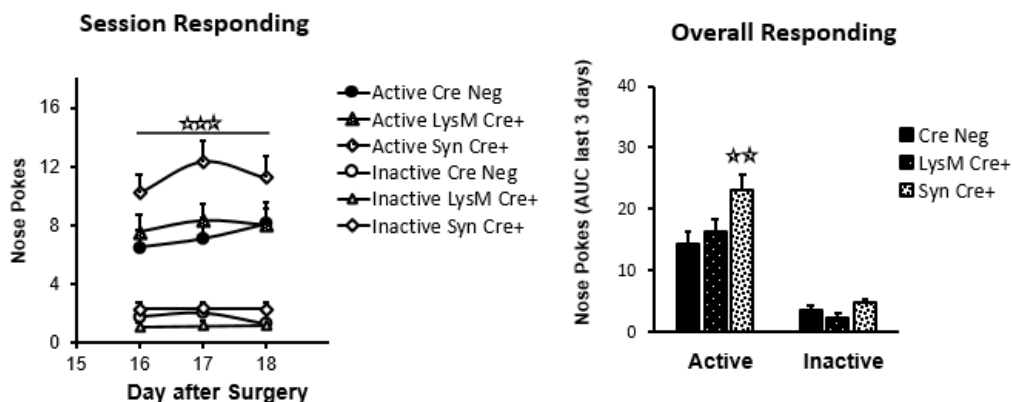

### B Nociception

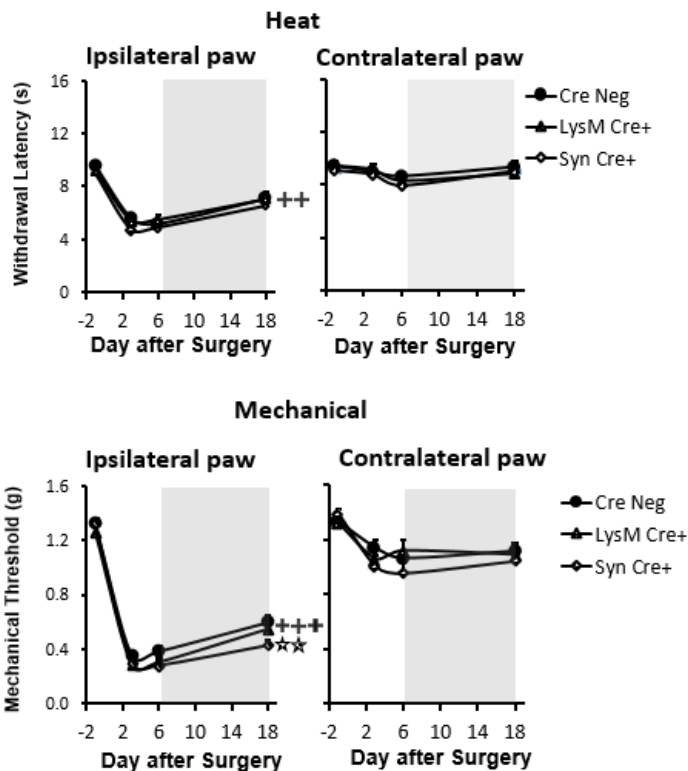

### C Anxiety-like behavior

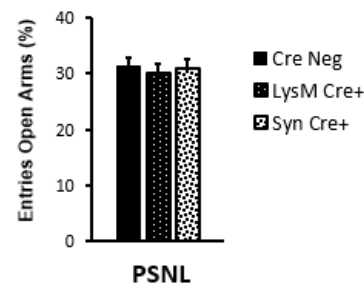

198

199 **Figure 3. Nerve-injured mice defective in neuronal CB2r show increased self-**  
200 **administration of the CB2r agonist JWH133 and a decrease in the**  
201 **antinociceptive effects of the drug.** Mice lacking CB2r in neurons (Syn Cre+), in  
202 monocytes (LysM Cre+) or their wild-type littermates (Cre Neg) were food-trained in  
203 Skinner boxes (Food training, 5 days), subjected to partial sciatic nerve ligation  
204 (PSNL, day 0), catheterized and exposed to JWH133 (0.3 mg/kg/inf., days 7 to 18).  
205 Nociceptive sensitivity to heat (Plantar) and mechanical (von Frey) stimulation were  
206 measured before and after nerve injury (-1,3,6,18), anxiety-like behaviour was  
207 evaluated at the end (day 19). **A)** Syn Cre+ mice showed increased active operant  
208 responding for JWH133 in the last sessions of the self-administration period **B)** All  
209 mouse strains showed decreased heat nociception after JWH133 treatment, and  
210 Syn Cre+ mice showed reduced effects of JWH133 on mechanical nociception. **C)**  
211 Every mouse strain showed similar anxiety-like behavior after JWH133 self-  
212 administration. No significant differences were found between LysM Cre+ and Cre  
213 Neg mice. N=18-36 mice per group. Mean and error bars representing SEM are  
214 shown. Shaded areas represent drug self-administration. Stars represent  
215 comparisons vs. Cre Neg mice; crosses represent day effect. \*p<0.05; \*\*p<0.01;  
216 \*\*\*p<0.001.

Figure 3–figure supplement 1

217

### 218 **Infiltration of non-neuronal CB2r-GFP+ cells in the injured nerve.**

219 The persistence of JWH133 effects after genetic deletion of CB2r from neurons and  
220 monocyte-derived cells led us to hypothesize that CB2r of other cell types may still  
221 exert neuromodulatory effects. To investigate possible infiltration of non-neuronal  
222 GFP+ cells in the injured nerve, we transplanted bone marrow cells from C57BL/6J  
223 or CB2r-GFP BAC mice to lethally irradiated C57BL/6J recipient mice (Figure 4-  
224 figure supplement 1). Mice transplanted with bone marrow from CB2r-GFP mice

225 (CB2r-GFP BMT) or from C57BL/6J mice (C57BL/6J BMT) were exposed to a partial  
226 sciatic nerve ligation or a sham surgery and dorsal root ganglia were collected 14  
227 days later. A significant infiltration of non-neuronal GFP+ cells was revealed in nerve  
228 injured CB2r-GFP BMT mice (~34 cells/mm<sup>2</sup>, Figure 4A, Figure 4-figure supplement  
229 2), indicating that CB2r-expressing cells invaded the injured nerve. Immunostaining  
230 to identify these cell types revealed co-localization with macrophage and lymphocyte  
231 markers. Nearly 60% of infiltrating macrophages and around 40% of the lymphocytes  
232 were found to be GFP+ (Figure 4B, Figure 4C, Figure 4-figure supplement 3).  
233 Surprisingly, a significant percentage of neurons was also found to express GFP in  
234 CB2r-GFP BMT mice (Figure 4D). The percentage of GFP+ neurons was higher in  
235 nerve-injured mice (~4% of total neurons) than in sham-operated animals (~2%,  
236 Figure 4D, Figure 4-figure supplement 4). Since GFP could only come from bone-  
237 marrow transplanted cells, this finding suggests a transfer of CB2r from bone-  
238 marrow derived cells to neurons. Hence, nerve injury facilitated the invasion of  
239 affected ganglia by CB2r-positive immune cells and promoted a neuronal GFP  
240 expression compatible with transfer of CB2r from immune cells to neurons.

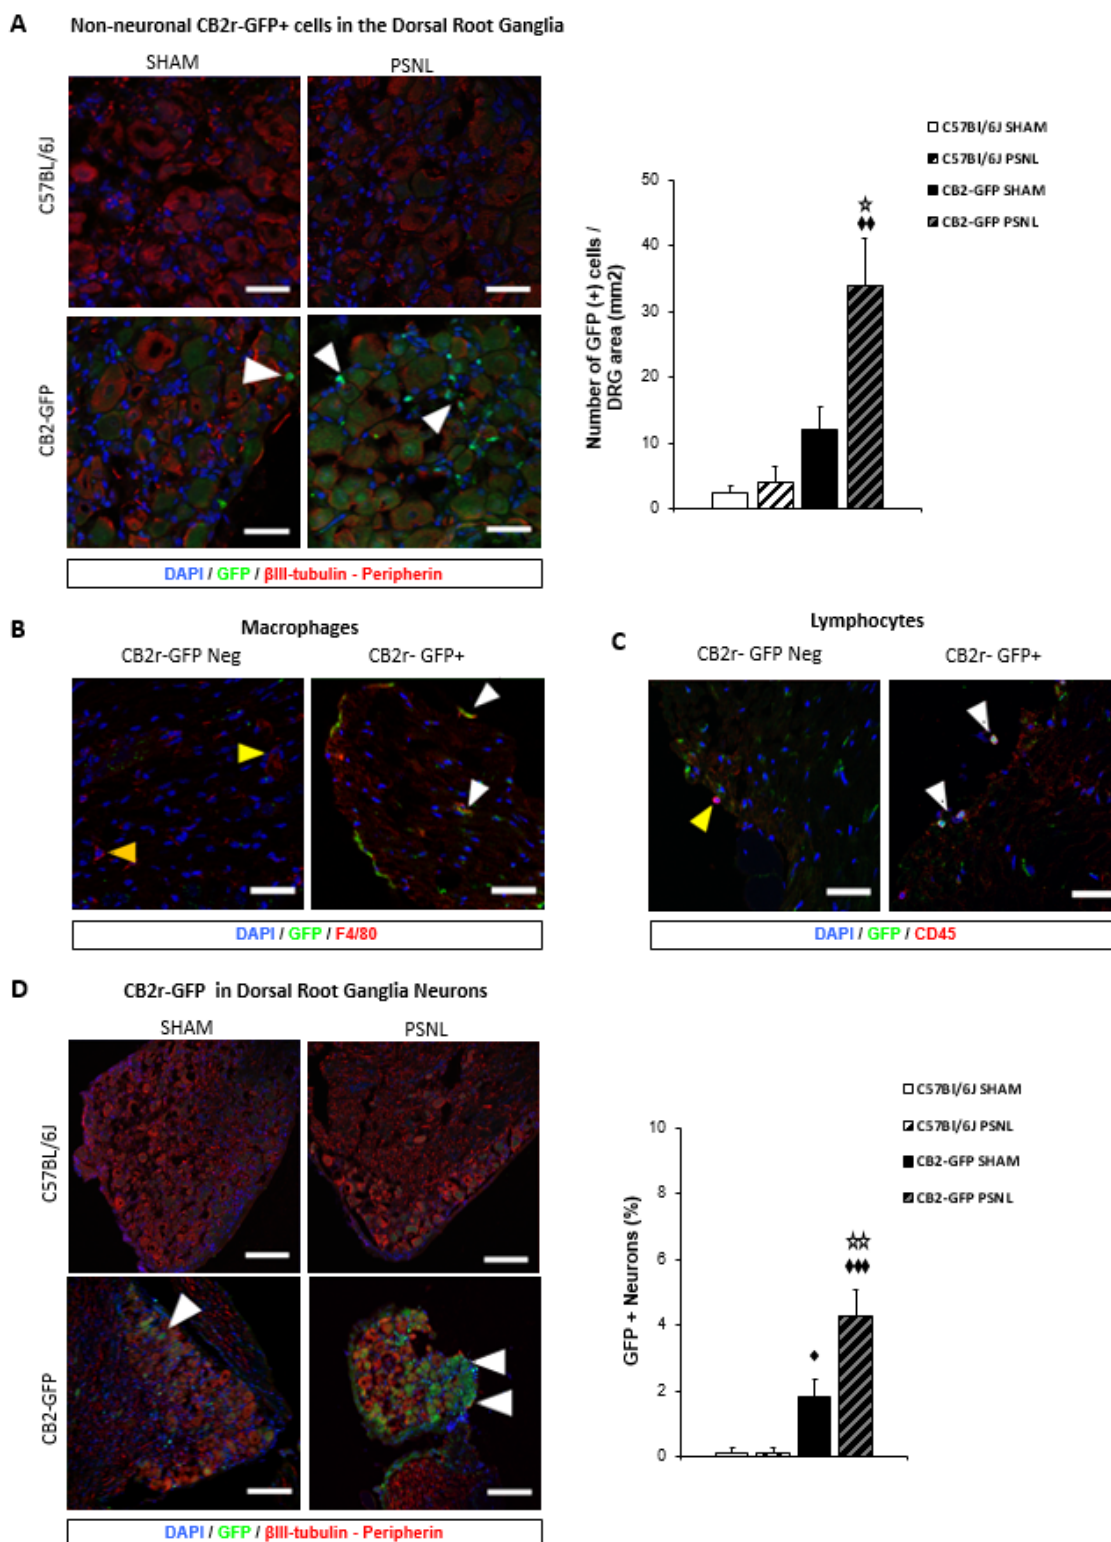

244 **peripheral neurons.** The figure shows images of L3-L5 dorsal root ganglia from  
245 sham (SHAM) or nerve-injured mice (PSNL) transplanted with bone marrow cells  
246 from CB2 GFP BAC mice (CB2-GFP) or C57BL6/J mice (C57BL6/J). **A, D)** Dorsal  
247 root ganglia sections stained with the nuclear marker DAPI, anti-GFP, and neuronal  
248 markers anti- $\beta$ -III tubulin and anti-peripherin. **A)** CB2-GFP mice showed significant  
249 infiltration of GFP+ bone marrow-derived cells after the nerve injury, whereas sham  
250 or nerve-injured C57BL6/J mice did not show significant GFP immunoreactivity.  
251 Split channels in Figure 4-figure supplement 2. **B)** Co-localization of CB2-GFP and  
252 the macrophage marker anti-F4/80. Co-staining with anti-GFP and anti-F4/80  
253 revealed GFP+ (~60%) and GFP negative macrophages infiltrating the injured  
254 nerve. Split channels in Figure 4-figure supplement 3A. **C)** Co-staining with anti-GFP  
255 and anti-CD45 revealed GFP+ (~40%) and GFP negative lymphocytes infiltrating the  
256 injured nerve. Split channels in Figure 4-figure supplement 3B. **D)** CB2-GFP mice  
257 showed a percentage of GFP+ neurons that was enhanced with the nerve injury.  
258 Scale bar, 140  $\mu$ m. Split channels in Figure 4-figure supplement 4. Scale bar for B),  
259 C), D), 45  $\mu$ m. Yellow arrows point to GFP negative cells and white arrows to GFP+  
260 cells. A certain degree of image processing has been applied equally across the  
261 entire merged images for optimal visualization. N=2-3 mice per group. Means and  
262 error bars representing SEM are shown. Stars represent comparisons vs. sham;  
263 diamonds vs. C57BL6/J. \* $p$ <0.05, \*\* $p$ <0.01, \*\*\* $p$ <0.001.

Figure 4-figure supplement 1

Figure 4-figure supplement 2

Figure 4-figure supplement 3

Figure 4-figure supplement 4

264

## 265 **Lymphocyte involvement on JWH133 efficacy**

266 The discovery of CB2r-expressing lymphocytes invading the dorsal root ganglia of  
267 nerve-injured mice prompted us to investigate the role of this cell type in  
268 spontaneous neuropathic pain. To answer this question C57BL/6J mice were

269 repeatedly treated with a control IgG or with an antibody targeting intercellular  
270 adhesion molecule 1 (ICAM1), a protein required for lymphocyte extravasation  
271 (Labuz et al., 2009). Mice under treatment with anti-ICAM-1 or with the control IgG  
272 were exposed to JWH133 self-administration. Instead of reducing the intake of the  
273 CB2r agonist, anti-ICAM1 significantly increased active nose poking to obtain i.v.  
274 JWH133 without altering the inactive nose poking (Figure 5A, Figure 5-figure  
275 supplement 1A), suggesting increased spontaneous pain. This result is in agreement  
276 with previous works showing protection against chronic inflammatory and  
277 neuropathic pain mediated by lymphoid cells (Labuz et al., J Clin Invest 2009;  
278 Baddack-Werncke et al., J Neuroinflammation 2017). Interestingly, thermal and  
279 mechanical nociception before self-administration were similar in anti-ICAM1 and  
280 control IgG-treated mice (Figure 5B). After self-administration, the alleviation of  
281 thermal sensitivity was similar in control IgG and anti-ICAM1-treated mice (Figure  
282 5B), but mice treated with anti-ICAM1 also showed an abolition of the antinociceptive  
283 effect of JWH133 on mechanical sensitivity (Figure 5B). This was evident in spite of  
284 the increased drug-taking behavior shown by mice treated with anti-ICAM1 (Figure  
285 5A), which reveals decreased antinociceptive efficacy of JWH133 in these mice. On  
286 the contrary, anxiety-like behavior was similar in Control IgG and anti-ICAM1 mice  
287 (Figure 5C). To confirm an effect of the antibody treatment on lymphocyte infiltration,  
288 RT-PCR for white blood cell markers was performed in the dorsal root ganglia of  
289 mice subjected to the behavioral paradigm. As expected, a significant decrease in T  
290 cell markers CD2 and CD4 was observed in mice treated with anti ICAM-1 (Figure  
291 5D, T cell panel). Interestingly, anti ICAM-1 also showed a pronounced increase in  
292 B cell marker CD19 (Figure 5D) and no alteration of the macrophage marker C1q

293 (Figure 5D). Hence, our results reveal that lymphoid cells are involved in  
 294 spontaneous neuropathic pain and are also necessary for the antinociceptive effect  
 295 of JWH133 on mechanical sensitivity.

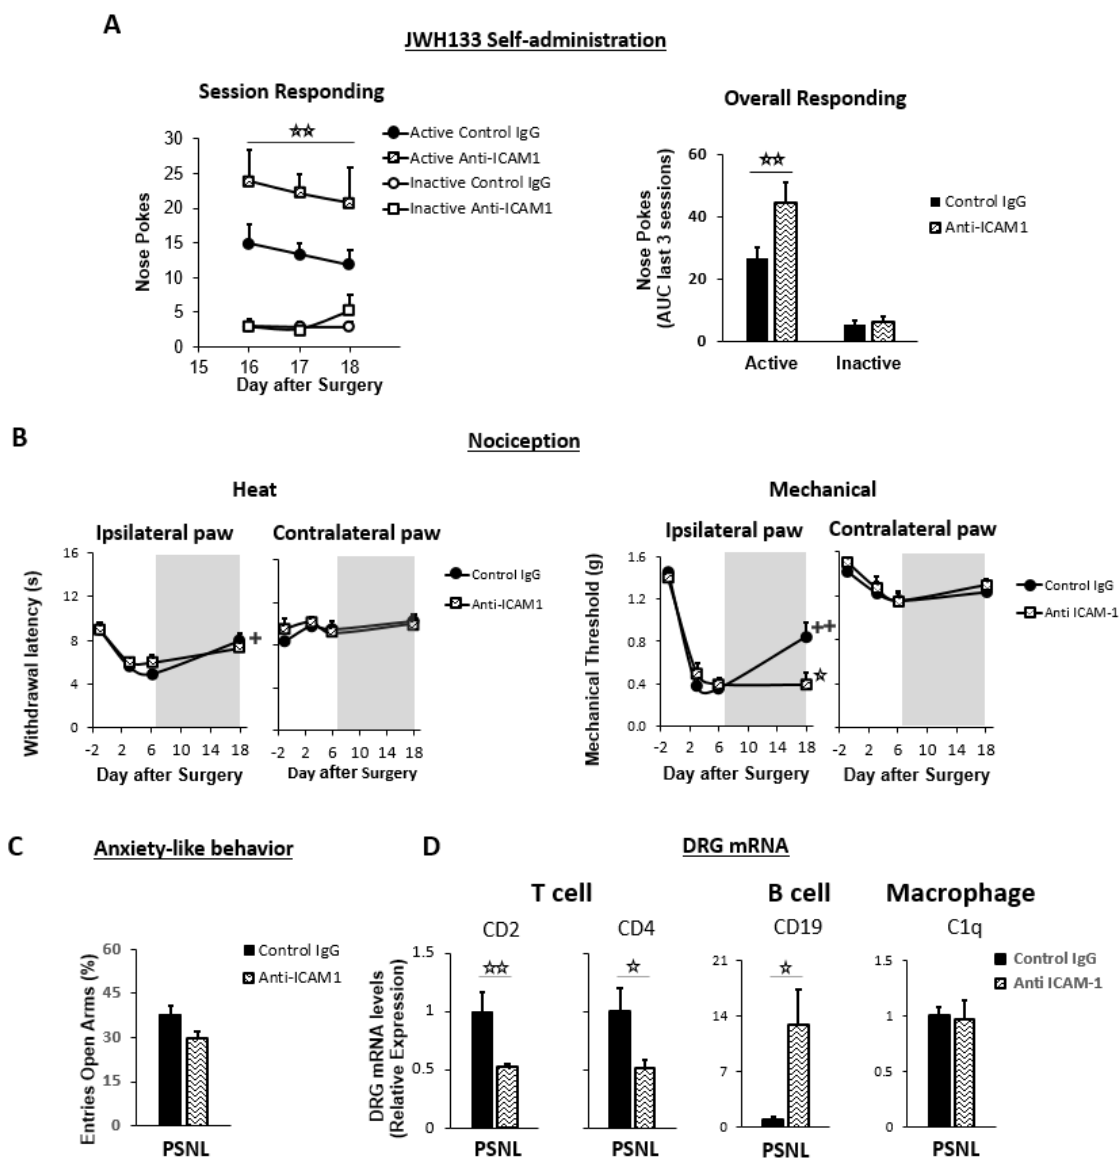

296

297 **Figure 5. Lymphocytes modulate the effects of JWH133 on spontaneous pain**  
 298 **and mechanical nociception.** C57BL/6J mice were food-trained in Skinner boxes  
 299 (Food training, 5 days), subjected to partial sciatic nerve ligation (PSNL, day 0),  
 300 catheterized and exposed to high doses of the CB2r agonist JWH133 (0.3 mg/kg/inf.,  
 301 days 7 to 18). Treatments with Anti-ICAM1 (an antibody that inhibits lymphocyte



302 extravasation) or control IgG were given intraperitoneally once a day from day 0 until  
303 the end of self-administration. Nociceptive sensitivity to heat (Plantar) and  
304 mechanical (von Frey) stimulation was measured before and after nerve injury (-  
305 1,3,6,18), and anxiety-like behaviour was evaluated at the end (day 19). Dorsal root  
306 ganglia were collected for mRNA analysis **A)** Mice treated with anti-ICAM1 showed  
307 increased active responding for JWH133. **B)** Thermal nociception after JWH133 self-  
308 administration was similar in mice treated with anti-ICAM1 or control IgG.  
309 Conversely, JWH133 effects on mechanical nociception were abolished by anti-  
310 ICAM1. **C)** Anxiety-like behaviour was similar in anti-ICAM1 and control IgG mice. **D)**  
311 Levels of mRNA from T cell markers CD2 and CD4 were decreased in the dorsal  
312 root ganglia of anti-ICAM1 mice. Conversely, levels of B cell marker CD19 increased.  
313 Macrophage marker C1q was unaffected. N=6-7 mice per group. Shaded areas  
314 represent drug self-administration. Mean and error bars representing SEM are  
315 shown. Stars represent comparisons vs. control IgG group; crosses indicate day  
316 effect. \* $p < 0.05$ ; \*\* $p < 0.01$ ; \*\*\* $p < 0.001$ .

Figure 5–figure supplement 1



## 317 **Discussion**

318 This work shows a protective function of CB2r from neurons and lymphocytes on  
319 spontaneous neuropathic pain and the involvement of these cell populations in CB2-  
320 induced antinociception, as revealed by increased self-administration of the CB2r  
321 agonist JWH133 in mice defective in lymphocyte and neuronal CB2r. Previous works  
322 already demonstrated antinociceptive and emotional-like effects of CB2r agonists in  
323 rodent models of acute and chronic pain (Gutierrez et al., 2011; Ibrahim et al., 2003;  
324 Jafari et al., 2007; La Porta et al., 2015; Maldonado et al., 2016). Our results provide  
325 evidence that the effect of the CB2r agonist is sufficient to promote drug-taking  
326 behavior in nerve-injured mice for alleviation of spontaneous pain, but it is void of  
327 reinforcing effects in animals without pain, suggesting the absence of abuse liability.  
328 This absence of reinforcement adds value to the modulation of pain through CB2r  
329 agonists, since current available agents for neuropathic pain treatment have reduced  
330 efficacy and often show addictive properties in humans and rodents (Attal and  
331 Bouhassira, 2015; Bonnet and Scherbaum, 2017; Bura et al., 2018; Finnerup et al.,  
332 2015; Hipolito et al., 2015; O'Connor et al., 2011).

333 A previous work using the CB2r agonist AM1241 showed drug-taking behavior and  
334 antinociception in nerve-injured rats (Gutierrez et al., 2011), although a recent  
335 multicenter study demonstrated off-target effects of this drug (Soethoudt et al.,  
336 2017). The disruption of JWH133 effects observed in constitutive knockout mice  
337 confirms that the relief of spontaneous pain and the effects reducing mechanical  
338 nociception and anxiety-like behavior are mediated by CB2r stimulation. However  
339 the CB2r agonist partially preserved its effects promoting drug self-administration

340 and relieving thermal hypersensitivity in CB2KO mice, suggesting that JWH133 may  
341 also act through other receptors. JWH133 has shown effects interacting with the  
342 Transient Receptor Potential Ankyrin1 (TRPA1) (Soethoudt et al., 2017), a receptor  
343 needed for thermal pain perception (Vandewauw et al., 2018), that could participate  
344 in these responses.

345 Nerve-injured mice defective in neuronal CB2r showed higher JWH133 intake than  
346 wild-type littermates, indicating persistence of drug effects and increased  
347 spontaneous pain when neurons do not express CB2r. Importantly, mechanical and  
348 thermal neuropathic hypersensitivity before drug self-administration were similar in  
349 neuronal knockouts and their wild-type littermates, which suggests different  
350 mechanisms of spontaneous pain and evoked nociception. In addition, mechanical  
351 nociception measured after JWH133 was more severe in neuronal CB2r knockouts  
352 than in wild-type littermates, which indicates decreased JWH133 efficacy on  
353 mechanical antinociception. Several studies described the presence of CB2r mRNA  
354 and functional CB2r in neuronal populations from different areas of the brain  
355 (Stempel et al., 2016; Zhang et al., 2014). However, other works using targeted  
356 expression of fluorescent proteins under the control of the mouse gene *Cnr2* failed  
357 to describe CB2r expression in neurons (López et al., 2018; Schmöle et al., 2015a).  
358 Our results agree with a role of neuronal CB2r during painful neuroinflammatory  
359 conditions, a setting that was not studied before in mice defective in neuronal CB2r.  
360 Thermal hypersensitivity and anxiety-like behavior measured after self-  
361 administration was similar in neuronal knockouts and wild-type mice, which indicates  
362 involvement of non-neuronal cell populations. However, it should also be considered

363 that the neuronal knockout mice had higher JWH133 consumption. Thus, a possible  
364 lack of efficacy could also be present for thermal antinociception and inhibition of  
365 anxiety-like behavior. Although a neuronal involvement was found, CB2r neuronal  
366 knockouts did not recapitulate the phenotype of mice constitutively lacking CB2r,  
367 suggesting additional cell types involved in the effects of CB2r agonists.

368 We investigated the effects of JWH133 promoting its own consumption and inducing  
369 antinociception and anxiolysis in CB2r LysM Cre<sup>+</sup> mice, mainly lacking CB2r in  
370 monocytes, the precursors of microglial cells. We did not observe a microglial  
371 participation in these pain-related phenotypes, which may be due to an incomplete  
372 deletion of CB2r in microglia through LysM-driven Cre expression (Blank and Prinz,  
373 2016). Previous studies in mice constitutively lacking CB2r described an  
374 exacerbated spinal cord microgliosis after nerve injury (Nozaki et al., 2018; Racz et  
375 al., 2008), which suggested a relevant role of CB2r controlling glial reactivity. Since  
376 spinal microgliosis participates in the increased pain sensitivity after a neuropathic  
377 insult and macrophages and microglia express CB2r, blunted effects of JWH133  
378 were expected in microglial CB2r knockouts. However, monocyte-derived cells did  
379 not seem to be involved in the analgesic effects mediated by the exogenous  
380 activation of CB2r in these experimental conditions.

381 The immunohistochemical analysis of dorsal root ganglia from mice  
382 transplanted with bone marrow cells of CB2r GFP BAC mice (Schmöle et al., 2015a)  
383 revealed a pronounced infiltration of immune cells expressing CB2r in the dorsal root  
384 ganglia after nerve injury. Macrophages and lymphocytes expressing CB2r were  
385 found at a time point in which nerve-injured mice present mechanical and thermal

386 hypersensitivity and self-administer compounds with demonstrated analgesic  
387 efficacy (Bura et al., 2013, 2018). Interestingly, GFP expression was also found in  
388 neurons, suggesting a transfer of CB2r from peripheral immune cells to neurons. An  
389 explanation for this finding may come from processes of cellular fusion or transfer of  
390 cargo between peripheral blood cells and neurons (Alvarez-Dolado et al., 2003;  
391 Ridder et al., 2014). Bone marrow-derived cells fuse with different cell types in a  
392 process of cellular repair that increases after tissue damage. These events may be  
393 particularly important for the survival of neurons with complex structures that would  
394 otherwise be impossible to replace (Giordano-Santini et al., 2016). Alternatively,  
395 extracellular vesicles drive intercellular transport between immune cells and neurons  
396 (Budnik et al., 2016). Earlier studies showed incidence of fusion events between  
397 bone marrow-derived cells and peripheral neurons in a model of diabetic neuropathy  
398 (Terashima et al., 2005), and similar processes were observed in central neurons  
399 after peripheral inflammation (Giordano-Santini et al., 2016; Ridder et al., 2014).  
400 Functional contribution of these mechanisms to neuronal CB2r expression has not  
401 yet been explored, although cargo transfer between immune cells and neurons  
402 could modify neuronal functionality and it could offer novel therapeutic approaches  
403 to modulate neuronal responses (Budnik et al., 2016). Hence, CB2r coming from  
404 white blood cells and present in neurons could be significant modulators of  
405 spontaneous neuropathic pain and may be contributors to the analgesic effect of  
406 CB2r agonists.

407 Our results suggest participation of lymphoid cells on spontaneous neuropathic pain,  
408 but not on basal neuropathic hypersensitivity, highlighting possible differences on

409 the pathophysiology of these nociceptive manifestations. In addition, lymphoid cells  
410 were essential for the effects of JWH133 alleviating mechanical sensitivity after a  
411 nerve injury. These hypotheses were evaluated by using anti-ICAM1 antibodies that  
412 impair lymphocyte extravasation. Previous studies revealed that anti-ICAM1  
413 treatment inhibited opioid-induced antinociception in a model of neuropathic pain  
414 (Celik et al., 2016; Labuz et al., 2009). According to the authors, stimulation of opioid  
415 receptors from the immune cells infiltrating the injured nerve evoked the release of  
416 opioid peptides that attenuated mechanical hypersensitivity. Lymphocyte CB2r could  
417 also be involved in the release of leukocyte-derived pain-modulating molecules.  
418 Experiments assessing the function of ICAM1 (Celik et al., 2016; Deane et al., 2012;  
419 Labuz et al., 2009) showed the participation of this protein on lymphocyte  
420 extravasation. In agreement, we observed a decrease of T cell markers in the dorsal  
421 root ganglia of mice receiving anti-ICAM1. Anti-ICAM1 treatment also increased the  
422 mRNA levels of the B cell marker CD19 in the dorsal root ganglia. Since ICAM1-  
423 interacting T cells show activity limiting B cell populations (Deane et al., 2012; Zhao  
424 et al., 2006), it is likely that the absence of T cells in the nervous tissue increased  
425 infiltration of B lymphocytes. B cells are involved in the severity of neuroinflammatory  
426 processes and have been linked to pain hypersensitivity (Huang et al., 2016; Jiang  
427 et al., 2016; Li et al., 2014; Zhang et al., 2016). Interestingly, CB2r restrict glucose  
428 and energy supply of B cells (Chan et al., 2017), which may alter their cytokine  
429 production as previously described for macrophages and T cells. However, the  
430 participation of CB2r from B cells on neuropathic pain has not yet been established.  
431 Our results indicate an increase in JWH133 consumption that could be driven by an  
432 increased infiltration of B cells. Overall, the results with the ICAM-1 experiment

433 suggest a relevant participation of lymphoid CB2r on painful neuroinflammatory  
434 responses.

435 In summary, the contribution of neurons and lymphocytes to the effects of CB2r  
436 agonists on spontaneous and evoked pain suggests a coordinated response of both  
437 cell types after the nerve injury. CB2r-expressing lymphocytes could participate in  
438 pain sensitization through release of pain-related molecules and the observed  
439 responses are also compatible with transfer of CB2r between immune cells and  
440 neurons. Hence, bone-marrow derived cells may provide a source of functional CB2r  
441 that was not considered before and could clarify the controversial presence of these  
442 receptors in neurons. Nociceptive and affective manifestations of chronic  
443 neuropathic pain are therefore orchestrated through neuronal and immune sites  
444 expressing CB2r, highlighting the functional relevance of this cannabinoid receptor  
445 in different cell populations.

446 Our results on operant JWH133 self-administration depict CB2r agonists as  
447 candidate painkillers for neuropathic conditions, void of reinforcing effects in the  
448 absence of pain. These pain-relieving effects involve the participation of CB2r from  
449 neurons and lymphocytes preventing the neuroinflammatory processes leading to  
450 neuropathic pain. Therefore, CB2r agonists would be of interest for preventing  
451 neuropathic pain development and the potential trials to evaluate this effect should  
452 consider starting CB2r agonist treatment before or shortly after the induction of  
453 neuropathic insults, as in our study, in contrast to the treatment strategies used in  
454 previous clinical trials. The identification of a cannabinoid agonist simultaneously  
455 targeting the behavioral traits and the multiple cell types involved in the

456 pathophysiology of chronic neuropathic pain acquires special relevance in a moment  
457 in which the absence of efficient painkillers void of abuse liability has become a major  
458 burden for public health.

## 459 **Materials and Methods**

### 460 **Animals**

461 C57BL/6J male mice were purchased from Charles River Laboratories (L'Arbresle,  
462 France), and knockout male mice were bred in the Institute of Molecular Psychiatry  
463 (University of Bonn, Bonn, Germany). CB2r constitutive knockouts were bred from  
464 heterozygous parents and their wild-type littermates were used as controls. Neuron  
465 and microglia/macrophage-specific conditional CB2r knockout mice were generated  
466 as previously described (Stempel et al., 2016). Briefly, mice expressing Cre  
467 recombinase under the Synapsin I promoter (Syn) and mice expressing Cre  
468 recombinase inserted into the first coding ATG of the lysozyme 2 gene (LysM) were  
469 crossed with CB2r floxed animals (Cnr2<sup>fl/fl</sup> mice). F1 mice were backcrossed to  
470 Cnr2<sup>fl/fl</sup> mice to generate mice Cnr2<sup>fl/fl</sup> and heterozygous for Cre (Cre-Cnr2<sup>fl/fl</sup>).  
471 SynCre-Cnr2<sup>fl/fl</sup> (Syn Cre+) and LysMCre-Cnr2<sup>fl/fl</sup> (LysM Cre+) mice were selected  
472 and further backcrossed to Cnr2<sup>fl/fl</sup> mice to produce experimental cohorts containing  
473 50% conditional knockout animals (also referred to as neuronal and microglial  
474 knockouts throughout the study) and 50% littermate control animals (referred to as  
475 Cre-Negative mice throughout the study). For bone-marrow transplantation studies,  
476 2 CB2-GFP BAC mice (Schmöle et al., 2015a) or C57BL/6J mice were used as  
477 donors and C57BL/6J mice were used as recipient mice. All mice had a C57BL/6J  
478 genetic background. The behavioral experimental sequence involving operant self-  
479 administration and assessment of nociceptive and anxiety-like behavior was  
480 repeated 3 times in the experiments assessing the effects of JWH133 doses (Figure  
481 1) and 4 and 5 times in the experiments evaluating constitutive and conditional



482 knockout mice, respectively (Figures 2 and 3). The experiments involving bone-  
483 marrow transplantation and lymphocyte depletion were performed once. Sample  
484 size was based on previous studies in our laboratory using comparable behavioral  
485 approaches (Bura et al., 2013, 2018; La Porta et al., Pain 2015).

486 The behavioral experiments were conducted in the animal facility at Universitat  
487 Pompeu Fabra (UPF)-Barcelona Biomedical Research Park (PRBB; Barcelona,  
488 Spain). Mice were housed in a temperature ( $21\pm 1^\circ\text{C}$ ) and humidity-controlled  
489 ( $55\pm 10\%$ ) room and handled during the dark phase of a 12h light/dark reverse cycle  
490 (light off at 8:00 a.m., light on at 8:00 p.m.). Before starting the experimental  
491 procedure, mice were single housed and handled/habituated for 7 days. Food and  
492 water were available *ad libitum* except during the training period for food-maintained  
493 operant behavior, when mice were exposed to restricted diet for 8 days. Animal  
494 handling and experiments were in accordance with protocols approved by the  
495 respective Animal Care and Use Committees of the PRBB, Departament de Territori  
496 i Habitatge of Generalitat de Catalunya and the Institute of Molecular Psychiatry and  
497 were performed in accordance with the European Communities Council Directive  
498 (2010/63/EU). Whenever possible, animals were randomly assigned to their  
499 experimental condition, and experiments were performed under blinded conditions  
500 for surgery and pharmacological treatment (Figure 1), genotype (Figures 2 and 3),  
501 bone-marrow transplant and surgery (Figure 4), and antibody treatments (Figure 5).

## 502 **Drugs**

503 JWH133 (Tocris, Bristol, UK) was dissolved in vehicle solution containing 5%  
504 dimethyl sulfoxide (Scharlab, Sentmenat, Spain) and 5% cremophor EL (Sigma-

505 Aldrich, Steinheim, Germany) in sterilized water and filtered with a 0.22  $\mu\text{m}$  filter  
506 (Millex GP, Millipore, Cork, Ireland). JWH133 was self-administered intravenously  
507 (i.v.) at 0.15 or 0.3 mg/kg/infusion in volume of 23.5  $\mu\text{l}$  per injection. Thiopental  
508 (Braun Medical, Barcelona, Spain) was dissolved in saline and administered through  
509 the implanted i.v. catheter at 10 mg/kg in a volume of 50  $\mu\text{l}$ .

### 510 **Antibody treatment**

511 Anti-ICAM-1 antibody (clone 3E2; 150  $\mu\text{g}$ ; BD Biosciences, Franklin Lakes, NJ, USA)  
512 and control rabbit IgG (150  $\mu\text{g}$ ; Sigma-Aldrich) were dissolved in saline up to a  
513 volume of 300  $\mu\text{l}$  as previously reported (Labuz et al., 2009), and administered i.p.  
514 once a day from the day of the surgery to the last self-administration day.

### 515 **Operant self-administration**

516 Mice were first trained for operant food self-administration to facilitate subsequent  
517 drug self-administration, as previously described (Bura et al., 2018). Briefly, mice  
518 were food-restricted for 3 days to reach 90% of their initial weight. Then, mice were  
519 trained in skinner boxes (model ENV-307A-CT, Med Associates Inc., Georgia, VT,  
520 USA) for 5 days (1 h session per day) to acquire an operant behavior to obtain food  
521 pellets (Figure 1–figure supplement 1B, Figure 2–figure supplement 1B, Figure 3–  
522 figure supplement 1B, Figure 5–figure supplement 1B). A fixed ratio 1 schedule of  
523 reinforcement (FR1) was used, i.e., 1 nose-poke on the active hole resulted in the  
524 delivery of 1 reinforcer together with a light-stimulus for 2 s (associated cue). Nose  
525 poking on the inactive hole had no consequence. Each session started with a priming  
526 delivery of 1 reinforcer and a timeout period of 10 s right after, where no cues and  
527 no reward were provided following active nose-pokes. Food sessions lasted 1 h or

528 until mice nose-poked 100 times on the active hole, whichever happened first. After  
529 the food training, mice underwent a partial sciatic nerve ligation (PSNL) or a sham  
530 surgery, and 4 days later an i.v. catheter was implanted in the right jugular vein to  
531 allow drug delivery. Mice started the drug self-administration sessions 7 days after  
532 the PSNL/sham surgery. In these sessions, the food reinforcer was substituted by  
533 drug/vehicle infusions. Self-administration sessions were conducted during 12  
534 consecutive days, and mice received JWH133 (0.15 or 0.3 mg/kg) or vehicle under  
535 FR1 (Figure 1–figure supplement 1B, Figure 2–figure supplement 1B, Figure 3–  
536 figure supplement 1B, Figure 5–figure supplement 1B). Sessions lasted 1 h or until  
537 60 active nose-pokes. Active and inactive nose-pokes were recorded after each  
538 session and discrimination indices were calculated as the difference between the  
539 nose pokes on the active and the inactive holes, divided by the total nose pokes.  
540 Data from the last 3 drug self-administration sessions was used for statistical  
541 analysis to exclude interference with food-driven operant behavior.

#### 542 **Partial Sciatic Nerve Ligation**

543 Mice underwent a partial ligation of the sciatic nerve at mid-thigh level to induce  
544 neuropathic pain, as previously described (Malmberg and Basbaum, 1998) with  
545 minor modifications. Briefly, mice were anaesthetized with isoflurane (induction, 5%  
546 V/V; surgery, 2% V/V) in oxygen and the sciatic nerve was exposed at the level of  
547 the mid-thigh of the right hind leg. At ~1 cm proximally to the nerve trifurcation, a  
548 tight ligature was created around 33–50% of the cranial side of the sciatic nerve  
549 using a 9–0 non-absorbable virgin silk suture (Alcon Cusí SA, Barcelona, Spain) and  
550 leaving the rest of the nerve untouched. The muscle was then stitched with 6-0 silk

551 (Alcon Cusí), and the incision was closed with wound clips. Sham-operated mice  
552 underwent the same surgical procedure except that the sciatic nerve was not ligated.

### 553 **Catheterization**

554 Mice were implanted with indwelling i.v. silastic catheter, as previously reported  
555 (Soria et al., 2005). Briefly, a 5.5 cm length of silastic tubing (0.3 mm inner diameter,  
556 0.64 mm outer diameter; Silastic®, Dow Corning Europe, Seneffe, Belgium) was  
557 fitted to a 22-gauge steel cannula (Semat Technical Ltd., Herts, UK) that was bent  
558 at a right angle and then embedded in a cement disk (Dentalon Plus, Heraeus  
559 Kulzer, Wehrheim, Germany) with an underlying nylon mesh. The catheter tubing  
560 was inserted 1.3 cm into the right jugular vein and anchored with suture. The  
561 remaining tubing ran subcutaneously to the cannula, which exited at the midscapular  
562 region. All incisions were sutured and coated with antibiotic ointment (Bactroban,  
563 GlaxoSmithKline, Madrid, Spain).

### 564 **Nociception**

565 Sensitivity to heat and mechanical stimuli were used as nociceptive measures of  
566 neuropathic pain. Ipsilateral and contralateral hind paw withdrawal thresholds were  
567 evaluated the day before, 3 and 6 days after the nerve injury, as well as after the last  
568 self-medication session on day 18. Heat sensitivity was assessed by recording the  
569 hind paw withdrawal latency in response to radiant heat applied with the plantar test  
570 apparatus (Ugo Basile, Varese, Italy) as previously reported (Hargreaves et al.,  
571 1988). Punctate mechanical sensitivity was quantified by measuring the withdrawal  
572 response to von Frey filament stimulation through the up-down paradigm, as  
573 previously reported (Chaplan et al., 1994). Filaments equivalent to 0.04, 0.07, 0.16,

574 0.4, 0.6, 1 and 2 g were used, applying first the 0.4 g filament and increasing or  
575 decreasing the strength according to the response. The filaments were bent and held  
576 for 4-5 s against the surface of the hindpaws. Clear paw withdrawal, shaking or  
577 licking was considered a nociceptive-like response.

### 578 **Anxiety-like behavior**

579 Anxiety-like behavior was evaluated with an elevated plus maze made of Plexiglas  
580 and consisting of 4 arms (29 cm long x 5 cm wide), 2 open and 2 closed, set in cross  
581 from a neutral central square (5 x 5 cm) elevated 40 cm above the floor. Light  
582 intensity in the open and closed arms was 45 and 5 lux, respectively. Mice were  
583 placed in the neutral central square facing 1 of the open arms and tested for 5 min.  
584 The percentage of entries and time spent in the open and closed arms was  
585 determined.

### 586 **RNA extraction and reverse transcription**

587 Ipsilateral L3-L4 dorsal root ganglia from mice of the ICAM-1 experiment were  
588 collected on day 20 after the PSNL. Samples were rapidly frozen in dry ice and  
589 stored at  $-80^{\circ}\text{C}$ . Isolation of total RNA was performed using the RNeasy Micro kit  
590 (Qiagen, Stokach, Germany) according to the manufacturer's instructions. Total  
591 RNA concentration was measured using a NanoDrop ND-1000 Spectrophotometer  
592 (NanoDrop Technologies Inc., Montchanin, DE, USA). RNA quality was determined  
593 by chip-based capillary electrophoresis using an Agilent Bioanalyzer 2100 (Agilent,  
594 Palo Alto, CA, USA). Reverse transcription was performed using Omniscript reverse  
595 transcriptase (Qiagen) at  $37^{\circ}\text{C}$  for 60 min.

### 596 **Quantitative real-time PCR analysis**

597 The qRT-PCR reactions were performed using Assay-On-Demand TaqMan probes:  
598 Hprt1 Mm01545399\_m1, CD2 Mm00488928 m1, CD4 Mm00442754\_m1, CD19  
599 Mm00515420\_m1, C1q Mm00432162\_m1 (Applied Biosystems, Carlsbad, CA,  
600 USA) and were run on the CFX96 Touch Real-Time PCR machine (BioRad,  
601 Hercules, CA, USA). Each template was generated from individual animals, and  
602 amplification efficiency for each assay was determined by running a standard dilution  
603 curve. The expression of the Hprt1 transcript was quantified at a stable level between  
604 the experimental groups to control for variations in cDNA amounts. The cycle  
605 threshold values were calculated automatically by the CFX MANAGER v.2.1  
606 software with default parameters. RNA abundance was calculated as  $2^{-(Ct)}$ . Levels  
607 of the target genes were normalized against the housekeeping gene, Hprt1, and  
608 compared using the  $\Delta\Delta Ct$  method (Livak and Schmittgen, 2001).

### 609 **Bone marrow transplantation**

610 C57BL/6J mice received bone marrow from CB2-GFP BAC or C57BL/6J male mice.  
611 G-irradiation of C57BL/6J recipient male mice (9.5 Gy) was performed in a 137Cs-g  
612 IBL 437C H irradiator (Schering CIS Bio international) at 2.56 Gy/min rate in order  
613 to suppress their immune response. Afterwards, approximately  $5 \times 10^5$  bone marrow  
614 cells collected from donors (CB2-GFP BAC or C57BL/6J) and transplanted through  
615 the retro-orbital venous sinus of the recipient mice. Irradiated mice were inspected  
616 daily and were given 150 ml of water with enrofloxacin at 570 mg/l and pH 7.4 (Bayer,  
617 Germany) for 30 days to reduce the probability of infection from opportunistic  
618 pathogens. Peripheral blood samples (150  $\mu$ l) were collected by tail bleeding into a

619 tube with 0.5 M EDTA solution to evaluate immune system recovery through flow  
620 cytometry 4, 8 and 12 weeks after the bone marrow transplantation.

### 621 **Flow cytometry**

622 For the analyses of hematopoietic cells, a hypotonic lysis was performed to remove  
623 erythrocytes. 50µl of blood was lysed using 500µl of ACK (Ammonium-Chloride-  
624 Potassium) Lysing Buffer (Lonza, Walkersville, USA) 10 min at room temperature.  
625 After the erythrocytes lysis, 2 washes with PBS were performed prior the incubation  
626 with the antibodies for 30 min at 4°C. Cells were stained with the following  
627 fluorochrome-coupled antibodies: Allophycocyanin (APC)-conjugated anti-mouse  
628 CD11b (1:300; cn.17-0112 eBioscience, USA) to label myeloid cells, phycoerythrin  
629 (PE)-conjugated anti-mouse B220 (1:100; cn.12-0452, eBioscience, USA) for B  
630 lymphocytes and phycoerythrin/cyanine (PE/Cy7)-conjugated anti-mouse CD3,  
631 1:100; cn.100320, BioLegend, USA) for T lymphocytes. Immunofluorescence of  
632 labeled cells was measured using a BD™ LSR II flow cytometer. Dead cells and  
633 debris were excluded by measurements of forward- versus side-scattered light and  
634 DAPI (4',6-diamino-2-phenylindole) (Sigma) staining. Gates for the respective  
635 antibodies used were established with isotype controls and positive cell subset  
636 controls. Data analysis was carried out using FACSDiva version 6.2 software (BD  
637 biosciences).

### 638 **Immunohistochemistry**

639 Mice were sacrificed 2 weeks after the PSNL/sham surgery and L3-L5 dorsal root  
640 ganglia were collected to quantify GFP+ cells in mice transplanted with bone marrow

641 cells of CB2-GFP or C57BL6/J mice. Ganglia were freshly extracted and fixed in 4%  
642 paraformaldehyde during 25 min at 4°C. After 3x5 min washes with phosphate  
643 buffered saline (PBS) 0.1 M (pH 7.4), were preserved overnight in a 30% sucrose  
644 solution in PBS 0.1 M containing sodium azide 0.02%. 24 h later, ganglia were  
645 embedded in molds filled with optimal cutting temperature compound (Sakura  
646 Finetek Europe B.V., Netherlands) and frozen at -80°C. Samples were sectioned  
647 with a cryostat at 10 µm, thaw-mounted on gelatinized slides and stored at -20°C  
648 until use. Dorsal root ganglia sections were treated 1 h with 0.3 M glycine, 1 h with  
649 oxygenated water 3% (Tyramide Superboost Kit, B40922, Thermo Fisher, USA) and,  
650 after 3x5 min washes with PBS 0.01 M, 1 h with blocking buffer. Samples were  
651 incubated 16 h at room temperature with rabbit anti-GFP (1:2000, A11122, Thermo  
652 Fisher, USA) and chicken anti-neurofilament heavy (NFH) (1:1000, ab4680, Abcam,  
653 UK) antibodies. After 3x10 min washes with PBS 0.01 M, sections were incubated  
654 with anti-rabbit poly-HRP-conjugated secondary antibody for 1 h and washed 4x10  
655 min. Alexa Fluor™ tyramide reagent was applied for 10 min and then the Stop  
656 Reagent solution for 5 min (Tyramide Superboost Kit). Afterwards samples were  
657 incubated 2 h at room temperature with primary antibodies diluted in blocking buffer  
658 (PBS 0.01 M, Triton X-100 0.3%, Normal Goat Serum 10%). The following primary  
659 antibodies were used: rabbit anti-peripherin (1:200, PA3-16723, Thermo Fisher,  
660 USA), rabbit anti-β-III tubulin (1:1000, ab18207, Abcam, UK), rat anti-CD45R/B220  
661 APC (1:500, Clone RA3-6B2, 103229, Biolegend, USA) and rat anti-F4/80 (1:500,  
662 Clone A3-1, MCA497GA, Biorad, USA). After 3x5 min washes, all sections were  
663 treated with goat secondary antibodies from Abcam (UK) for 1 h at room  
664 temperature: anti-chicken Alexa Fluor® 647 (1:1000, ab150171), anti-rabbit Alexa



665 Fluor® 555 (1:1000, ab150078) and anti-rat Alexa Fluor® 555 (1:1000, ab150158).  
666 Samples were then washed with PBS 0.01 M and mounted with 24x24 mm  
667 coverslips (Brand, Germany) using Fluoromount-G with DAPI (SouthernBiotech,  
668 USA).

### 669 **Microscope image acquisition and processing**

670 Confocal images were taken with a Leica TCS SP5 confocal microscope (Leica  
671 Microsystems, Mannheim, Germany) on a DM6000 stand using 20x 0.7 NA Air and  
672 63x 1.4 NA Oil Immersion Plan Apochromatic lenses. Leica Application Suite  
673 Advanced Fluorescence software (Leica Microsystems, Mannheim, Germany) was  
674 used to acquire the images and DAPI, Alexa 488 and Alexa 555 channels were taken  
675 sequentially. Images of DAPI were taken with 405 nm excitation and emission  
676 detection between 415 and 480 nm; images of Alexa 488 were taken with 488 nm  
677 excitation and emission detection between 495 and 540 nm; and images of Alexa  
678 555 were taken with 543 nm excitation and emission detection between 555 and 710  
679 nm. Room temperature was kept at  $22\pm 1^\circ\text{C}$  during all imaging sessions. All images  
680 were equally processed and quantified with Fiji software (National Institutes of  
681 Health, USA). To determine the percentage of dorsal root ganglia area occupied by  
682 GFP (+) neurons auto-threshold ("Otsu") was set between 0-50 in all images and  
683 then converted to mask. Afterwards, operations included Close, Fill holes and  
684 Watershed neurons for separation and particles between 100-100000 pixel units and  
685 circularity 0.2-1.0 were counted. To analyze the number of GFP+ cells per dorsal  
686 root ganglia area, background was subtracted from all images (rolling=5), set to an

687 auto-threshold ("Default") between 0-70 and converted to mask. Particles  
688 considered GFP+ were 7-100 microns<sup>2</sup> and 0.2-1.0 circularity.

## 689 **Statistical analysis**

690 Self-administration and nociceptive behavioral data were analyzed using a linear  
691 mixed model with 3 (surgery, day and dose) or 2 factors (day and genotype or  
692 antibody treatment) and their interactions. For the covariance structure of the  
693 repeated measures, a diagonal matrix was chosen. Bonferroni post hoc analysis was  
694 performed when pertinent. Areas Under the Curve (AUCs) of time-courses for  
695 operant responding were analyzed using 2-way analysis of variance (ANOVA).  
696 Active and inactive responses were analyzed taking into account surgery and dose  
697 effects in the dose-response experiments, and active/inactive and genotype or  
698 antibody treatment in the knockout and antibody experiments. Anxiety-like behavior  
699 was analyzed using 2-way ANOVA (surgery and dose for dose-response  
700 experiments), 1-way ANOVA (genotype of conditional knockouts) or t-tests  
701 (constitutive knockout and antibody treatment), followed by Bonferroni adjustments  
702 when required. Immunohistochemistry of bone marrow-transplanted mice was  
703 analyzed using Kruskal Wallis non-parametric tests followed by Mann–Whitney U  
704 tests (non-gaussian distribution revealed by Kolmogorov-Smirnov normality test),  
705 and qPCR results after antibody treatments were compared with t-tests. IBM SPSS  
706 19 (SPSS Inc., Chicago, IL, USA) and STATISTICA 6.0 (StatSoft, USA) software  
707 were used to analyze the data, and differences were considered statistically  
708 significant when p value was below 0.05. All experimental data and statistical  
709 analyses of this study are included in the manuscript and its supplementary files.

710 Raw data and results of statistical analyses are provided in the Source Data File and  
711 its containing data sheets.

712

## 713 **Acknowledgements**

714 Financial support of European Commission [NeuroPain, FP7-602891-2], Instituto de  
715 Salud Carlos III, Redes temáticas de investigación cooperativa en salud – Red de  
716 trastornos adictivos [#RD12/0028/0023/FEDER], "Ministerio de Economía y  
717 Competitividad-MINECO" [#SAF2014-59648-P], "Generalitat de Catalunya-  
718 Agència de Gestió d'Ajuts Universitaris i de Recerca-AGAUR" [#2014-SGR-1547  
719 and #2018 FI\_B 00207] and "AGAUR" [Institució Catalana de Recerca i Estudis  
720 Avançats Academia Award 2015] to R.M. and Polish Ministry of Science and  
721 Education [#3070/7.PR/2014/2]. Authors thank Itzel M. Lara, Hugo Ramos, Roberto  
722 Cabrera and Cristina Fernández for their help and technical expertise.

## 723 **Competing Interests**

724 The authors declare no conflict of interest.

## 725 **References**

- 726 Alvarez-Dolado M, Pardal R, Garcia-Verdugo JM, Fike JR, Lee HO, Pfeffer K, Lois  
727 C, Morrison SJ, Alvarez-Buylla A. 2003. Fusion of bone-marrow-derived cells  
728 with Purkinje neurons, cardiomyocytes and hepatocytes. *Nature* **425**:968–73.  
729 doi:10.1038/nature02069
- 730 Attal N, Bouhassira D. 2015. Pharmacotherapy of neuropathic pain. *Pain*  
731 **156**:S104–S114. doi:10.1097/01.j.pain.0000460358.01998.15
- 732 Backonja M-M, Stacey B. 2004. Neuropathic pain symptoms relative to overall pain  
733 rating. *J Pain* **5**:491–497. doi:10.1016/j.jpain.2004.09.001
- 734 Bie B, Wu J, Foss JF, Naguib M. 2018. An overview of the cannabinoid type 2  
735 receptor system and its therapeutic potential. *Curr Opin Anaesthesiol.*  
736 doi:10.1097/ACO.0000000000000616
- 737 Blank T, Prinz M. 2016. CatacLysMic specificity when targeting myeloid cells? *Eur*  
738 *J Immunol* **46**:1340–1342. doi:10.1002/eji.201646437
- 739 Bonnet U, Scherbaum N. 2017. How addictive are gabapentin and pregabalin? A  
740 systematic review. *Eur Neuropsychopharmacol* **27**:1185–1215.  
741 doi:10.1016/j.euroneuro.2017.08.430
- 742 Budnik V, Ruiz-Cañada C, Wendler F. 2016. Extracellular vesicles round off  
743 communication in the nervous system. *Nat Rev Neurosci* **17**:160–72.  
744 doi:10.1038/nrn.2015.29
- 745 Bura AS, Guegan T, Zamanillo D, Vela JM, Maldonado R. 2013. Operant self-  
746 administration of a sigma ligand improves nociceptive and emotional  
747 manifestations of neuropathic pain. *Eur J Pain* **17**:832–843.  
748 doi:10.1002/j.1532-2149.2012.00251.x
- 749 Bura SA, Cabañero D, Maldonado R. 2018. Operant self-administration of  
750 pregabalin in a mouse model of neuropathic pain. *Eur J Pain* **22**:763–773.  
751 doi:10.1002/ejp.1161
- 752 Celik MÖ, Labuz D, Henning K, Busch-Dienstfertig M, Gaveriaux-Ruff C, Kieffer  
753 BL, Zimmer A, Machelska H. 2016. Leukocyte opioid receptors mediate  
754 analgesia via Ca(2+)-regulated release of opioid peptides. *Brain Behav Immun*  
755 **57**:227–242. doi:10.1016/j.bbi.2016.04.018

- 756 Chan LN, Chen Z, Braas D, Lee J-W, Xiao G, Geng H, Cosgun KN, Hurtz C,  
757 Shojaee S, Cazzaniga V, Schjerven H, Ernst T, Hochhaus A, Kornblau SM,  
758 Konopleva M, Pufall MA, Cazzaniga G, Liu GJ, Milne TA, Koeffler HP, Ross  
759 TS, Sánchez-García I, Borkhardt A, Yamamoto KR, Dickins RA, Graeber TG,  
760 Müschen M. 2017. Metabolic gatekeeper function of B-lymphoid transcription  
761 factors. *Nature* **542**:479–483. doi:10.1038/nature21076
- 762 Chaplan SR, Bach FW, Pogrel JW, Chung JM, Yaksh TL. 1994. Quantitative  
763 assessment of tactile allodynia in the rat paw. *J Neurosci Methods* **53**:55–63.
- 764 Deane JA, Abeynaike LD, Norman MU, Wee JL, Kitching AR, Kubes P, Hickey MJ.  
765 2012. Endogenous Regulatory T Cells Adhere in Inflamed Dermal Vessels via  
766 ICAM-1: Association with Regulation of Effector Leukocyte Adhesion. *J*  
767 *Immunol* **188**:2179–2188. doi:10.4049/jimmunol.1102752
- 768 Fernández-Ruiz J, Romero J, Velasco G, Tolón RM, Ramos JA, Guzmán M. 2007.  
769 Cannabinoid CB2 receptor: a new target for controlling neural cell survival?  
770 *Trends Pharmacol Sci* **28**:39–45. doi:10.1016/j.tips.2006.11.001
- 771 Finnerup NB, Attal N, Haroutounian S, McNicol E, Baron R, Dworkin RH, Gilron I,  
772 Haanpää M, Hansson P, Jensen TS, Kamerman PR, Lund K, Moore A, Raja  
773 SN, Rice ASC, Rowbotham M, Sena E, Siddall P, Smith BH, Wallace M. 2015.  
774 Pharmacotherapy for neuropathic pain in adults: a systematic review and  
775 meta-analysis. *Lancet Neurol* **14**:162–173. doi:10.1016/S1474-  
776 4422(14)70251-0
- 777 Giordano-Santini R, Linton C, Hilliard MA. 2016. Cell-cell fusion in the nervous  
778 system: Alternative mechanisms of development, injury, and repair. *Semin*  
779 *Cell Dev Biol* **60**:146–154. doi:10.1016/j.semcdb.2016.06.019
- 780 Gutierrez T, Crystal JD, Zvonok AM, Makriyannis A, Hohmann AG. 2011. Self-  
781 medication of a cannabinoid CB2 agonist in an animal model of neuropathic  
782 pain. *Pain* **152**:1976–87. doi:10.1016/j.pain.2011.03.038
- 783 Hargreaves K, Dubner R, Brown F, Flores C, Joris J. 1988. A new and sensitive  
784 method for measuring thermal nociception in cutaneous hyperalgesia. *Pain*  
785 **32**:77–88.
- 786 Hipolito L, Wilson-Poe A, Campos-Jurado Y, Zhong E, Gonzalez-Romero J, Virag

- 787 L, Whittington R, Comer SD, Carlton SM, Walker BM, Bruchas MR, Moron JA.  
788 2015. Inflammatory Pain Promotes Increased Opioid Self-Administration: Role  
789 of Dysregulated Ventral Tegmental Area Opioid Receptors. *J Neurosci*  
790 **35**:12217–12231. doi:10.1523/JNEUROSCI.1053-15.2015
- 791 Huang L, Ou R, Rabelo de Souza G, Cunha TM, Lemos H, Mohamed E, Li L,  
792 Pacholczyk G, Randall J, Munn DH, Mellor AL. 2016. Virus Infections Incite  
793 Pain Hypersensitivity by Inducing Indoleamine 2,3 Dioxygenase. *PLOS Pathog*  
794 **12**:e1005615. doi:10.1371/journal.ppat.1005615
- 795 Huang T, Lin S-H, Malewicz NM, Zhang Yan, Zhang Ying, Goulding M, LaMotte  
796 RH, Ma Q. 2018. Identifying the pathways required for coping behaviours  
797 associated with sustained pain. *Nature*. doi:10.1038/s41586-018-0793-8
- 798 Ibrahim MM, Deng H, Zvonok A, Cockayne DA, Kwan J, Mata HP, Vanderah TW,  
799 Lai J, Porreca F, Makriyannis A, Malan TP. 2003. Activation of CB2  
800 cannabinoid receptors by AM1241 inhibits experimental neuropathic pain: Pain  
801 inhibition by receptors not present in the CNS. *Proc Natl Acad Sci* **100**:10529–  
802 10533. doi:10.1073/pnas.1834309100
- 803 Jafari MR, Golmohammadi S, Ghiasvand F, Zarrindast MR, Djahanguiri B. 2007.  
804 Influence of nicotinic receptor modulators on CB2 cannabinoid receptor  
805 agonist (JWH133)-induced antinociception in mice. *Behav Pharmacol* **18**:691–  
806 7. doi:10.1097/FBP.0b013e3282f00c10
- 807 Jiang B-C, Cao D-L, Zhang X, Zhang Z-J, He L-N, Li C-H, Zhang W-W, Wu X-B,  
808 Berta T, Ji R-R, Gao Y-J. 2016. CXCL13 drives spinal astrocyte activation and  
809 neuropathic pain via CXCR5. *J Clin Invest* **126**:745–761.  
810 doi:10.1172/JCI81950
- 811 La Porta C, Bura SA, Llorente-Onaindia J, Pastor A, Navarrete F, García-Gutiérrez  
812 MS, De la Torre R, Manzanares J, Monfort J, Maldonado R. 2015. Role of the  
813 endocannabinoid system in the emotional manifestations of osteoarthritis pain.  
814 *Pain* **156**:2001–2012. doi:10.1097/j.pain.0000000000000260
- 815 Labuz D, Schmidt Y, Schreiter A, Rittner HL, Mousa SA, Machelska H. 2009.  
816 Immune cell-derived opioids protect against neuropathic pain in mice. *J Clin*  
817 *Invest* **119**:278–86. doi:10.1172/JCI36246

- 818 Li W-W, Guo T-Z, Shi X, Czirr E, Stan T, Sahbaie P, Wyss-Coray T, Kingery WS,  
819 Clark DJ. 2014. Autoimmunity contributes to nociceptive sensitization in a  
820 mouse model of complex regional pain syndrome. *Pain* **155**:2377–2389.  
821 doi:10.1016/j.pain.2014.09.007
- 822 Livak KJ, Schmittgen TD. 2001. Analysis of relative gene expression data using  
823 real-time quantitative PCR and the 2(-Delta Delta C(T)) Method. *Methods*  
824 **25**:402–8. doi:10.1006/meth.2001.1262
- 825 López A, Aparicio N, Pazos MR, Grande MT, Barreda-Manso MA, Benito-Cuesta I,  
826 Vázquez C, Amores M, Ruiz-Pérez G, García-García E, Beatka M, Tolón RM,  
827 Dittel BN, Hillard CJ, Romero J. 2018. Cannabinoid CB2 receptors in the  
828 mouse brain: relevance for Alzheimer’s disease. *J Neuroinflammation* **15**:158.  
829 doi:10.1186/s12974-018-1174-9
- 830 Maldonado R, Baños JE, Cabañero D. 2016. The endocannabinoid system and  
831 neuropathic pain. *Pain* **157**:S23–S32. doi:10.1097/j.pain.0000000000000428
- 832 Malmberg AB, Basbaum AI. 1998. Partial sciatic nerve injury in the mouse as a  
833 model of neuropathic pain: behavioral and neuroanatomical correlates. *Pain*  
834 **76**:215–22.
- 835 Manzanares J, Cabañero D, Puente N, García-Gutiérrez MS, Grandes P,  
836 Maldonado R. 2018. Role of the endocannabinoid system in drug addiction.  
837 *Biochem Pharmacol* **157**:108–121. doi:10.1016/j.bcp.2018.09.013
- 838 Mogil JS. 2009. Animal models of pain: progress and challenges. *Nat Rev*  
839 *Neurosci* **10**:283–94. doi:10.1038/nrn2606
- 840 Mogil JS, Davis KD, Derbyshire SW. 2010. The necessity of animal models in pain  
841 research. *Pain* **151**:12–17. doi:10.1016/j.pain.2010.07.015
- 842 Munro S, Thomas KL, Abu-Shaar M. 1993. Molecular characterization of a  
843 peripheral receptor for cannabinoids. *Nature* **365**:61–65.  
844 doi:10.1038/365061a0
- 845 Nozaki C, Nent E, Bilkei-Gorzo A, Zimmer A. 2018. Involvement of leptin signaling  
846 in the development of cannabinoid CB2 receptor-dependent mirror image pain.  
847 *Sci Rep* **8**:10827. doi:10.1038/s41598-018-28507-6
- 848 O’Connor EC, Chapman K, Butler P, Mead AN. 2011. The predictive validity of the



- 849 rat self-administration model for abuse liability. *Neurosci Biobehav Rev*  
850 **35**:912–938. doi:10.1016/j.neubiorev.2010.10.012
- 851 Percie du Sert N, Rice ASC. 2014. Improving the translation of analgesic drugs to  
852 the clinic: animal models of neuropathic pain. *Br J Pharmacol* **171**:2951–63.  
853 doi:10.1111/bph.12645
- 854 Quraishi SA, Paladini CA. 2016. A Central Move for CB2 Receptors. *Neuron*  
855 **90**:670–1. doi:10.1016/j.neuron.2016.05.012
- 856 Racz I, Nadal X, Alferink J, Banos JE, Rehnelt J, Martin M, Pintado B, Gutierrez-  
857 Adan A, Sanguino E, Manzanares J, Zimmer A, Maldonado R. 2008. Crucial  
858 Role of CB2 Cannabinoid Receptor in the Regulation of Central Immune  
859 Responses during Neuropathic Pain. *J Neurosci* **28**:12125–12135.  
860 doi:10.1523/JNEUROSCI.3400-08.2008
- 861 Rice ASC, Finnerup NB, Kemp HI, Currie GL, Baron R. 2018. Sensory profiling in  
862 animal models of neuropathic pain. *Pain* **159**:819–824.  
863 doi:10.1097/j.pain.0000000000001138
- 864 Ridder K, Keller S, Dams M, Rupp A-K, Schlaudraff J, Del Turco D, Starmann J,  
865 Macas J, Karpova D, Devraj K, Depboylu C, Landfried B, Arnold B, Plate KH,  
866 Höglinger G, Sültmann H, Altevogt P, Momma S. 2014. Extracellular Vesicle-  
867 Mediated Transfer of Genetic Information between the Hematopoietic System  
868 and the Brain in Response to Inflammation. *PLoS Biol* **12**:e1001874.  
869 doi:10.1371/journal.pbio.1001874
- 870 Schmöle A-C, Lundt R, Gennequin B, Schrage H, Beins E, Krämer A, Zimmer T,  
871 Limmer A, Zimmer A, Otte D-M. 2015a. Expression Analysis of CB2-GFP BAC  
872 Transgenic Mice. *PLoS One* **10**:e0138986. doi:10.1371/journal.pone.0138986
- 873 Schmöle A-C, Lundt R, Ternes S, Albayram Ö, Ulas T, Schultze JL, Bano D,  
874 Nicotera P, Alferink J, Zimmer A. 2015b. Cannabinoid receptor 2 deficiency  
875 results in reduced neuroinflammation in an Alzheimer’s disease mouse model.  
876 *Neurobiol Aging* **36**:710–9. doi:10.1016/j.neurobiolaging.2014.09.019
- 877 Shang Y, Tang Y. 2017. The central cannabinoid receptor type-2 (CB2) and  
878 chronic pain. *Int J Neurosci*. doi:10.1080/00207454.2016.1257992
- 879 Soethoudt M, Grether U, Fingerle J, Grim TW, Fezza F, de Petrocellis L, Ullmer C,

- 880 Rothenhäusler B, Perret C, van Gils N, Finlay D, MacDonald C, Chicca A,  
881 Gens MD, Stuart J, de Vries H, Mastrangelo N, Xia L, Alachouzos G,  
882 Baggelaar MP, Martella A, Mock ED, Deng H, Heitman LH, Connor M, Di  
883 Marzo V, Gertsch J, Lichtman AH, Maccarrone M, Pacher P, Glass M, van der  
884 Stelt M. 2017. Cannabinoid CB2 receptor ligand profiling reveals biased  
885 signalling and off-target activity. *Nat Commun* **8**:13958.  
886 doi:10.1038/ncomms13958
- 887 Soria G, Mendizábal V, Touriño C, Robledo P, Ledent C, Parmentier M,  
888 Maldonado R, Valverde O. 2005. Lack of CB1 cannabinoid receptor impairs  
889 cocaine self-administration. *Neuropsychopharmacology* **30**:1670–80.  
890 doi:10.1038/sj.npp.1300707
- 891 Stempel AV, Stumpf A, Zhang H-Y, Özdoğan T, Pannasch U, Theis A-K, Otte D-M,  
892 Wojtalla A, Rácz I, Ponomarenko A, Xi Z-X, Zimmer A, Schmitz D. 2016.  
893 Cannabinoid Type 2 Receptors Mediate a Cell Type-Specific Plasticity in the  
894 Hippocampus. *Neuron* **90**:795–809. doi:10.1016/j.neuron.2016.03.034
- 895 Terashima T, Kojima H, Fujimiya M, Matsumura K, Oi J, Hara M, Kashiwagi A,  
896 Kimura H, Yasuda H, Chan L. 2005. The fusion of bone-marrow-derived  
897 proinsulin-expressing cells with nerve cells underlies diabetic neuropathy. *Proc*  
898 *Natl Acad Sci U S A* **102**:12525–30. doi:10.1073/pnas.0505717102
- 899 Vandewauw I, De Clercq K, Mulier M, Held K, Pinto S, Van Ranst N, Segal A, Voet  
900 T, Vennekens R, Zimmermann K, Vriens J, Voets T. 2018. A TRP channel trio  
901 mediates acute noxious heat sensing. *Nature* **555**:662–666.  
902 doi:10.1038/nature26137
- 903 Zhang H-Y, Gao M, Liu Q-R, Bi G-H, Li X, Yang H-J, Gardner EL, Wu J, Xi Z-X.  
904 2014. Cannabinoid CB2 receptors modulate midbrain dopamine neuronal  
905 activity and dopamine-related behavior in mice. *Proc Natl Acad Sci U S A*  
906 **111**:E5007-15. doi:10.1073/pnas.1413210111
- 907 Zhang Yong, Zhang X, Xia Y, Jia X, Li H, Zhang Yanyan, Shao Z, Xin N, Guo M,  
908 Chen J, Zheng S, Wang Y, Fu L, Xiao C, Geng D, Liu Y, Cui G, Dong R,  
909 Huang X, Yu T. 2016. CD19+ Tim-1+ B cells are decreased and negatively  
910 correlated with disease severity in Myasthenia Gravis patients. *Immunol Res*

911           **64**:1216–1224. doi:10.1007/s12026-016-8872-0  
912   Zhao D-M, Thornton AM, DiPaolo RJ, Shevach EM. 2006. Activated CD4+CD25+  
913   T cells selectively kill B lymphocytes. *Blood* **107**:3925–3932.  
914   doi:10.1182/blood-2005-11-4502  
915  
916

## Supplementary figures

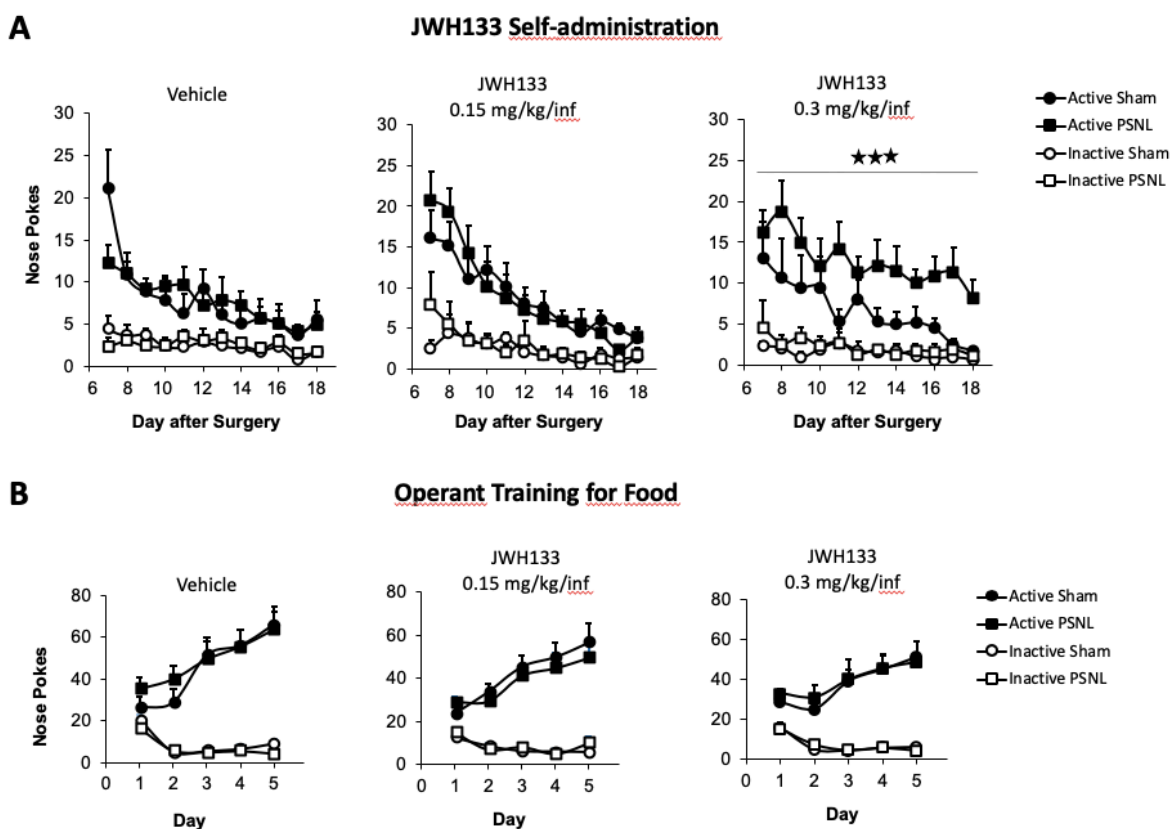

917

918 **Figure 1-figure supplement 1. JWH133 self-administration after nerve injury or**  
919 **sham surgery in C57BL6/J mice and food-maintained operant training before**  
920 **the drug self-administration. A)** The first day of i.v. self-administration, sham-  
921 operated mice exposed to the vehicle showed higher active nose pokes than nerve-  
922 injured mice exposed to the same treatment. For the rest of the JWH133 self-  
923 administration period, mice exposed to the vehicle or to the low dose of JWH133  
924 (0.15 mg/kg/inf) showed similar operant behaviour, regardless of the type of surgery.  
925 Nerve-injured mice exposed to the high dose of JWH133 (0.3 mg/kg/inf.) showed  
926 higher active nose poking than sham mice exposed to this dose. Inactive responding  
927 was similar regardless of type of the surgery and treatment. **B)** All groups of mice  
928 developed operant behaviour directed to obtain food pellets before the partial sciatic  
929 nerve ligation (PSNL) or the sham surgery. N=7-10 mice per group. Mean and error  
930 bars representing SEM are shown. Stars represent  $p < 0.001$  vs. respective sham  
931 group. Raw data and statistics available in Source Data File.

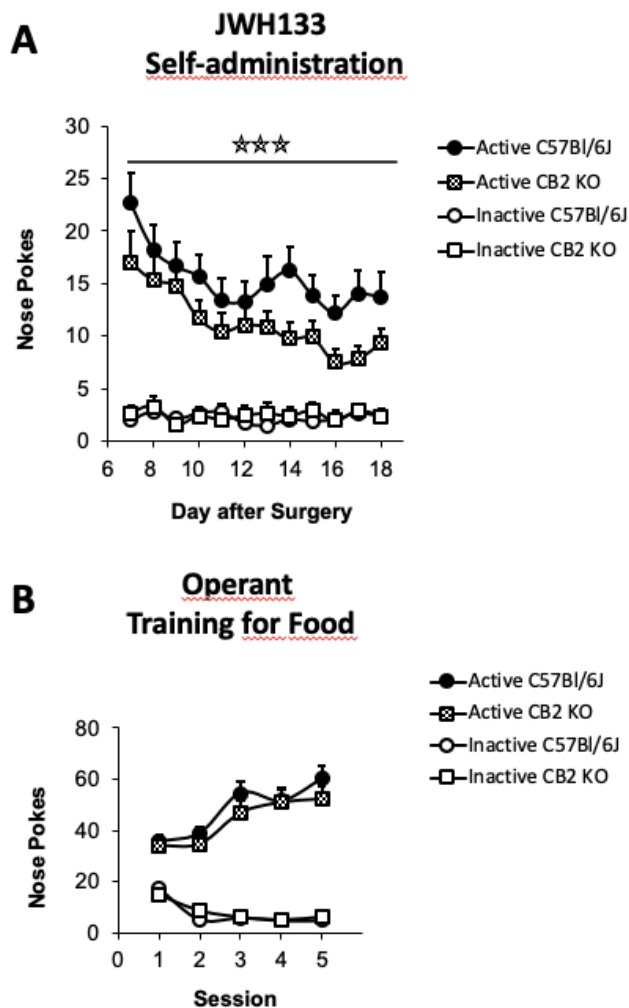

932

933 **Figure 2-figure supplement 1. JWH133 self-administration in C57BL6/J and**  
934 **CB2r constitutive knockout (CB2 KO) mice and food-maintained operant**  
935 **training before nerve injury and drug self-administration. A) Nerve-injured CB2**  
936 **KO mice showed a disruption of the active operant behaviour directed to obtain high**  
937 **doses of the CB2r agonist JWH133 (0.3 mg/kg/inf.). B) C57BL6/J and CB2 KO mice**  
938 **developed similar operant behaviour for food before the partial sciatic nerve ligation.**  
939 **N=16-19 mice per group. Stars represent p<0.001 vs. C57BL6/J. Raw data and**  
940 **statistics available in Source Data File**

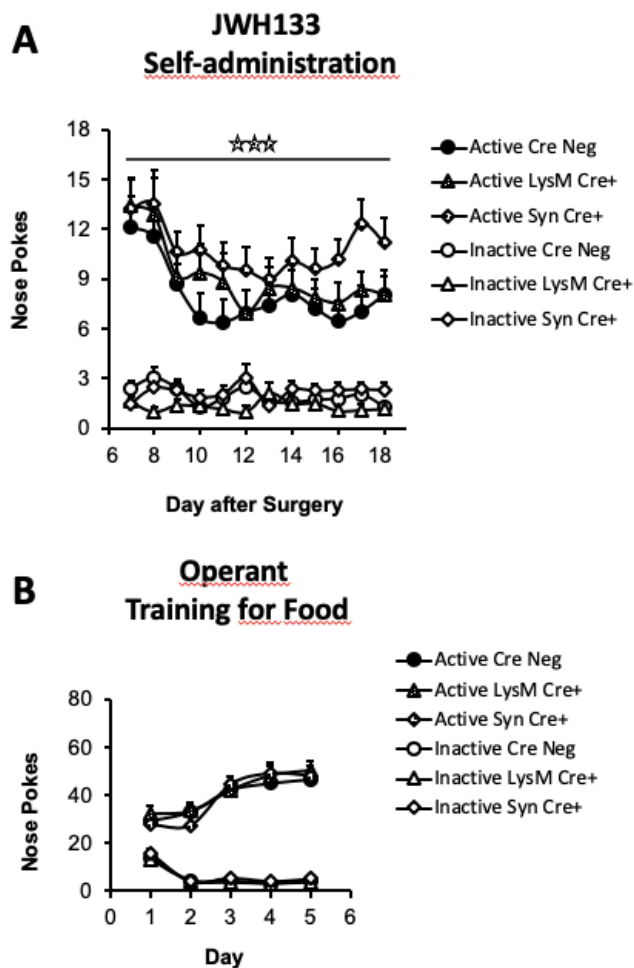

941

942 **Figure 3-figure supplement 1. JWH133 self-administration in mice lacking**  
943 **CB2r in neurons or monocytes and their wild-type littermates and food-**  
944 **maintained operant training before nerve injury and drug self-administration.**

945 **A)** Mice lacking CB2r in neurons (Syn Cre+) mice showed increased active operant  
946 behaviour directed to obtain high doses of the CB2r agonist JWH133 (0.3 mg/kg/inf.).  
947 Operant responding for the CB2r agonist was similar between mice lacking CB2r in  
948 monocytes (LysM Cre+) mice and their wild-type littermates (Cre Neg). **B)** Syn Cre+,  
949 LysM Cre+ and Cre Neg mice developed similar operant behaviour for food before  
950 the partial sciatic nerve ligation. N=18-36 mice per group. Stars represent  $p < 0.001$   
951 vs. Cre Neg. Raw data and statistics available in Source Data File.

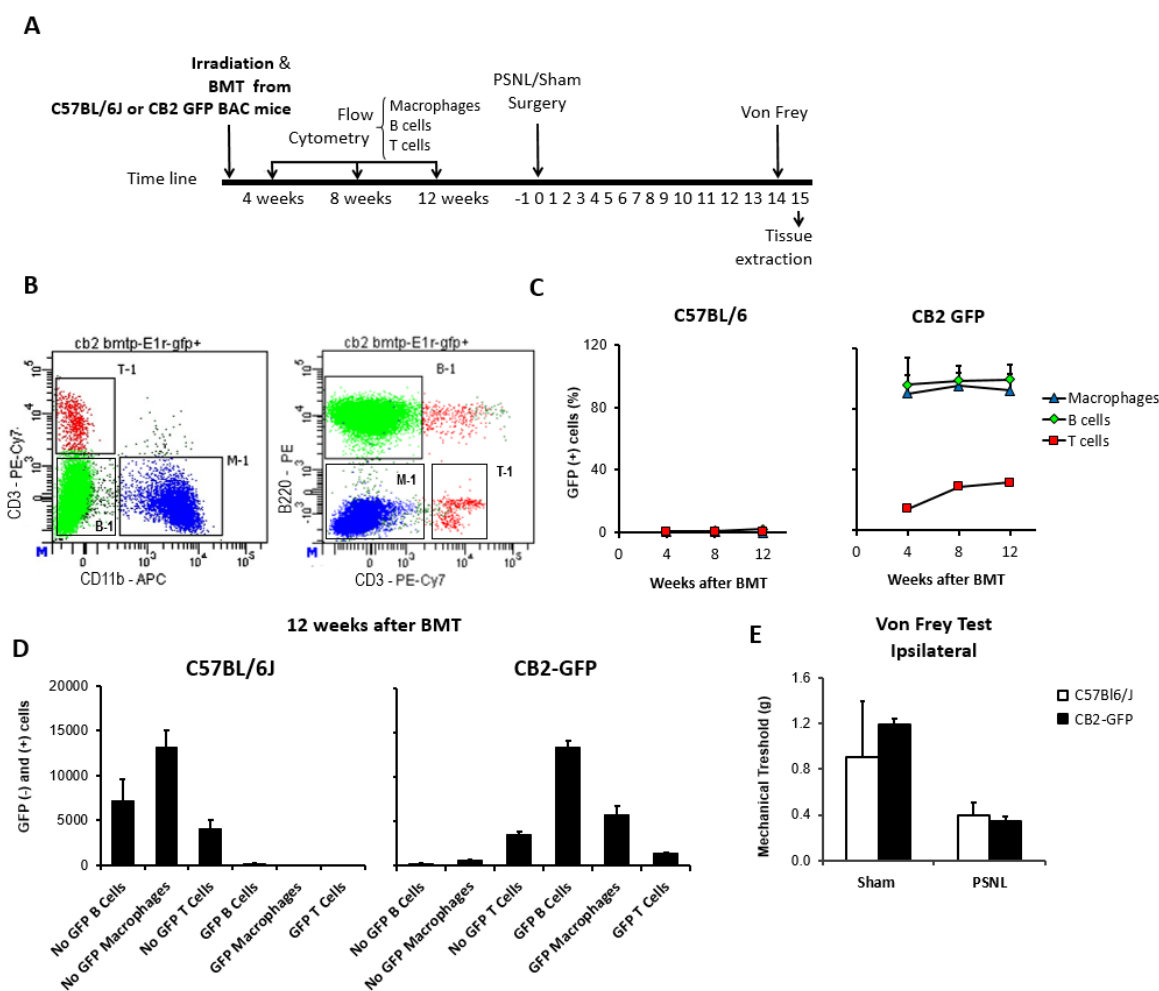

952

953 **Figure 4-figure supplement 1. Bone marrow transplantation from CB2 GFP**  
 954 **BAC to C57BL6/J mice yields mice with peripheral blood cells expressing GFP.**

955 **A)** C57BL6/J mice were irradiated and immediately transplanted with bone marrow  
 956 cells from CB2 GFP BAC or C57BL6/J mice, yielding CB2-GFP or C57BL6/J mice.  
 957 Repeated flow cytometry assays were conducted 4, 8 and 12 weeks after the bone  
 958 marrow transplantation to assess reconstitution of the immune system. Afterwards,  
 959 a nerve injury or sham surgery was conducted in mice with successful reconstitution  
 960 (day 0). 14 days later, mechanical nociception was assessed with the von Frey test  
 961 and dorsal root ganglia samples were collected the following day. **B)** Representative  
 962 dot plot of flow cytometry showing the labeling of peripheral blood cells from a CB2-  
 963 GFP bone marrow-transplanted mouse. Cells were pre-gated as single live cells  
 964 using DAPI staining. T cells (T-1), B cells (B-1) and macrophages (M-1) were gated.  
 965 PE/Cy7 labeled CD3+ T lymphocytes, APC CD11b+ myeloid cells and PE-B220

966 labeled B lymphocytes. **C)** Percentage of GFP+ immune cells in C57Bl/6J and CB2-  
967 GFP mice from 4 to 12 weeks after transplantation. **D)** 12 weeks after transplantation  
968 CB2-GFP mice showed 98% of macrophages GFP+, 86% of B cells GFP+ and 30%  
969 of T cells GFP+, whereas C57BL/6J mice did not show significant GFP signal in the  
970 different cell populations. n= 4-6 mice per group. **E)** Mechanical thresholds  
971 measured before sample collection showed ipsilateral paw sensitization in C57BL/6J  
972 and CB2-GFP mice with the nerve injury. n= 2-3 mice per group. Means and error  
973 bars representing SEM are shown. Raw data and statistics available in Source Data  
974 File.

975



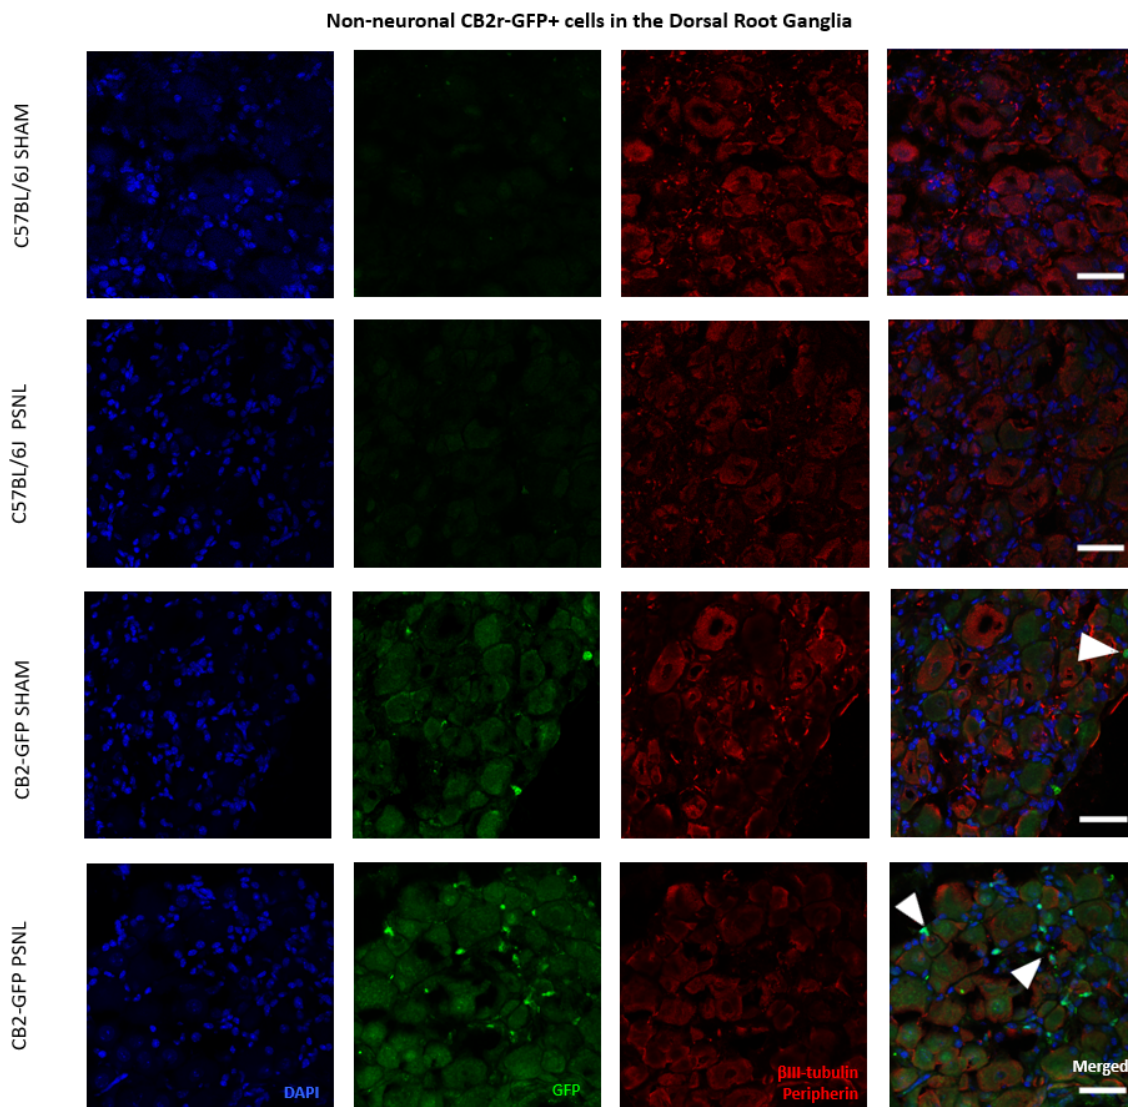

**Figure 4-figure supplement 2. Non-neuronal CB2r-GFP+ cells in the Dorsal Root Ganglia.** Split and merged channels of L3-L5 dorsal root ganglia images from sham or nerve-injured mice transplanted with bone marrow cells from CB2 GFP BAC mice (CB2-GFP) or C57BL6/J mice (C57BL6/J). Dorsal root ganglia sections were stained with the nuclear marker DAPI, anti-GFP, and neuronal markers anti- $\beta$ -III tubulin and anti-peripherin. Sham or nerve-injured C57BL6/J mice did not show significant GFP immunoreactivity. CB2-GFP mice showed infiltration of bone-marrow derived cells enhanced with the nerve injury. Scale bar, 45  $\mu$ m. White arrows point to GFP+ cells. A certain degree of image processing has been applied equally across merged images to allow optimal visualization.

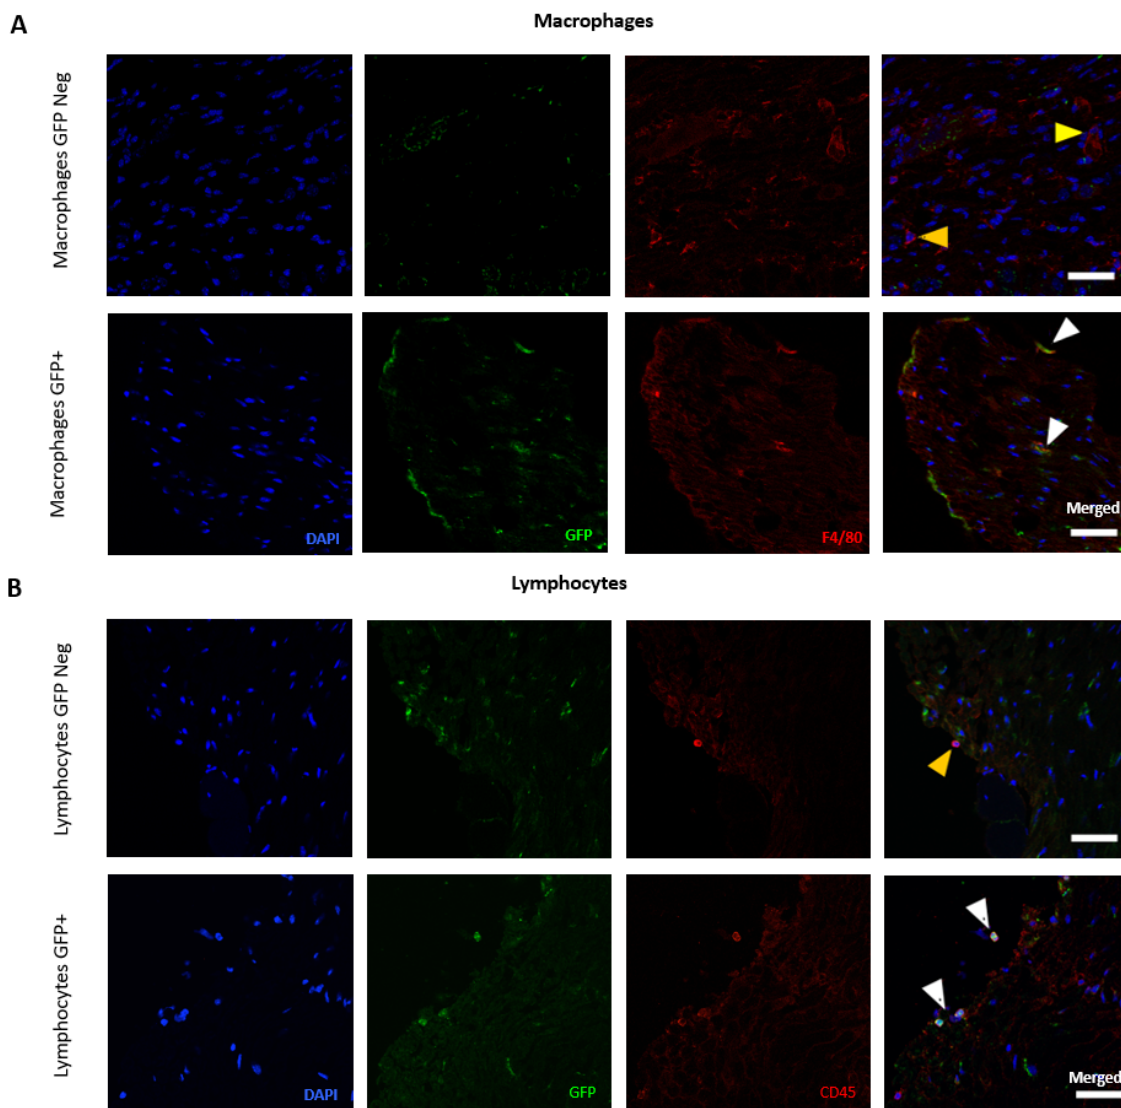

987

988 **Figure 4-figure supplement 3. Presence of CB2r-GFP in immune cells in the**  
989 **Dorsal Root Ganglia.** Split and merged channels showing **A)** Co-localization of  
990 CB2-GFP and the macrophage marker anti-F4/80. **B)** Co-staining of anti-GFP and  
991 lymphocyte marker anti-CD45. Scale bar, 45  $\mu$ m. Yellow arrows point to GFP  
992 negative cells and white arrows to GFP+ cells. Certain degree of image  
993 processing has been applied equally across merged images for optimal  
994 visualization.

995

996

997

998

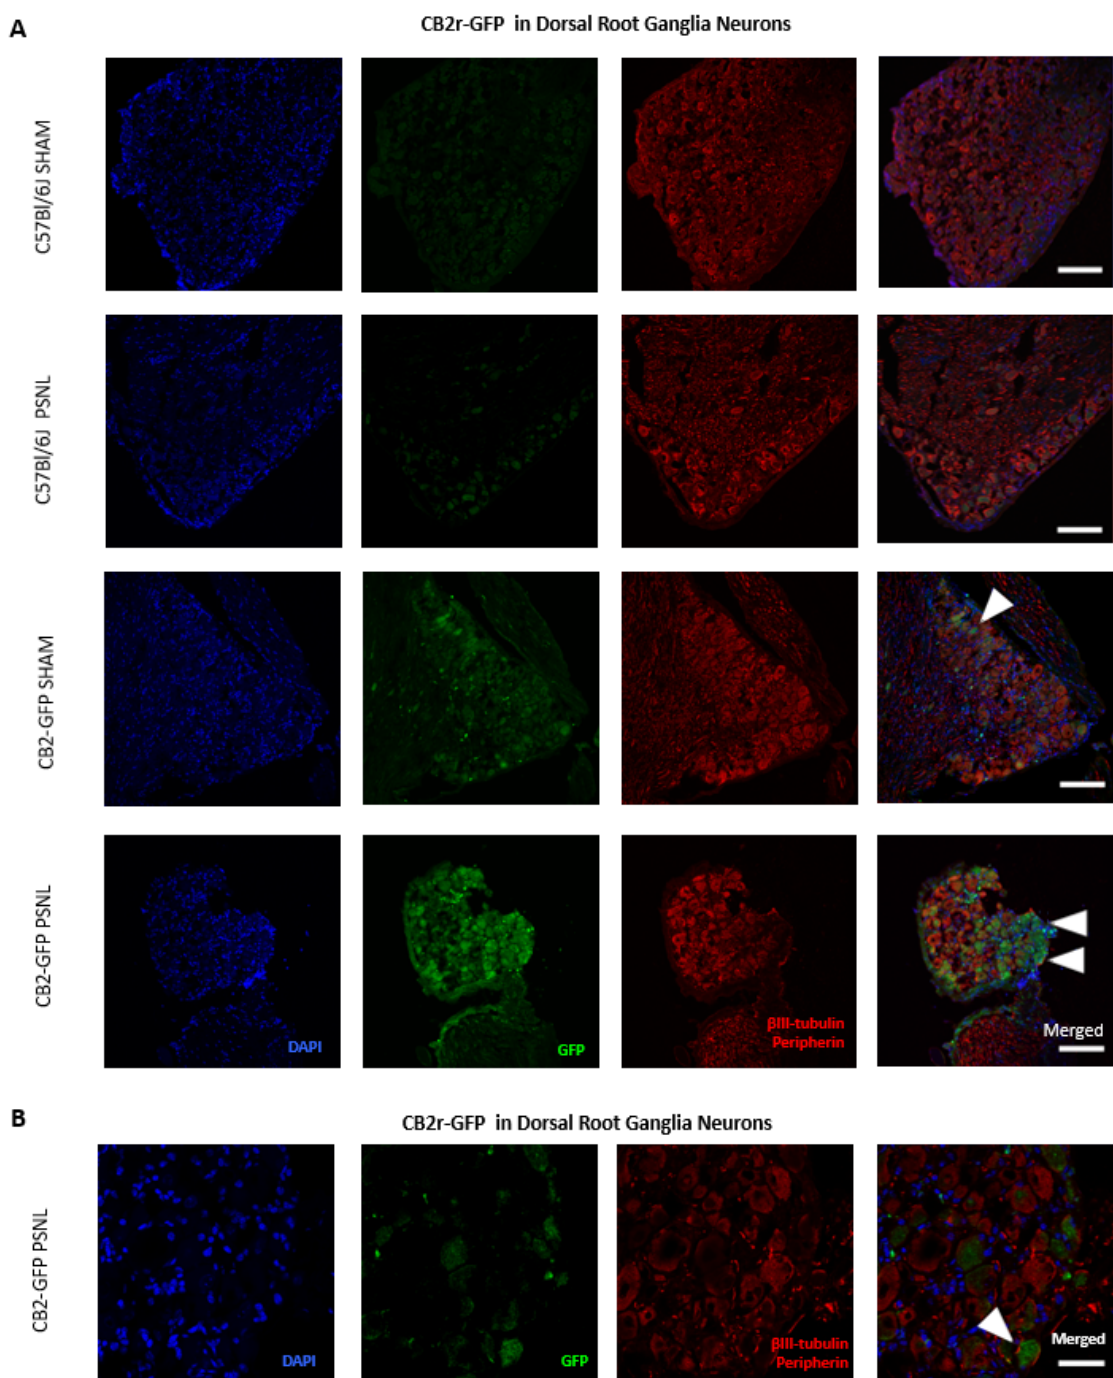

999

1000

1001 **Figure 4-figure supplement 4. CB2r-GFP in Dorsal Root Ganglia Neurons.**

1002 Images of L3-L5 dorsal root ganglia from sham or nerve-injured mice transplanted

1003 with bone marrow cells from CB2 GFP BAC mice (CB2-GFP) or C57BL6/J mice

1004 (C57BL6/J). **A), B)** Split and merged channels of dorsal root ganglia sections stained  
1005 with the nuclear marker DAPI, anti-GFP, and neuronal markers anti- $\beta$ -III tubulin and  
1006 anti-peripherin. **A)** Sham or nerve-injured C57BL6/J mice did not show significant  
1007 GFP immunoreactivity. CB2-GFP mice showed a percentage of GFP+ neurons that  
1008 was enhanced with the nerve injury. Scale bar, 140  $\mu$ m. **B)** Amplified section of  
1009 dorsal root ganglia from CB2-GFP PSNL mice showing neuronal GFP. Scale bar, 45  
1010  $\mu$ m. Certain degree of image processing has been applied equally across the  
1011 merged images for optimal visualization.

1012

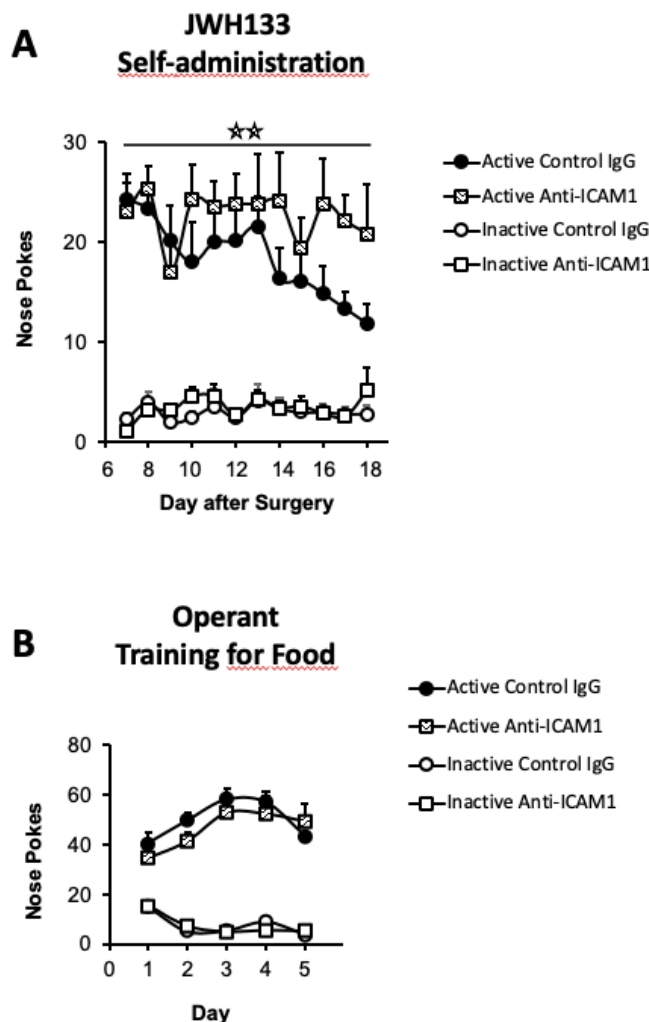

1013

1014 **Figure 5-figure supplement 1. JWH133 self-administration of nerve-injured**  
1015 **mice treated with anti-ICAM1 or control IgG and food-maintained operant**  
1016 **training before nerve injury and drug self-administration. A) Anti-ICAM1-treated**  
1017 **mice showed increased active operant responding directed to obtain high doses of**  
1018 **the CB2r agonist JWH133 (0.3 mg/kg/inf.) after the nerve injury. B) C57BL6/J mice**  
1019 **of both groups anti-ICAM1 and control IgG developed similar operant behaviour for**  
1020 **food before the partial sciatic nerve ligation. N=6-7 mice per group. Stars represent**  
1021 **p<0.01 vs. control IgG group. Raw data and statistics available in Source Data File.**



**Figure 1**

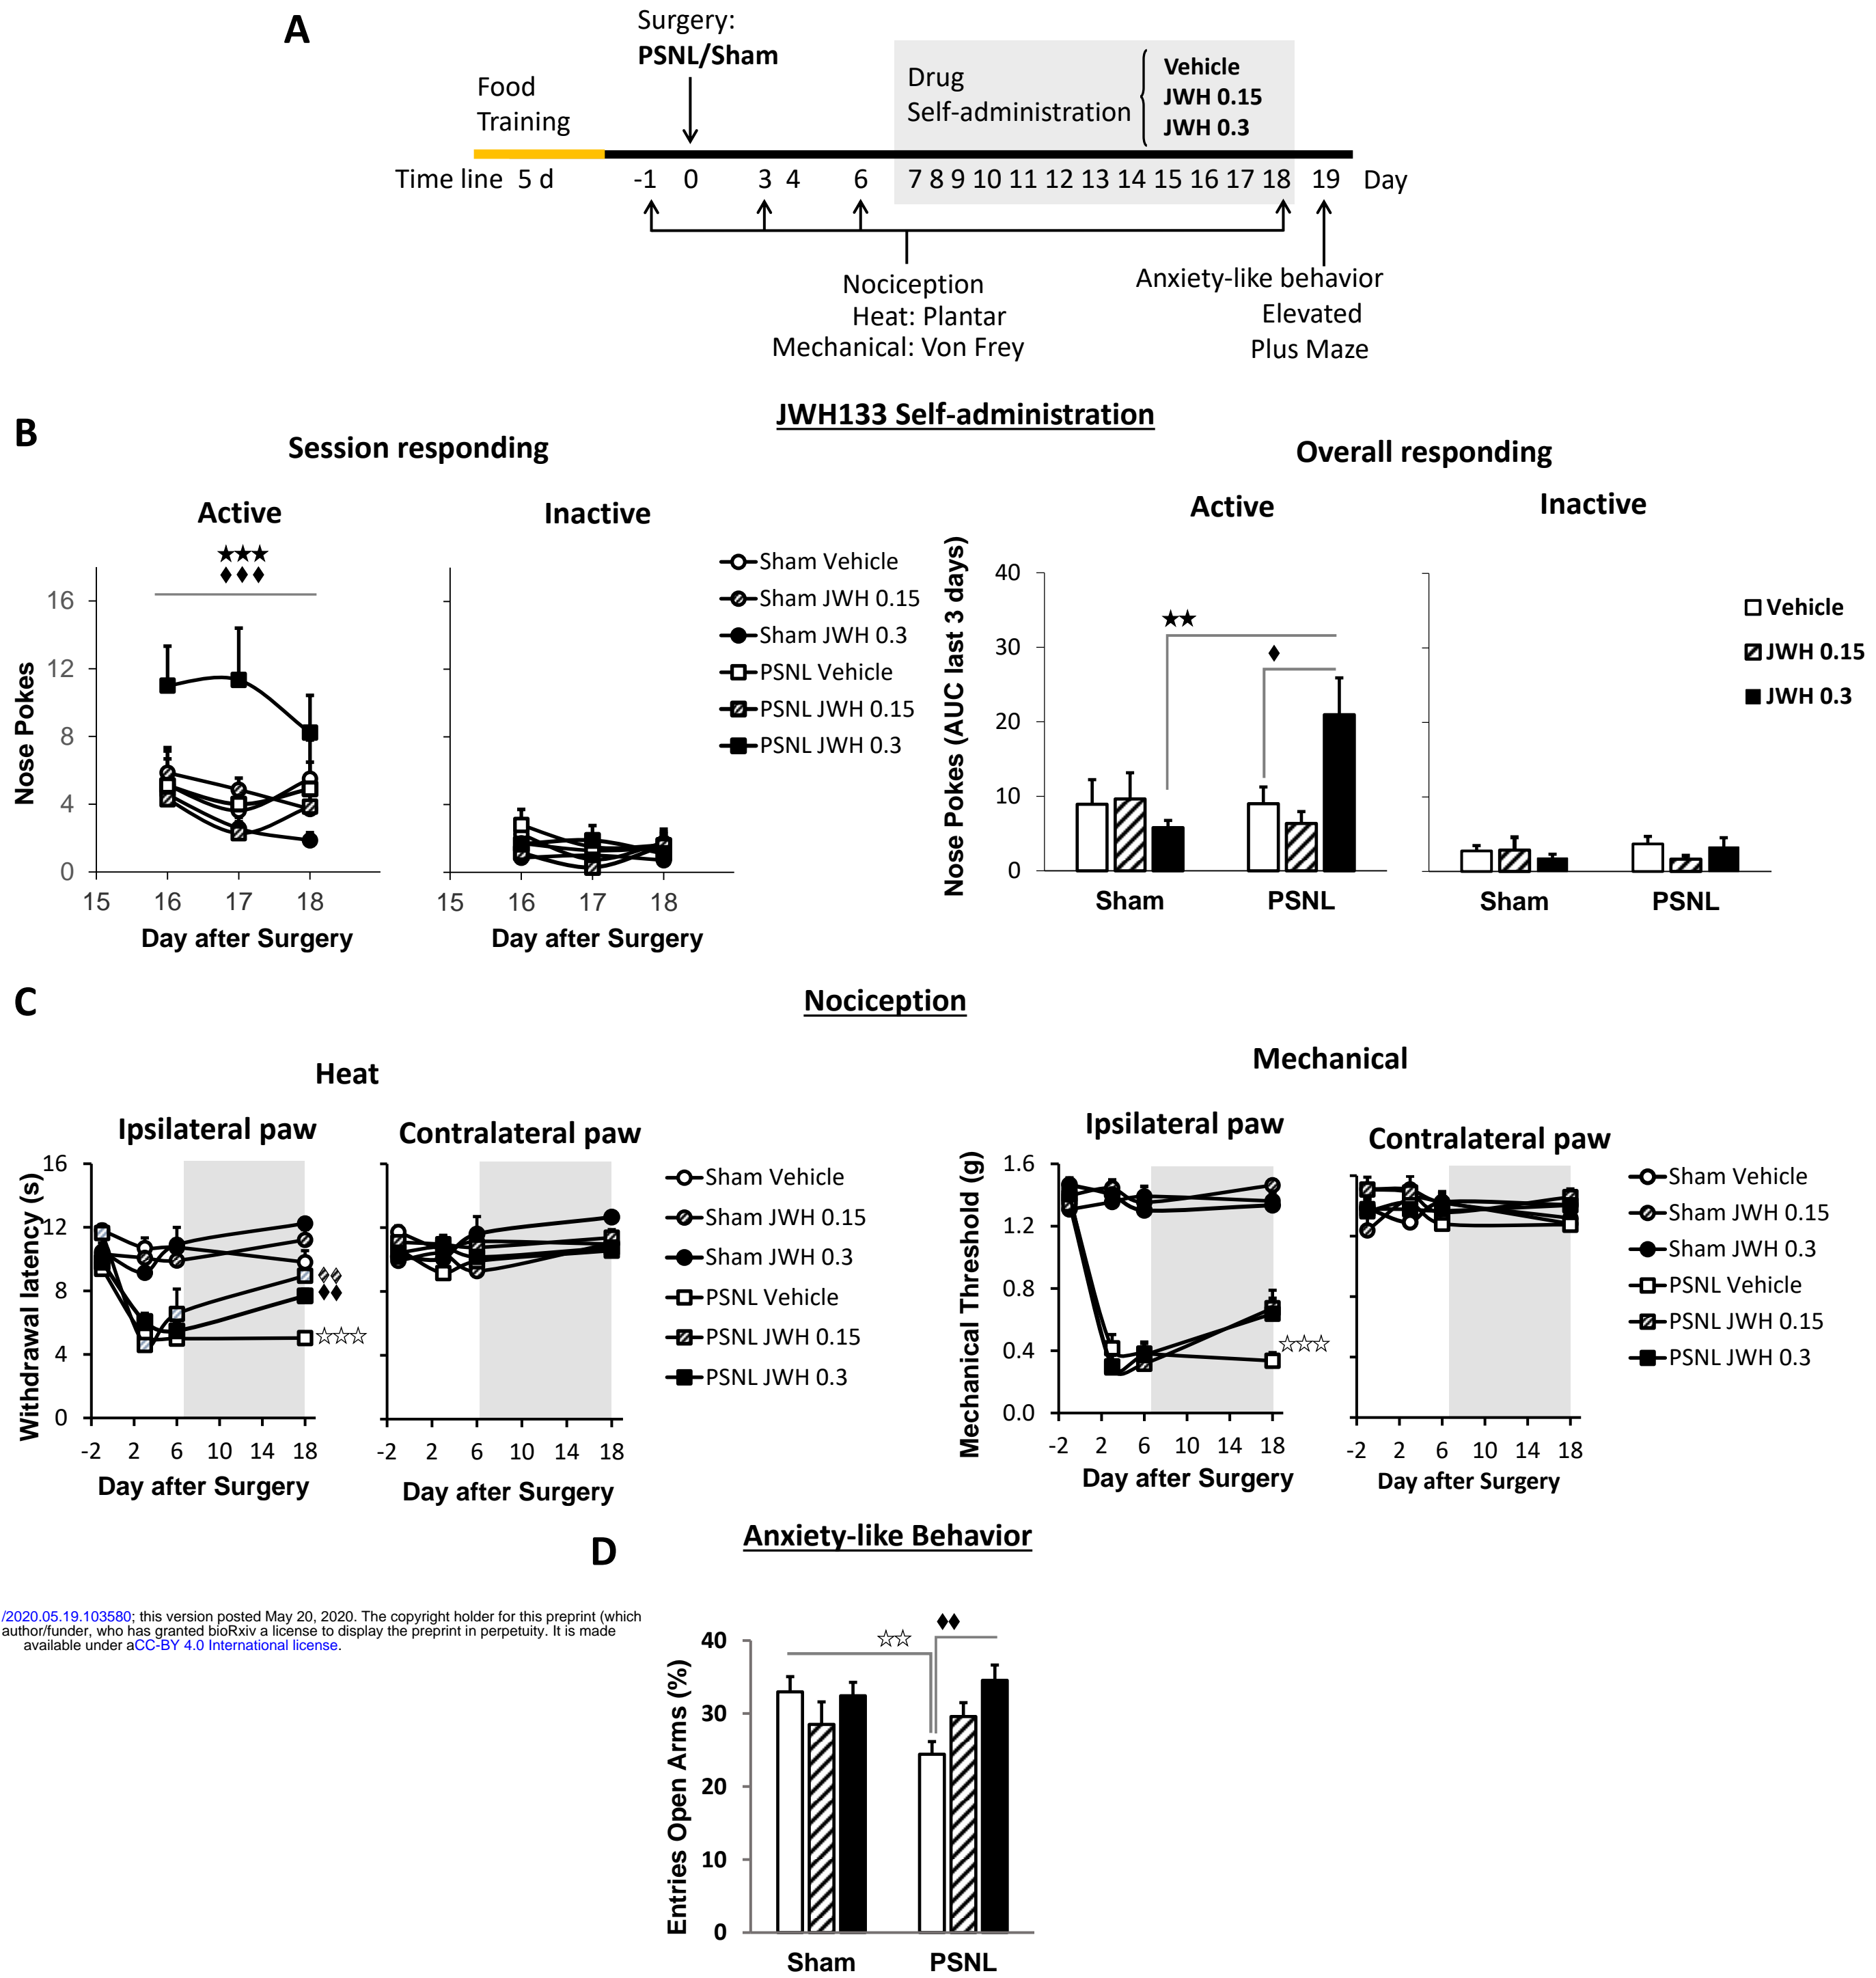

Figure 2

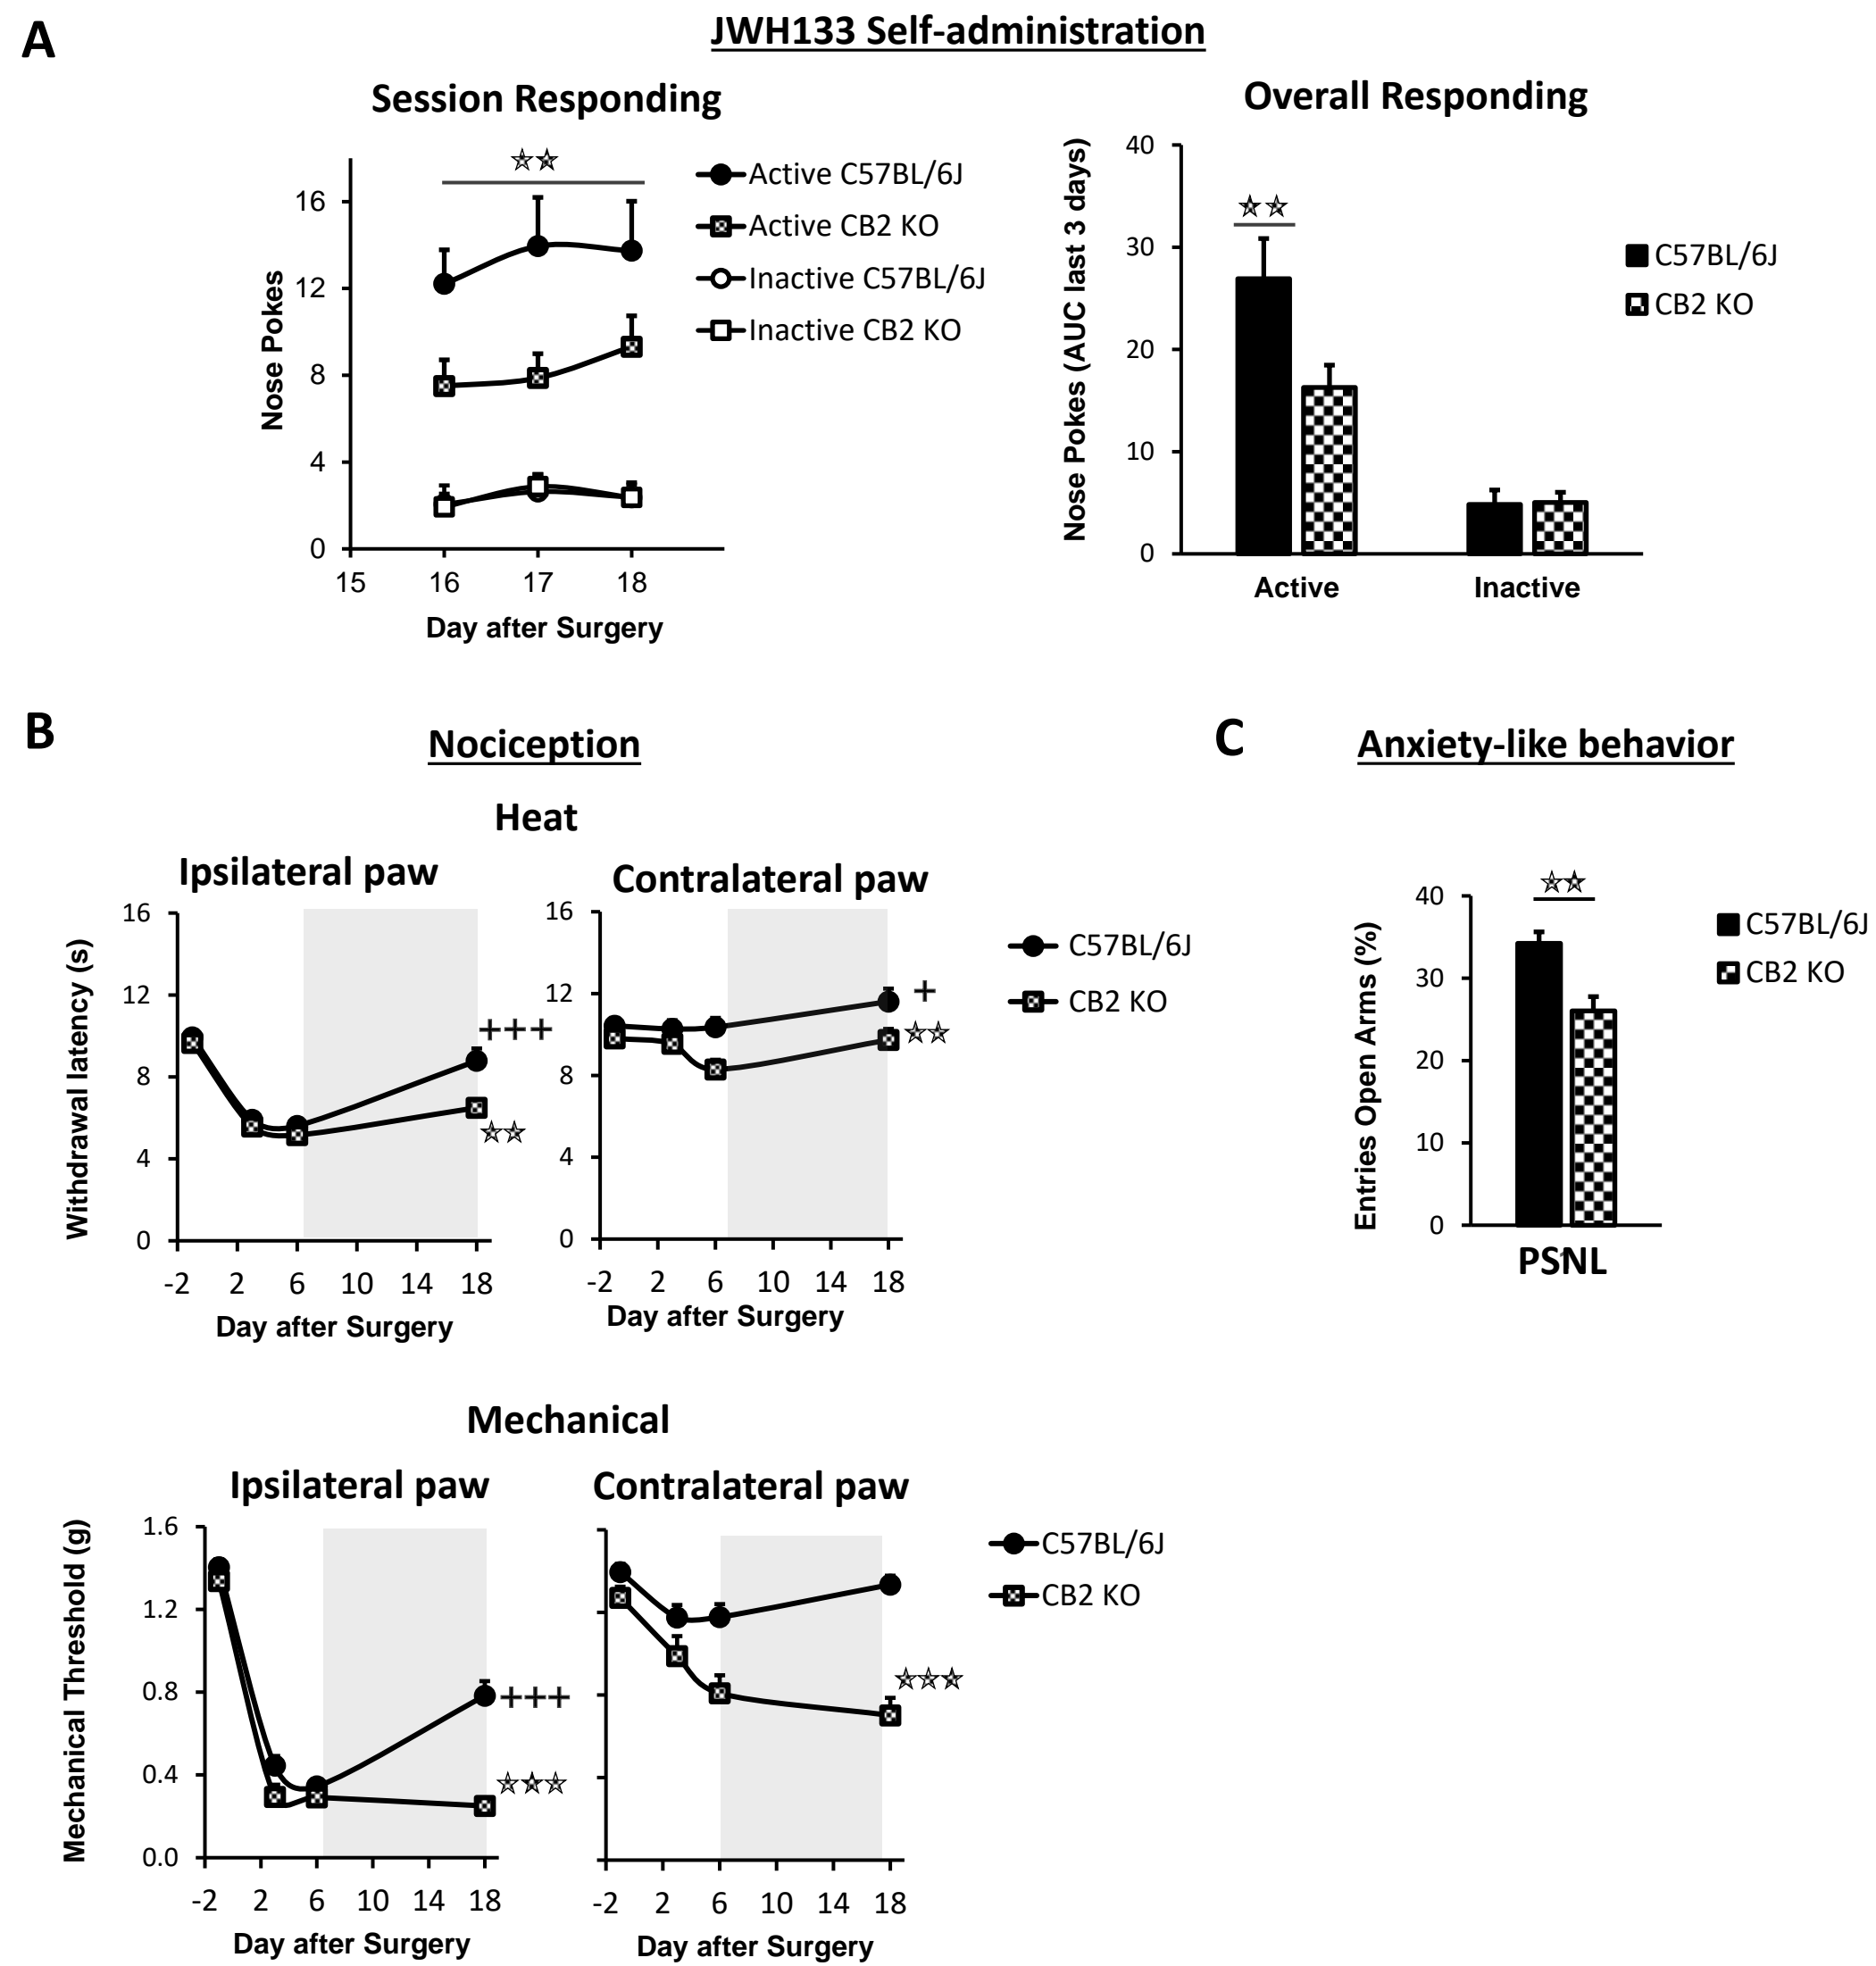

Figure 3

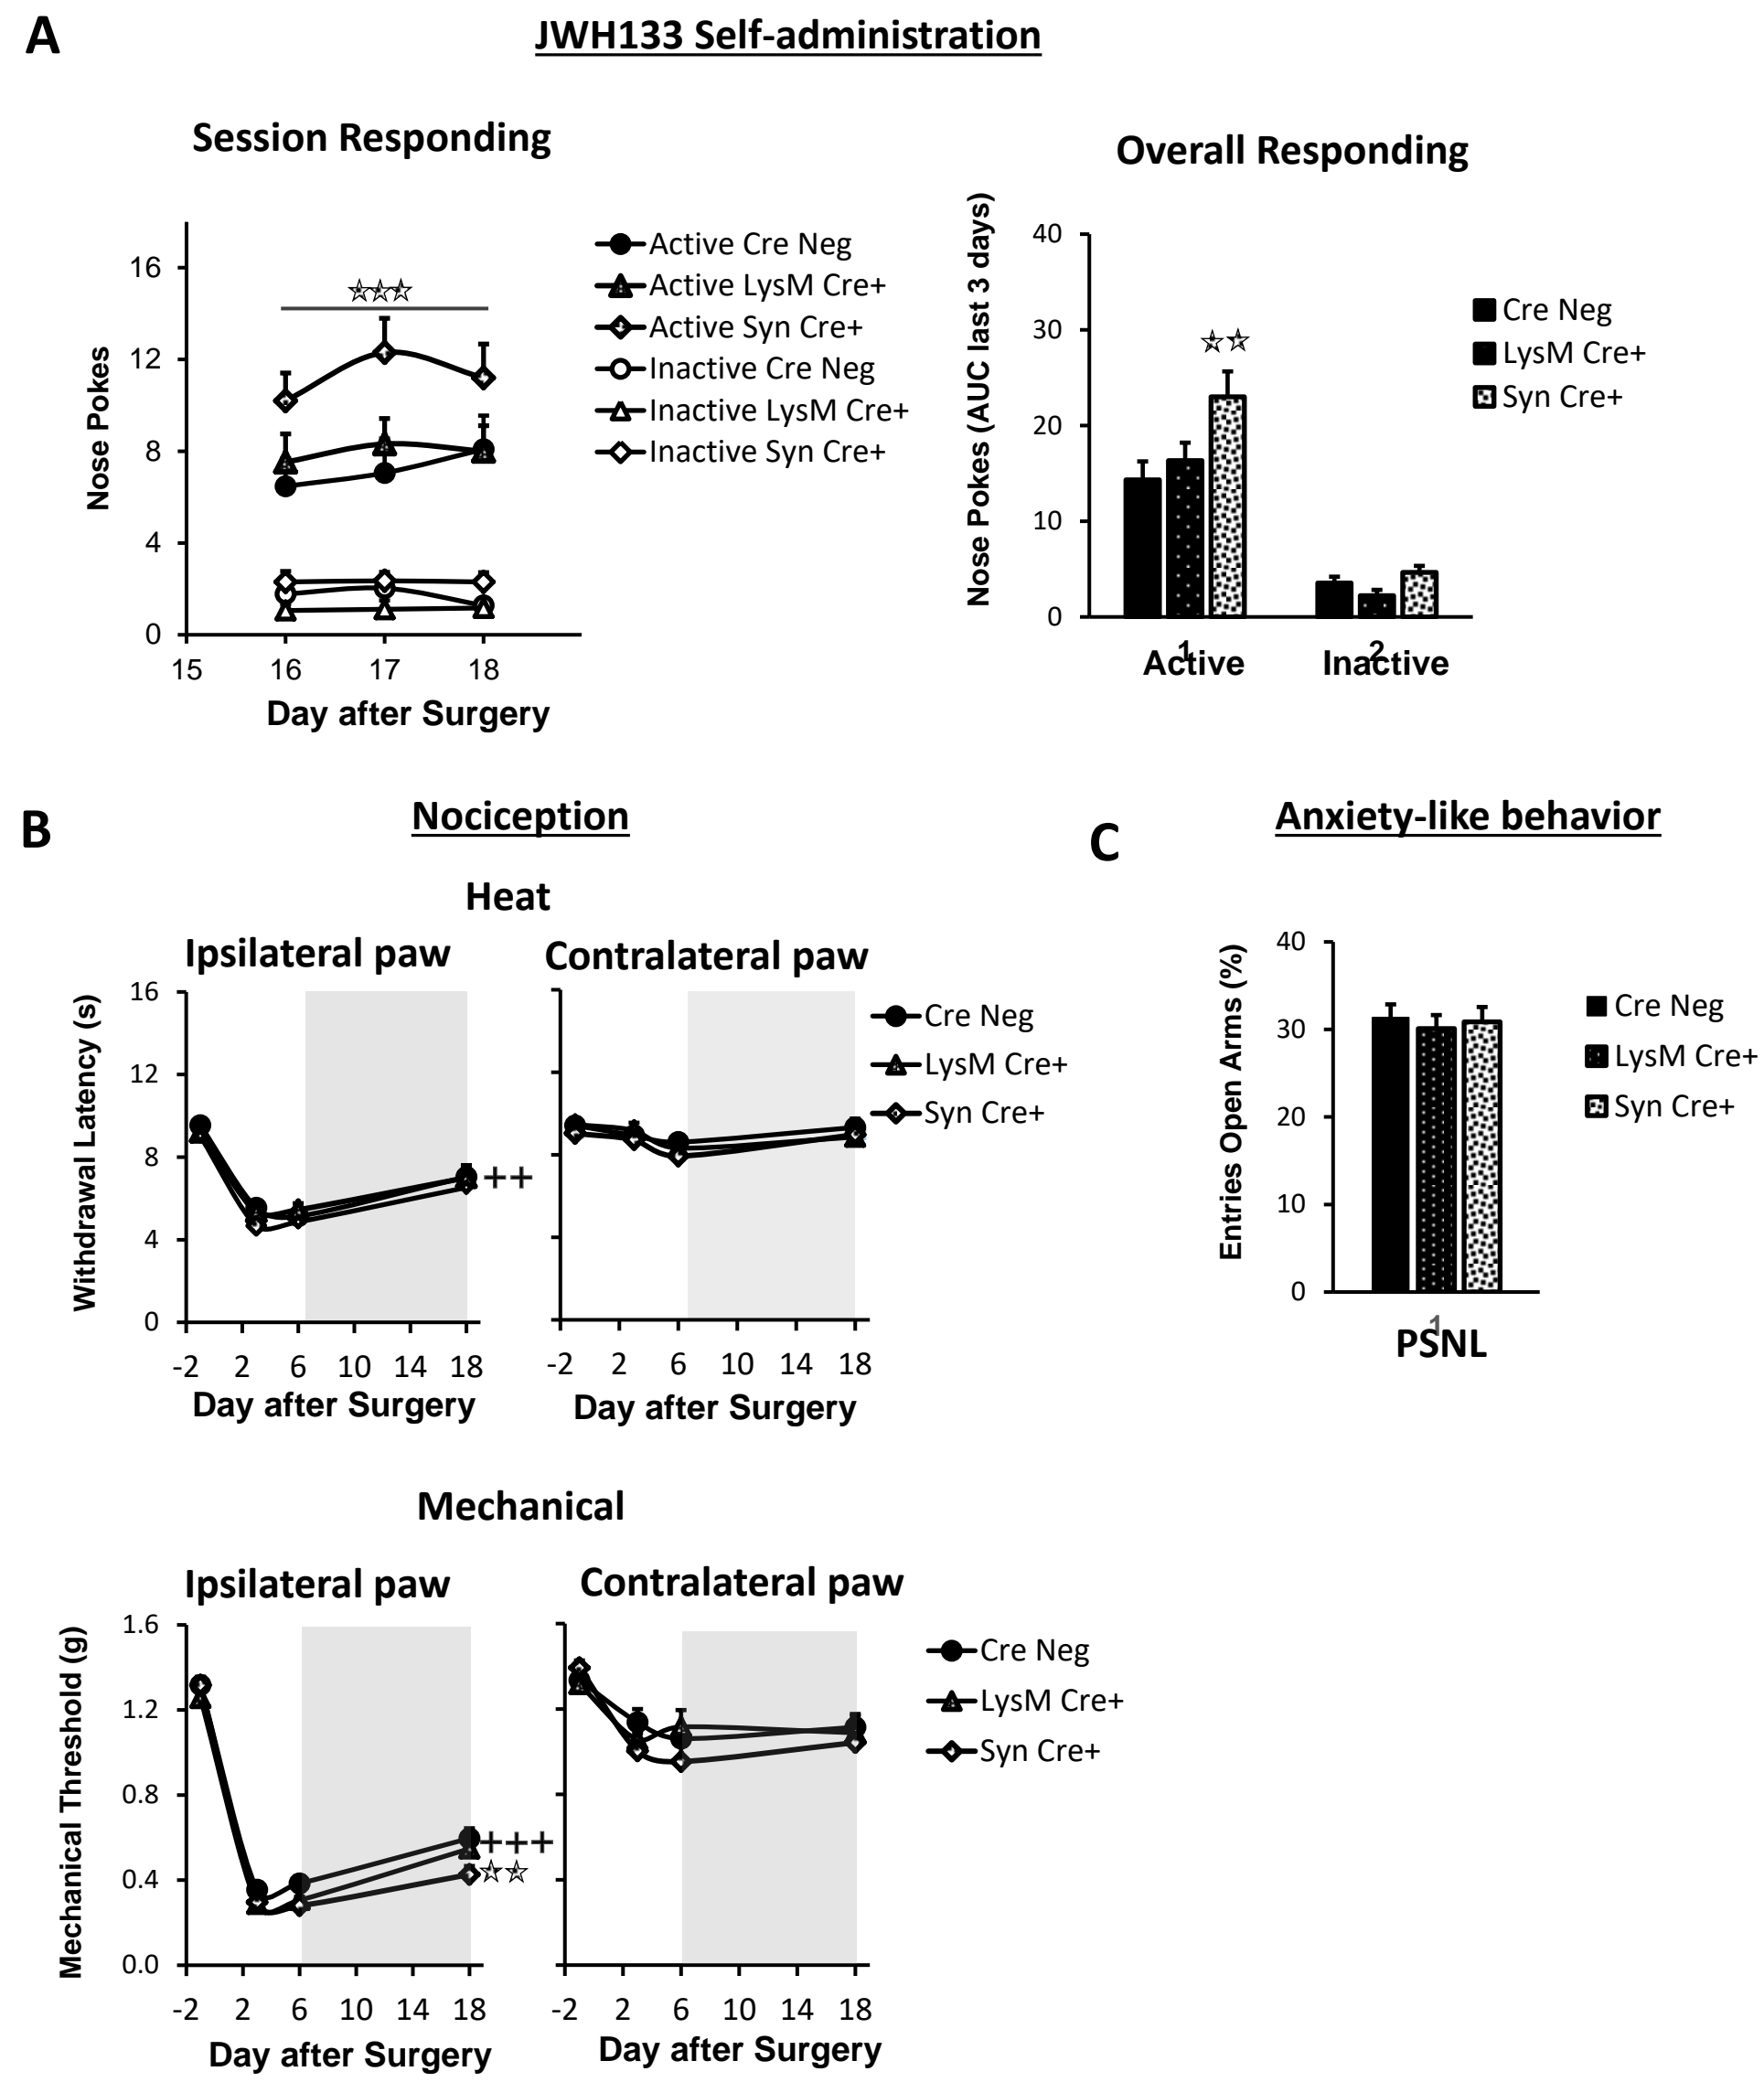



Figure 4

**A** Non-neuronal CB2r-GFP+ cells in the Dorsal Root Ganglia

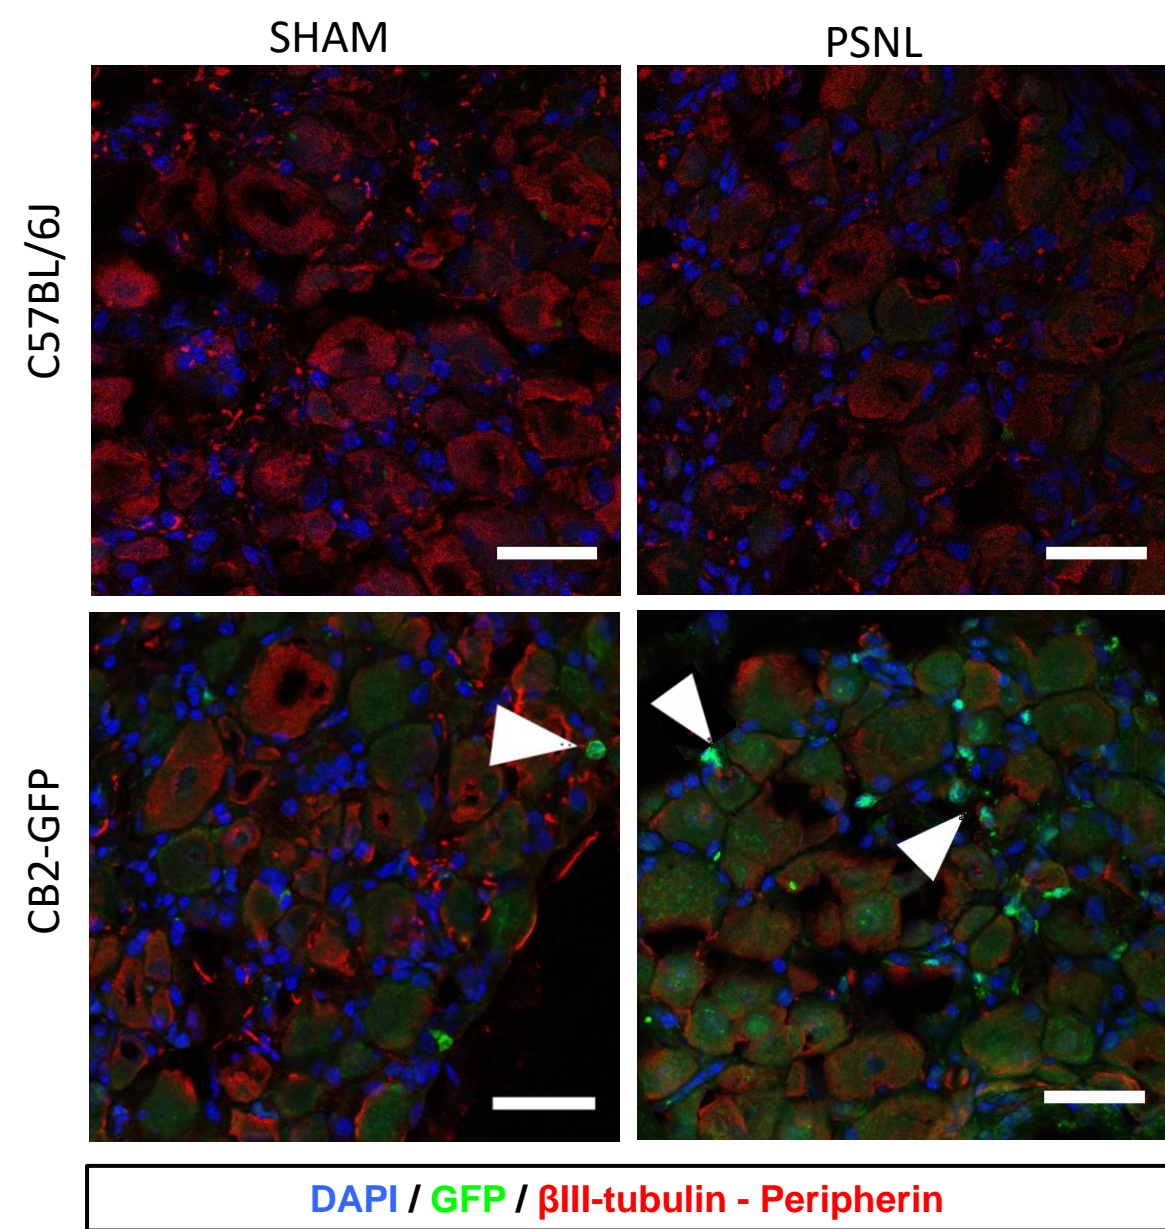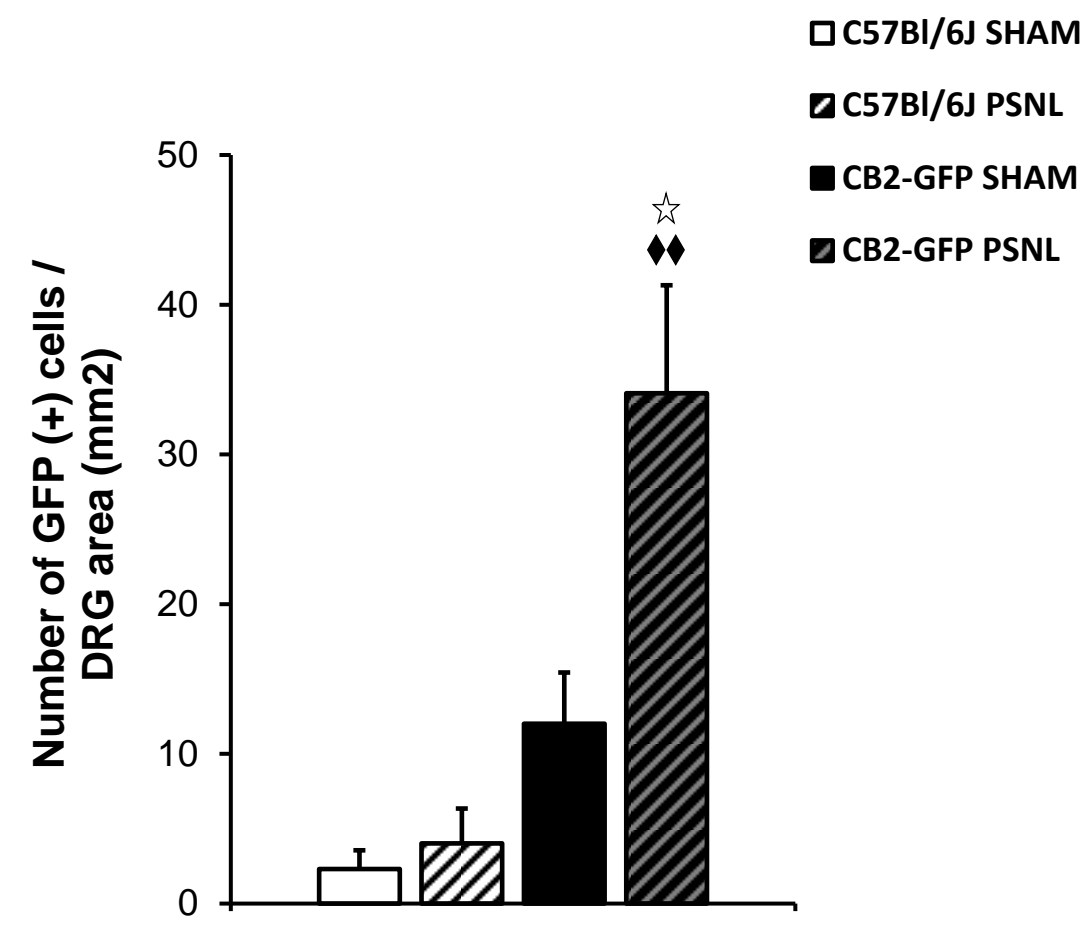

**B** Macrophages

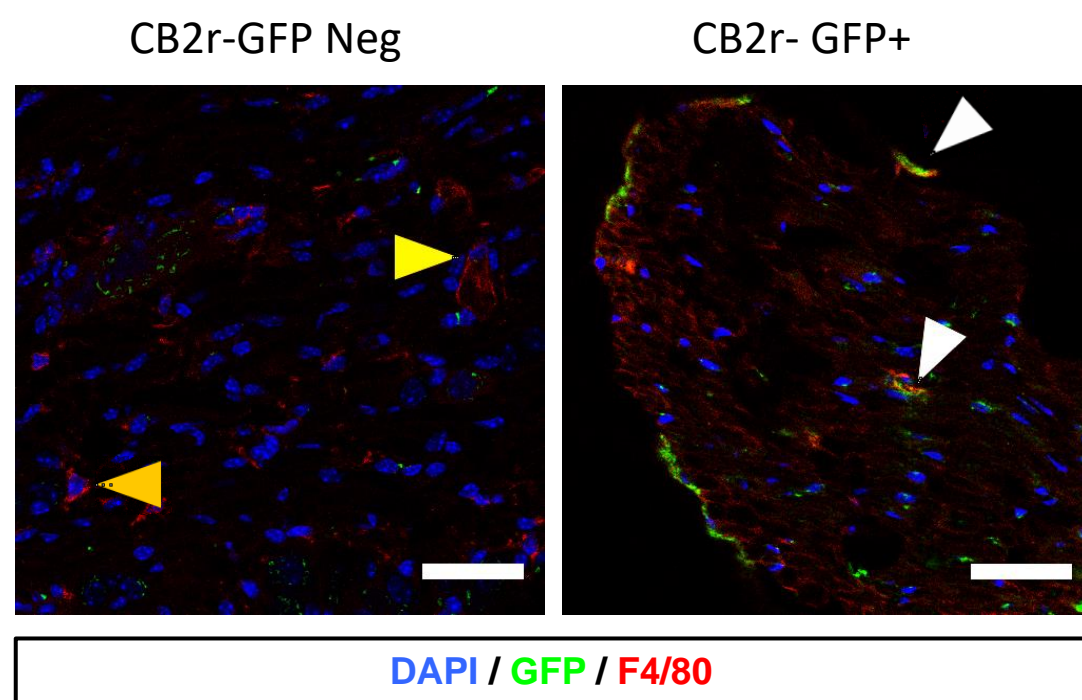

**C** Lymphocytes

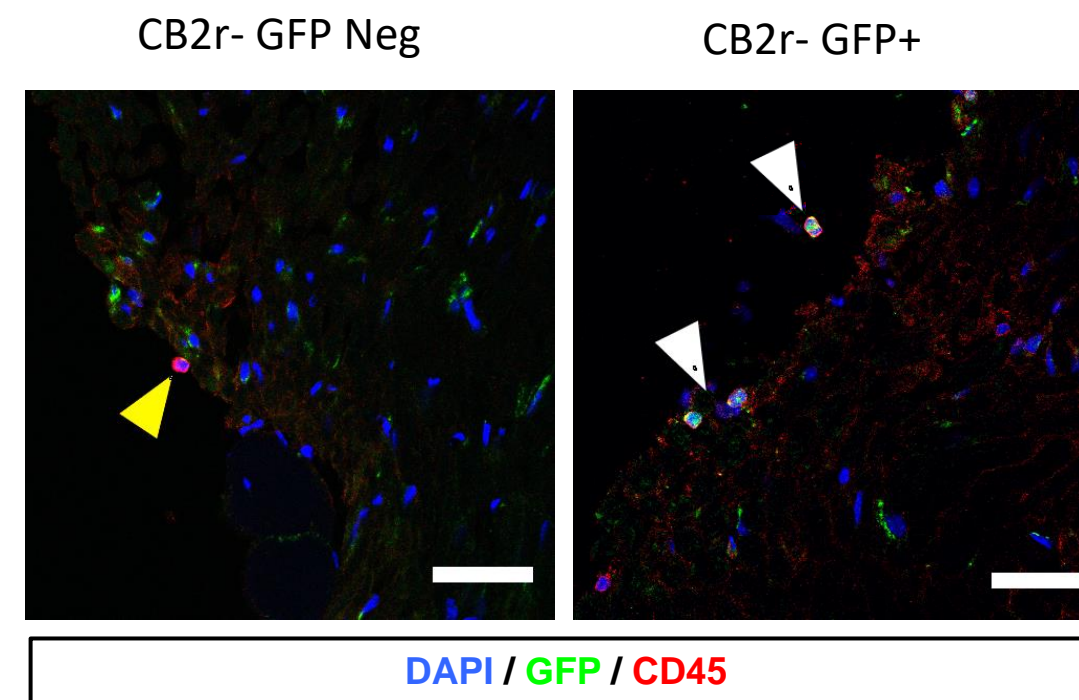

**D** CB2r-GFP in Dorsal Root Ganglia Neurons

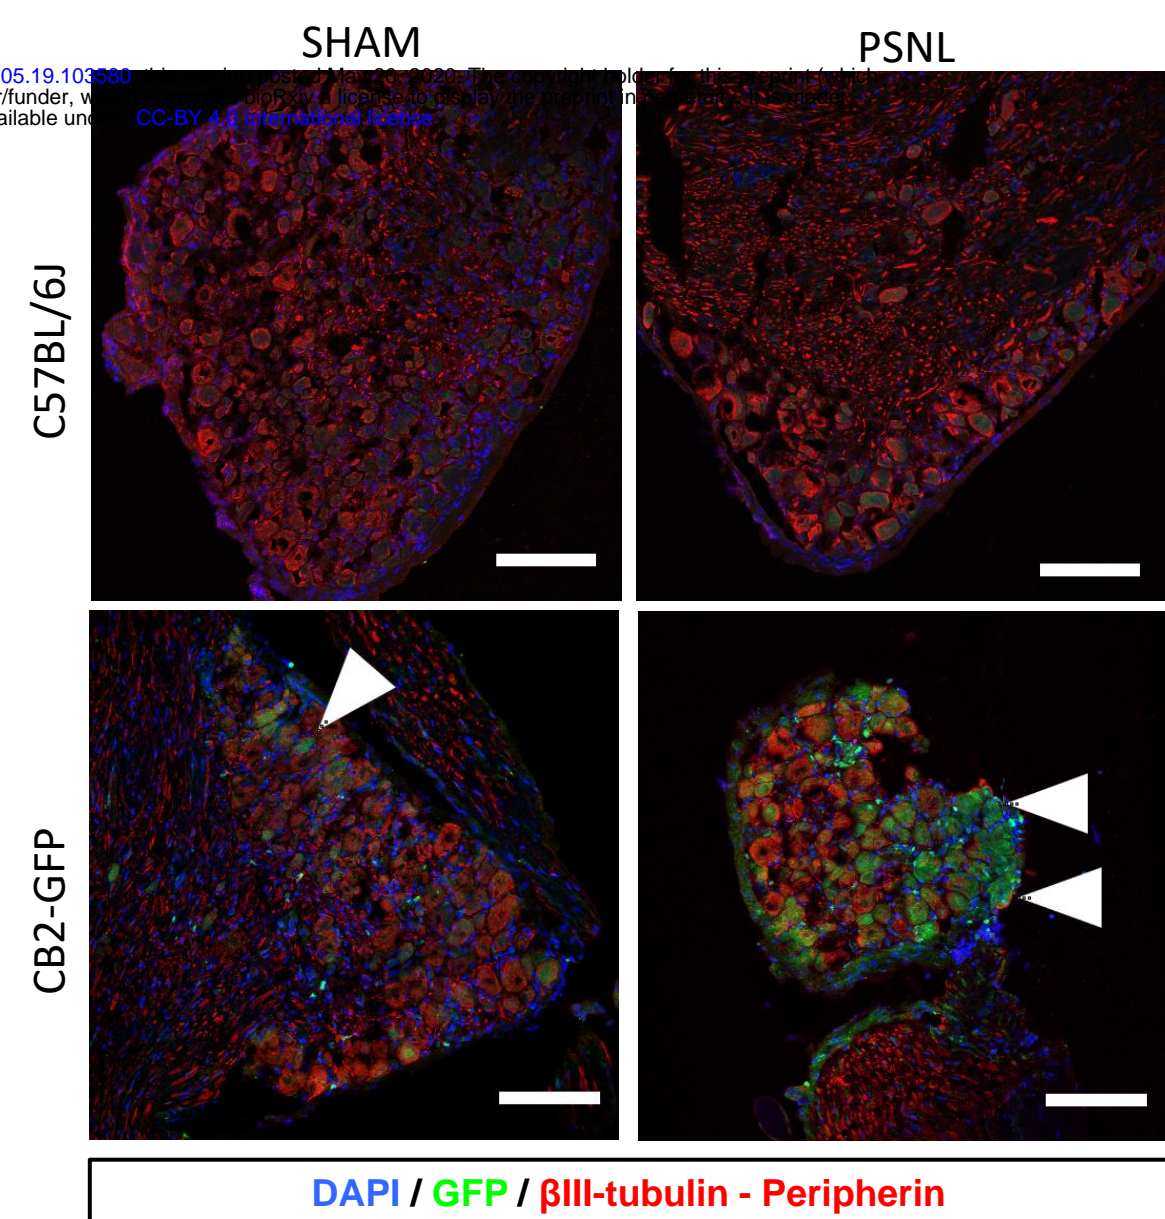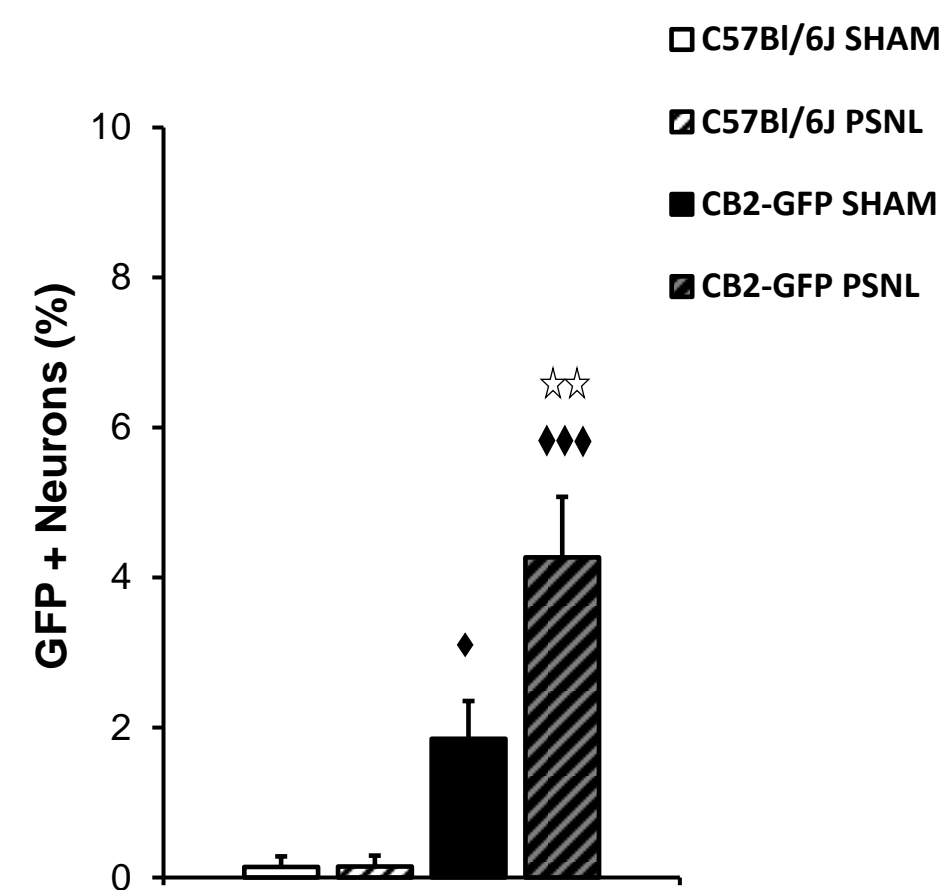



Figure 5

A

**JWH133 Self-administration**

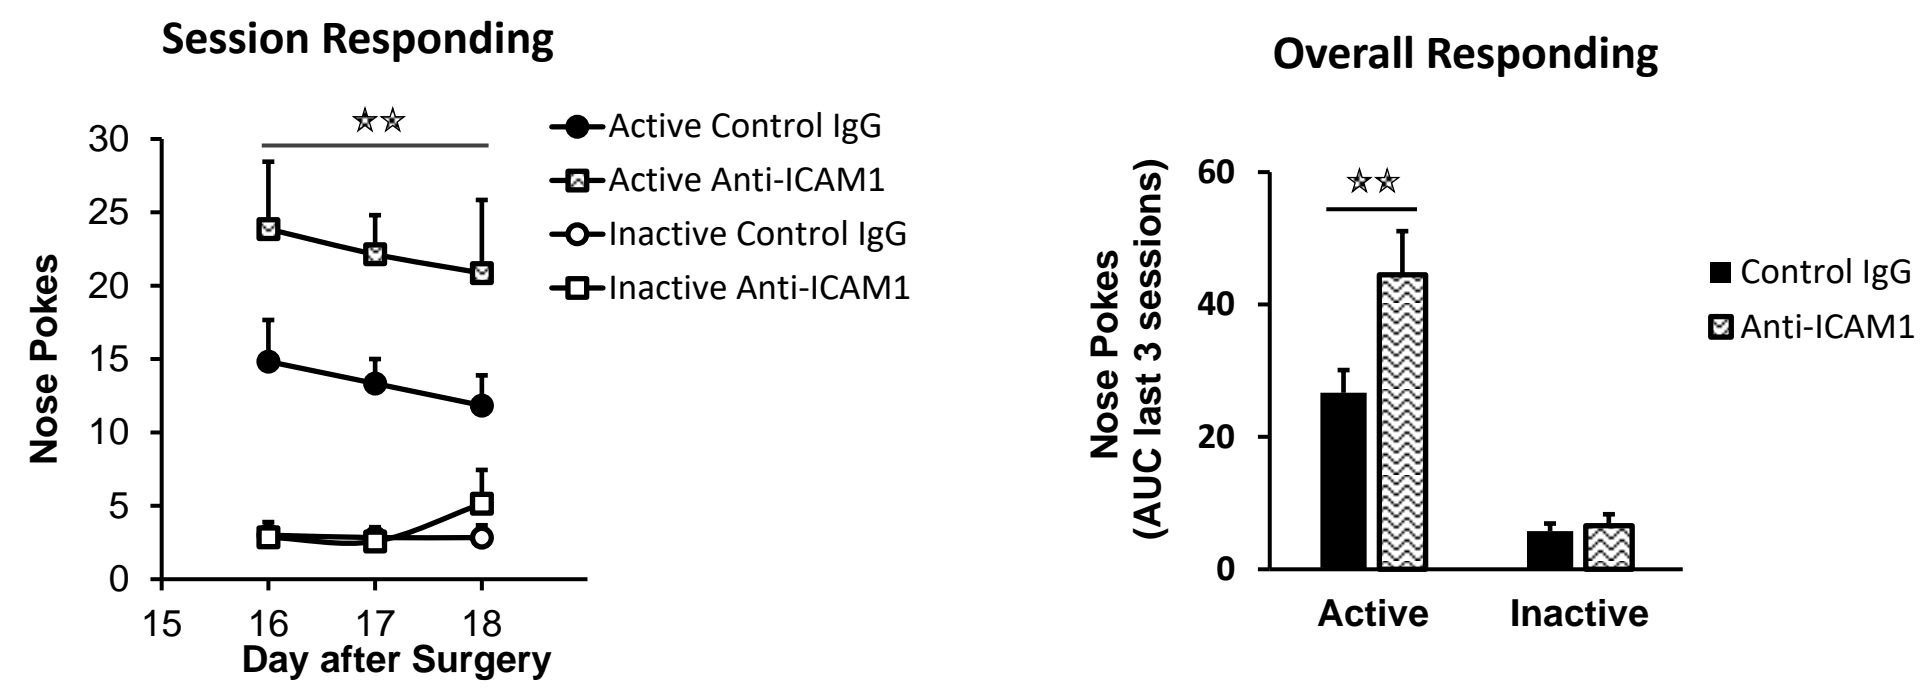

B

**Nociception**

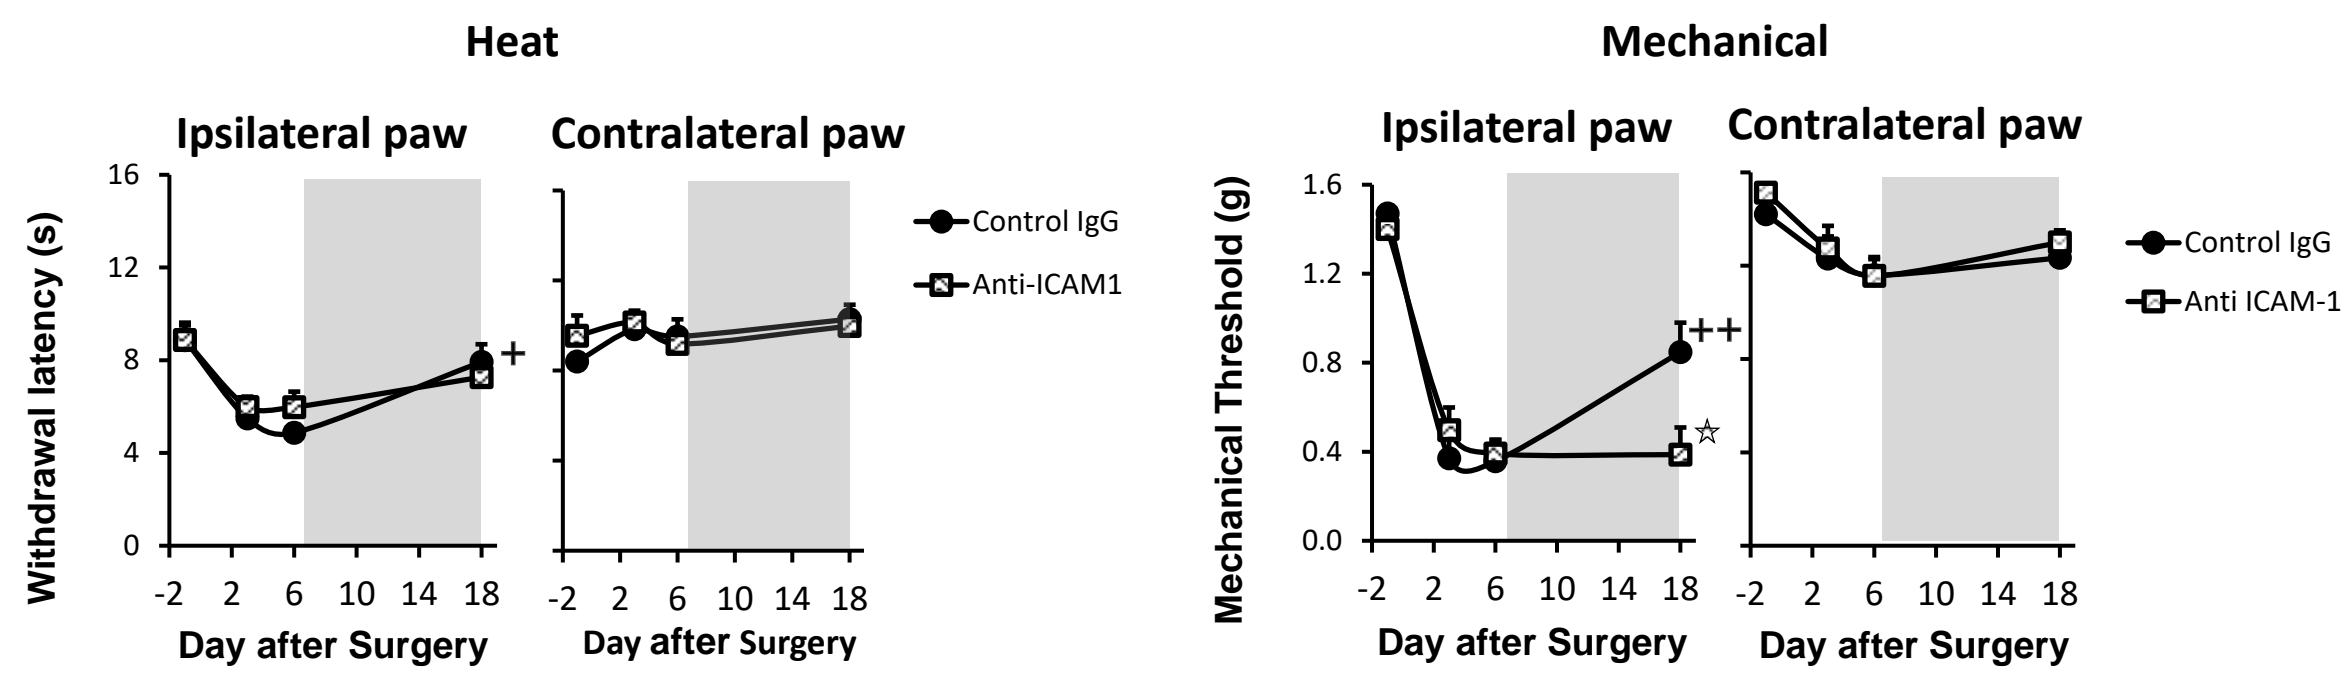

C

**Anxiety-like behavior**

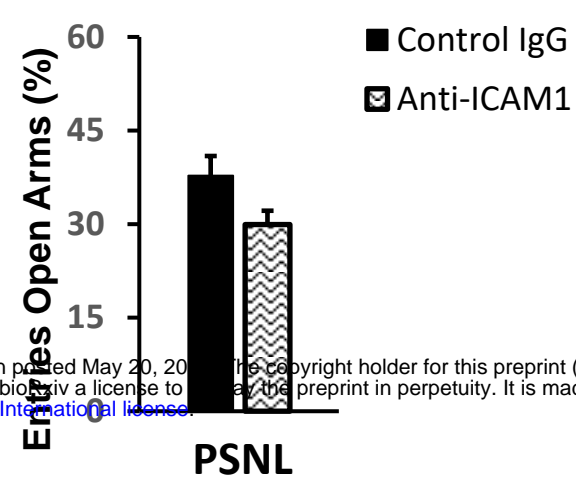

D

**DRG mRNA**

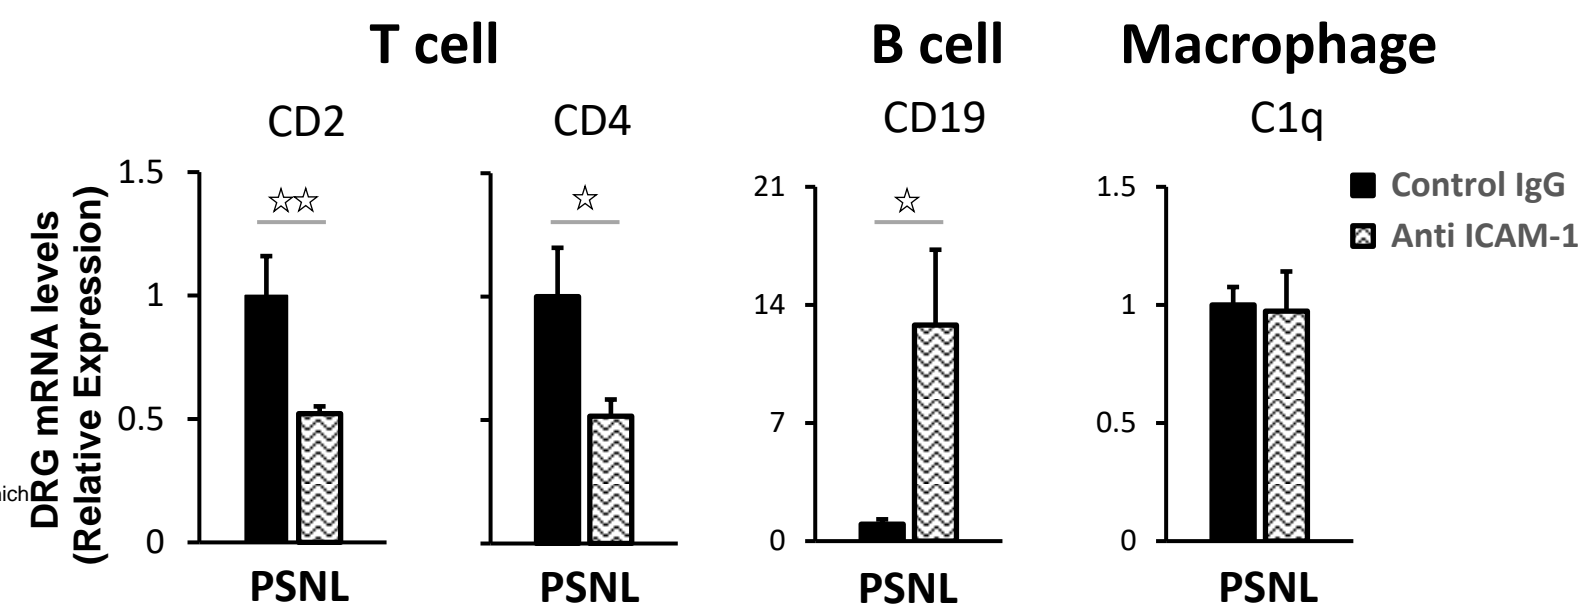

Figure 1-figure supplement 1

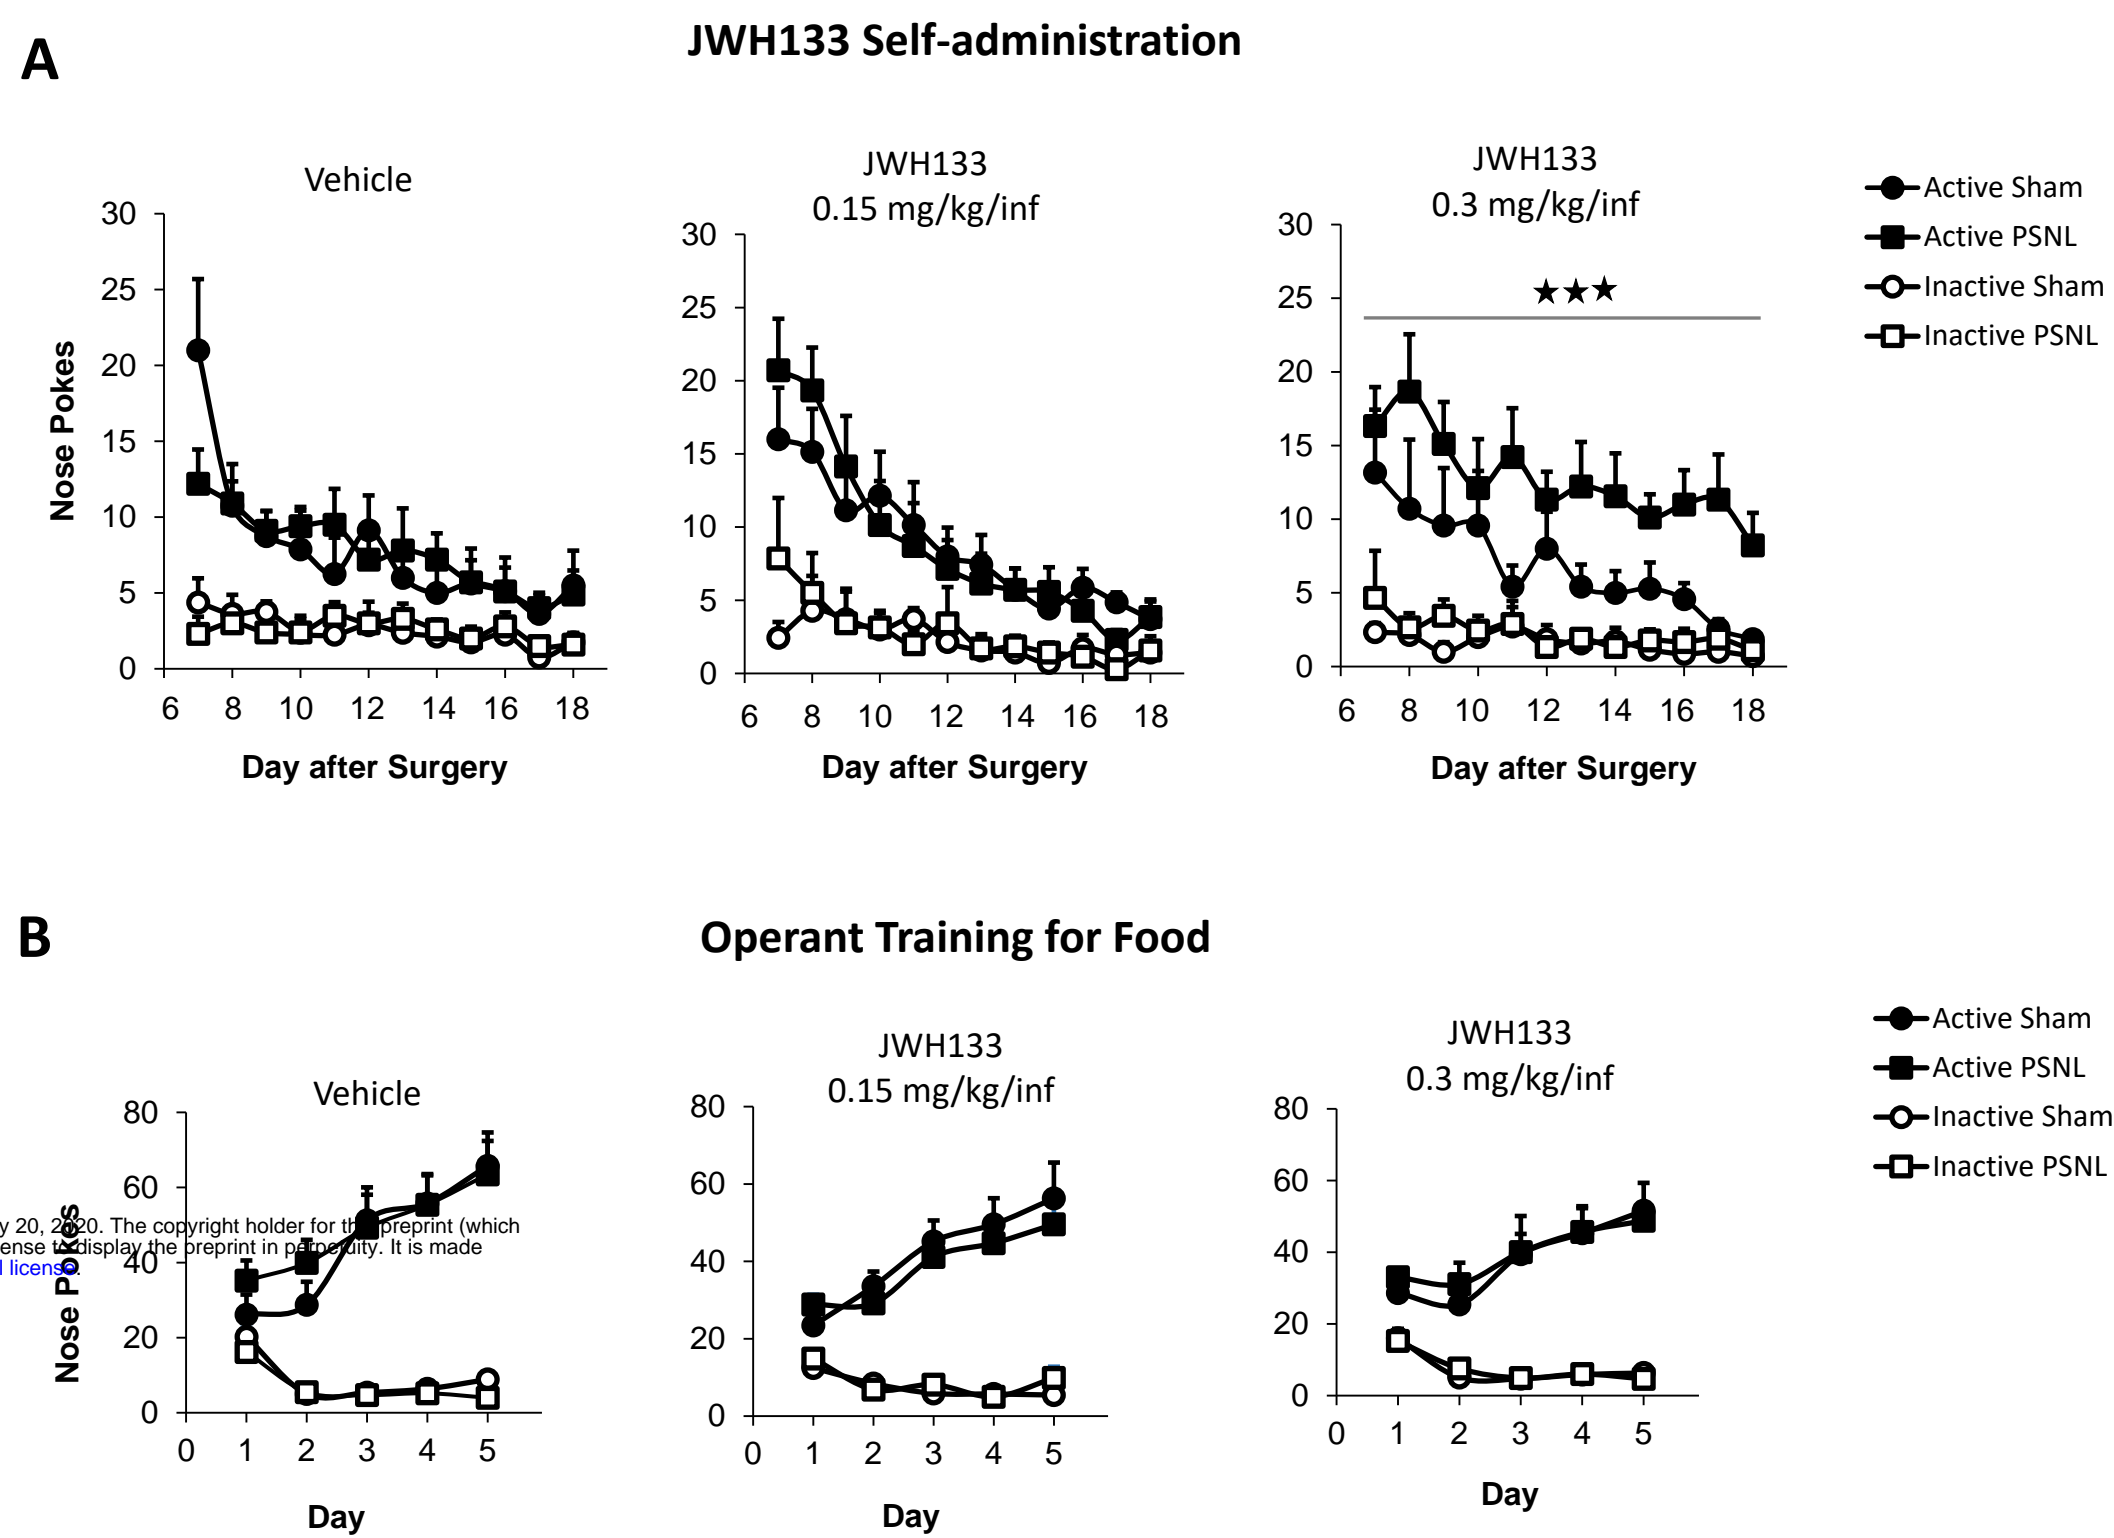

Figure 2-figure supplement 1

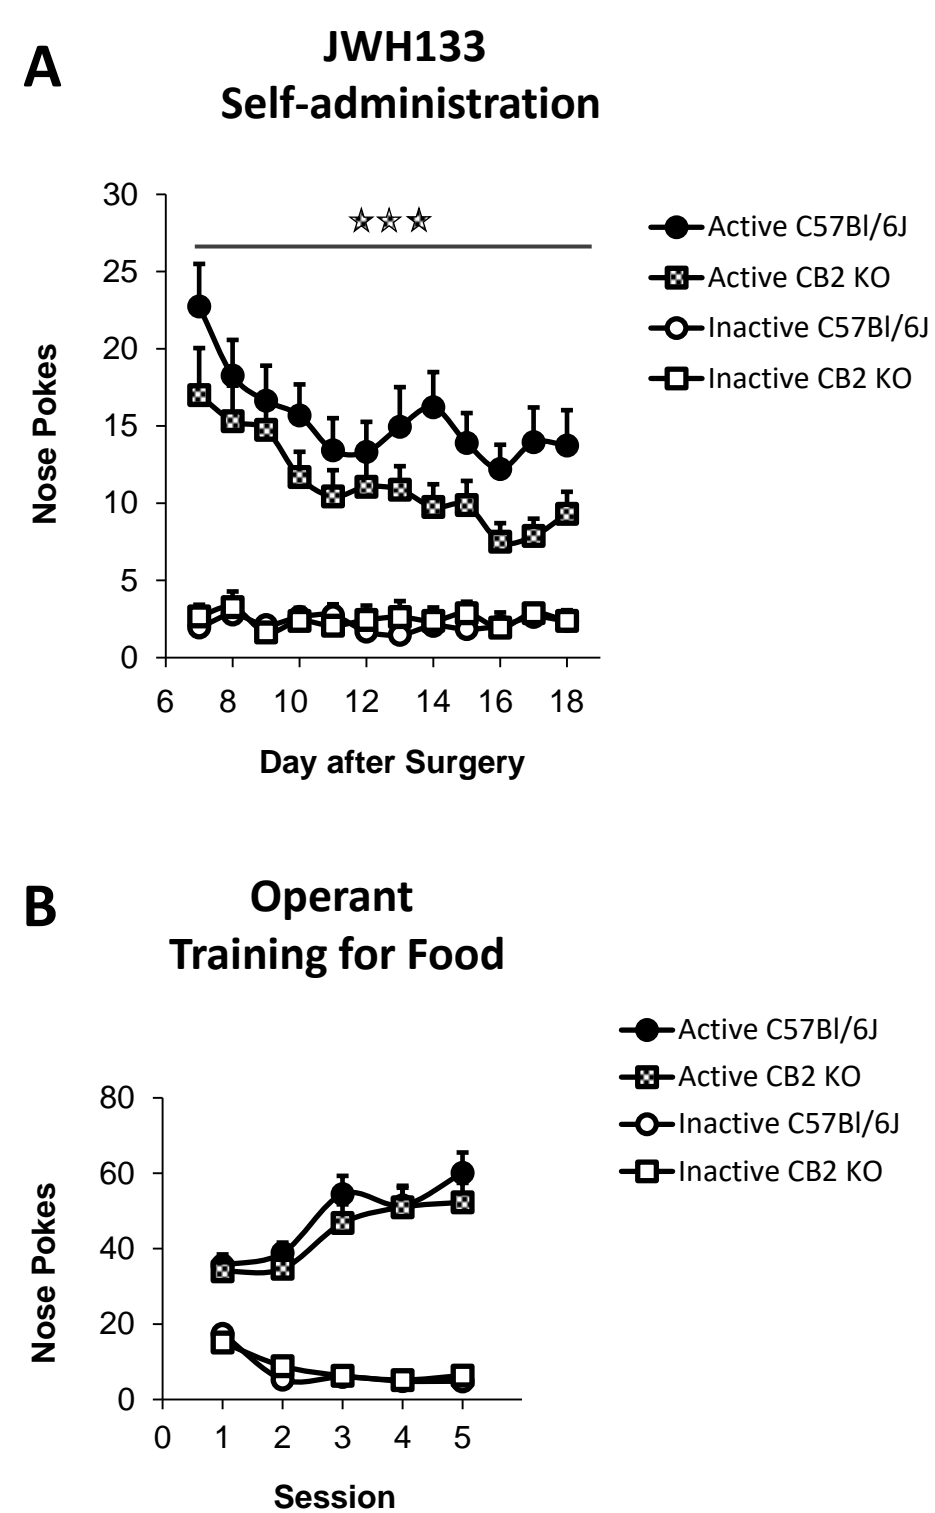

Figure 3-figure supplement 1

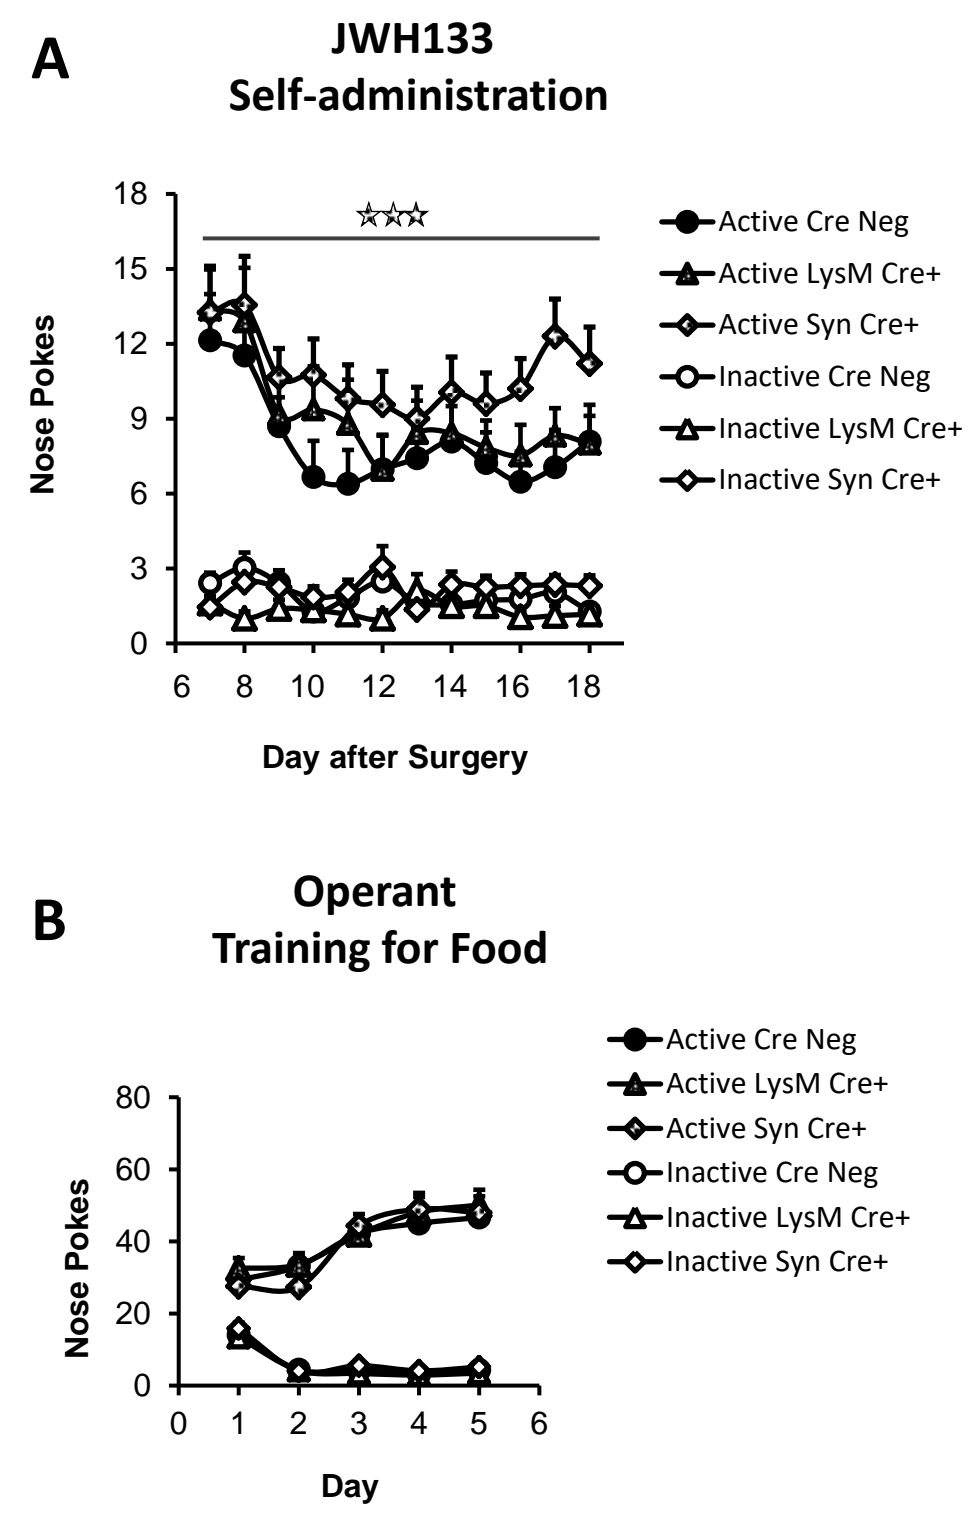

Figure 4-figure supplement 1

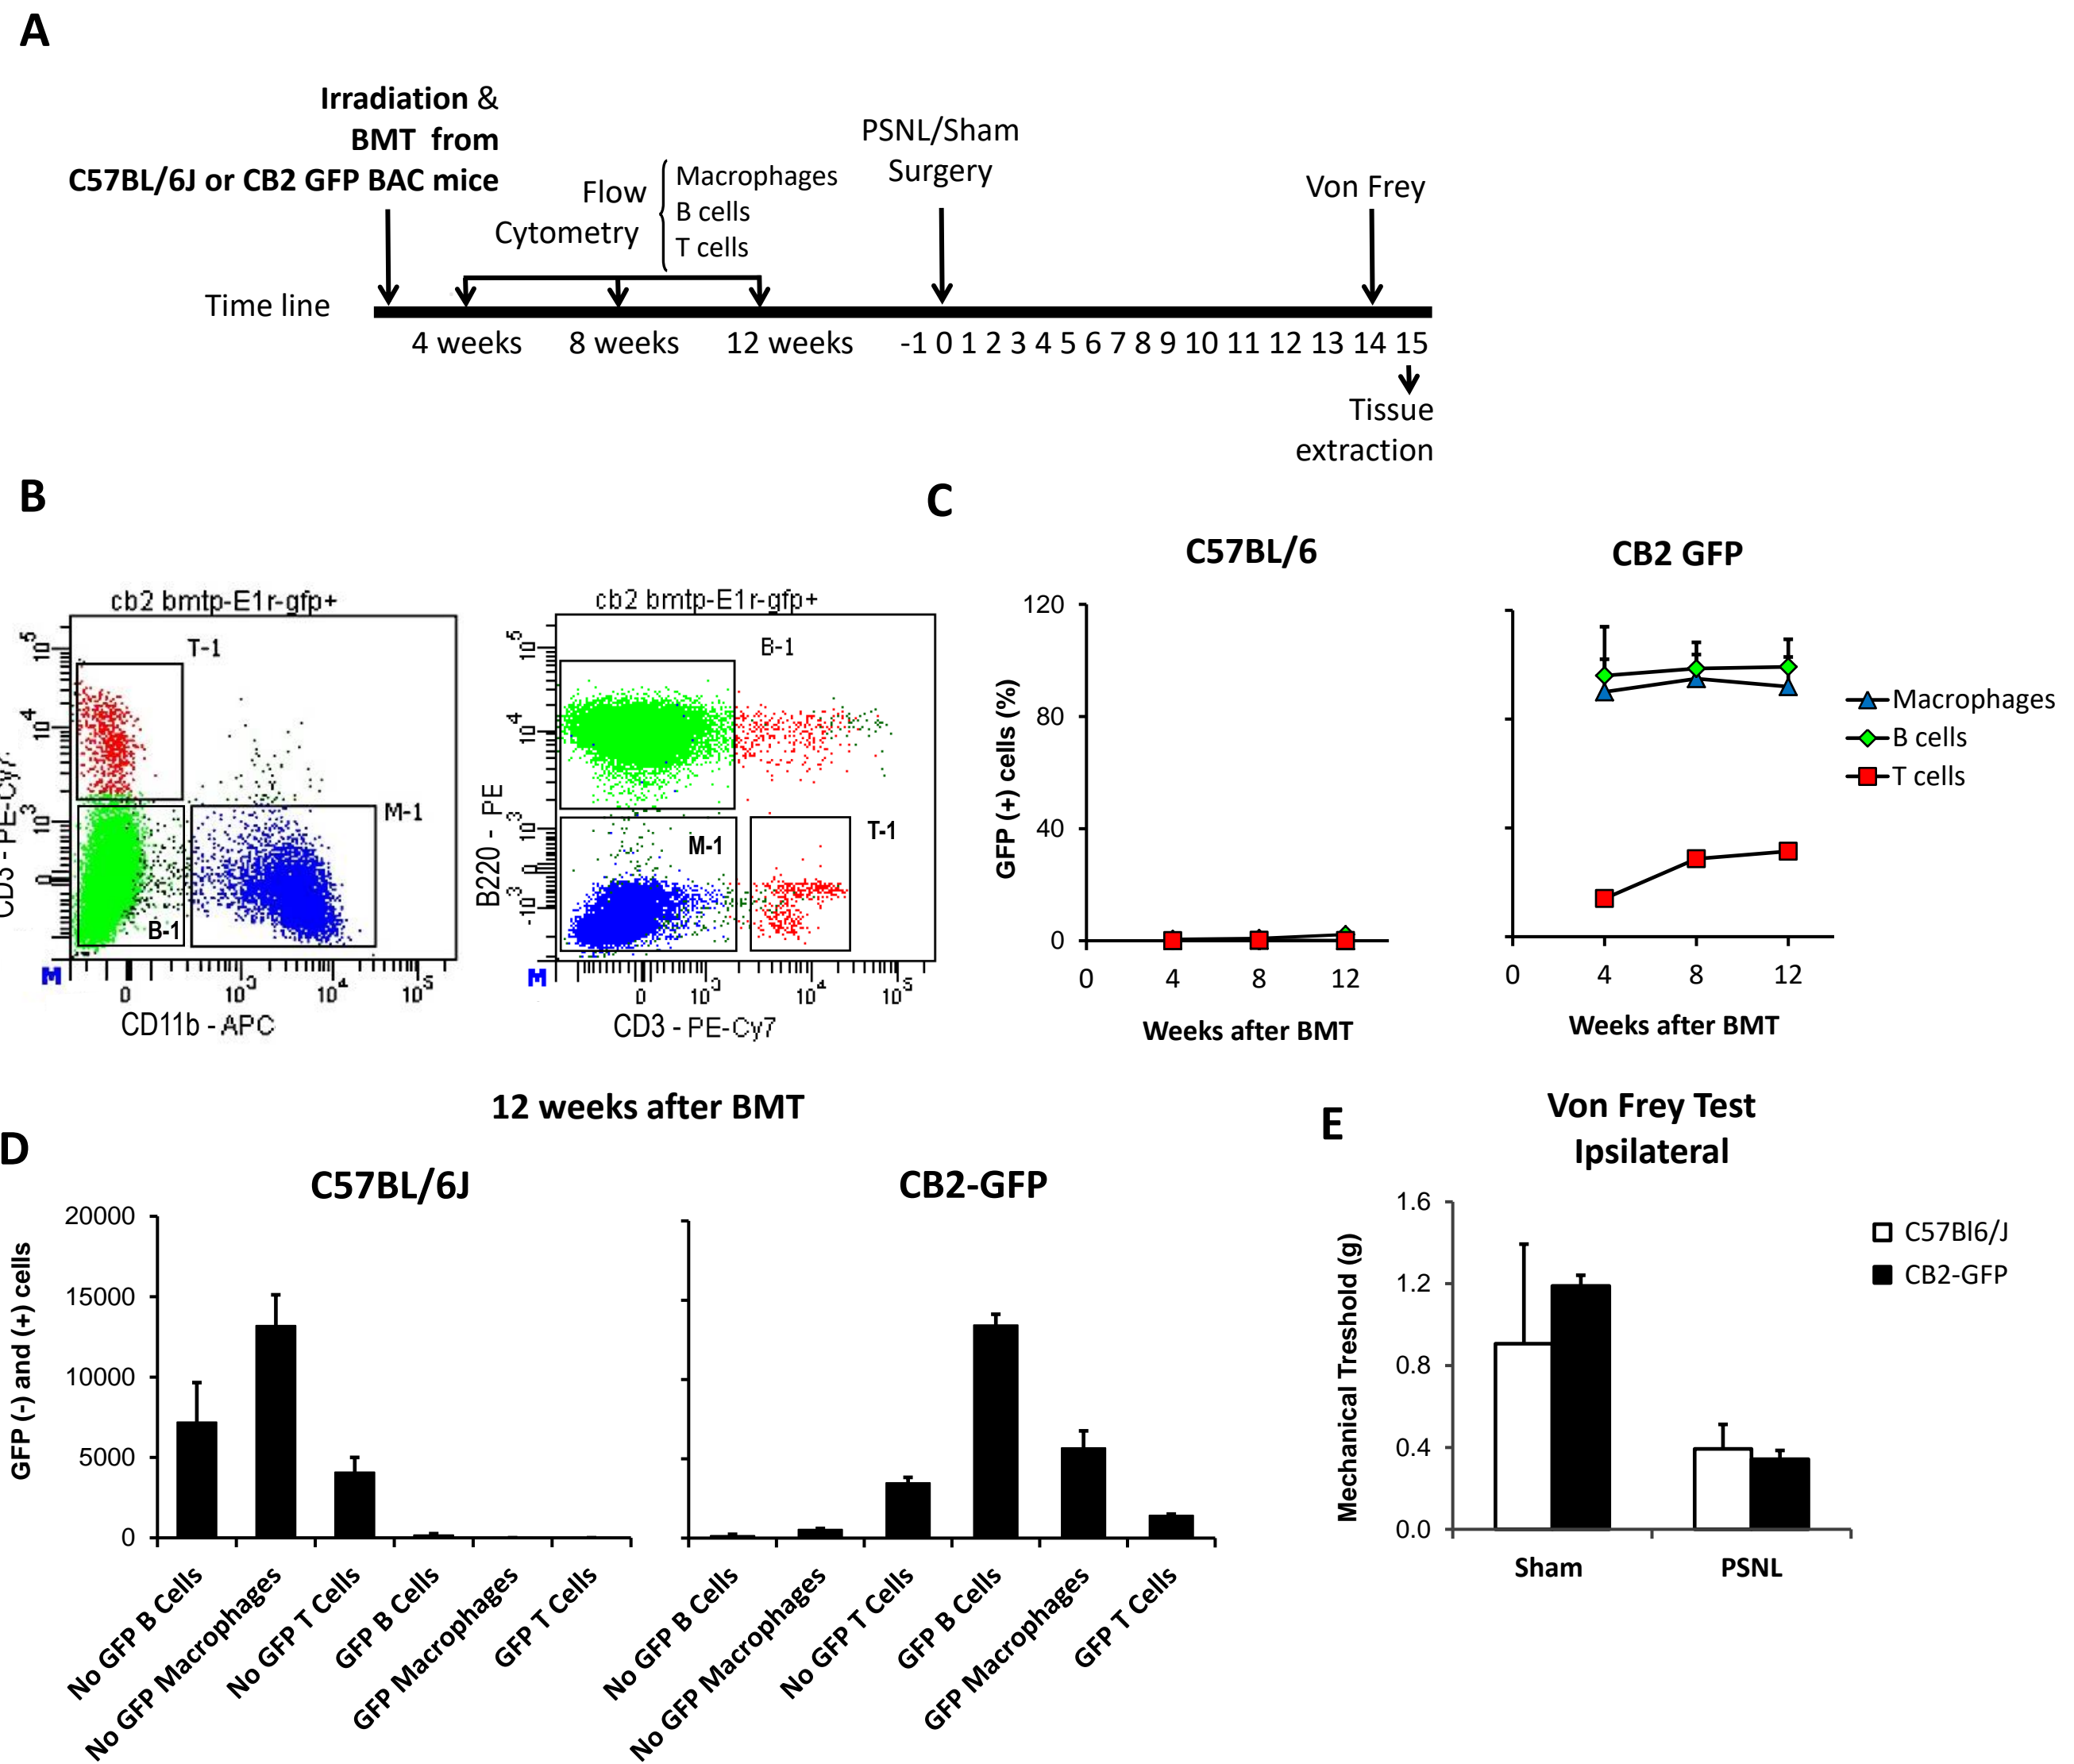



Figure 4-figure supplement 2

Non-neuronal CB2r-GFP+ cells in the Dorsal Root Ganglia

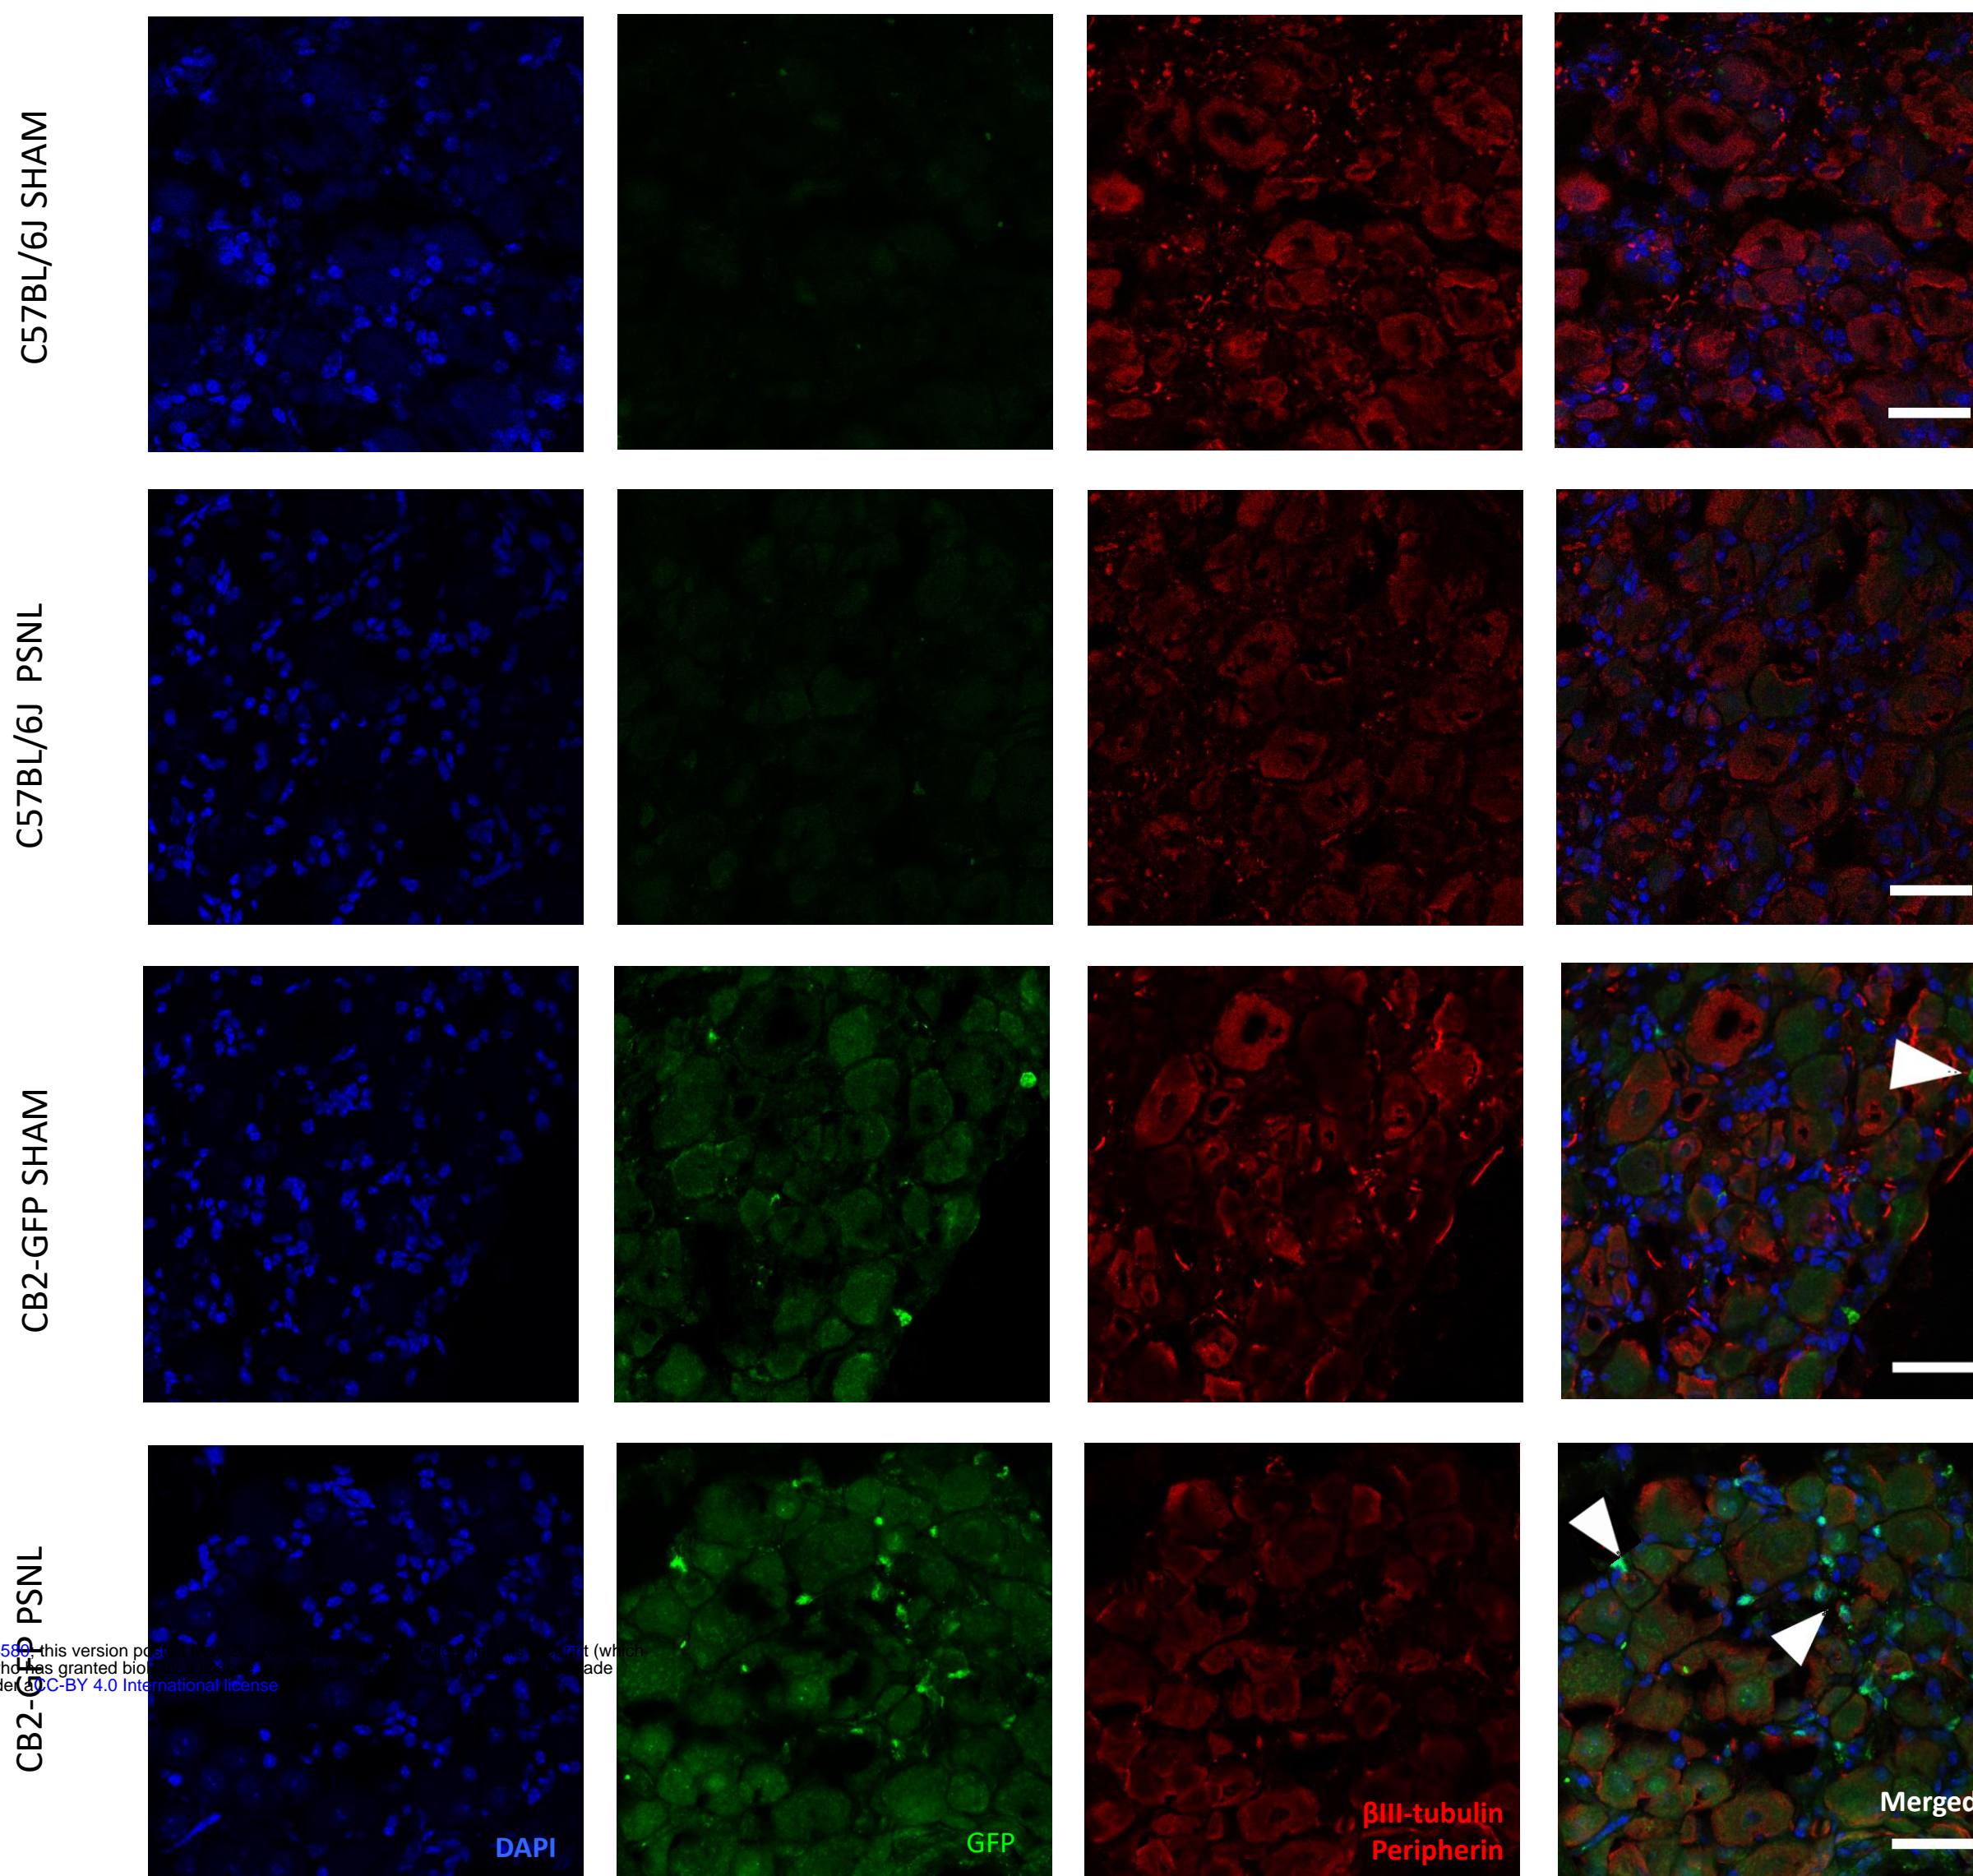



Figure 4-figure supplement 3

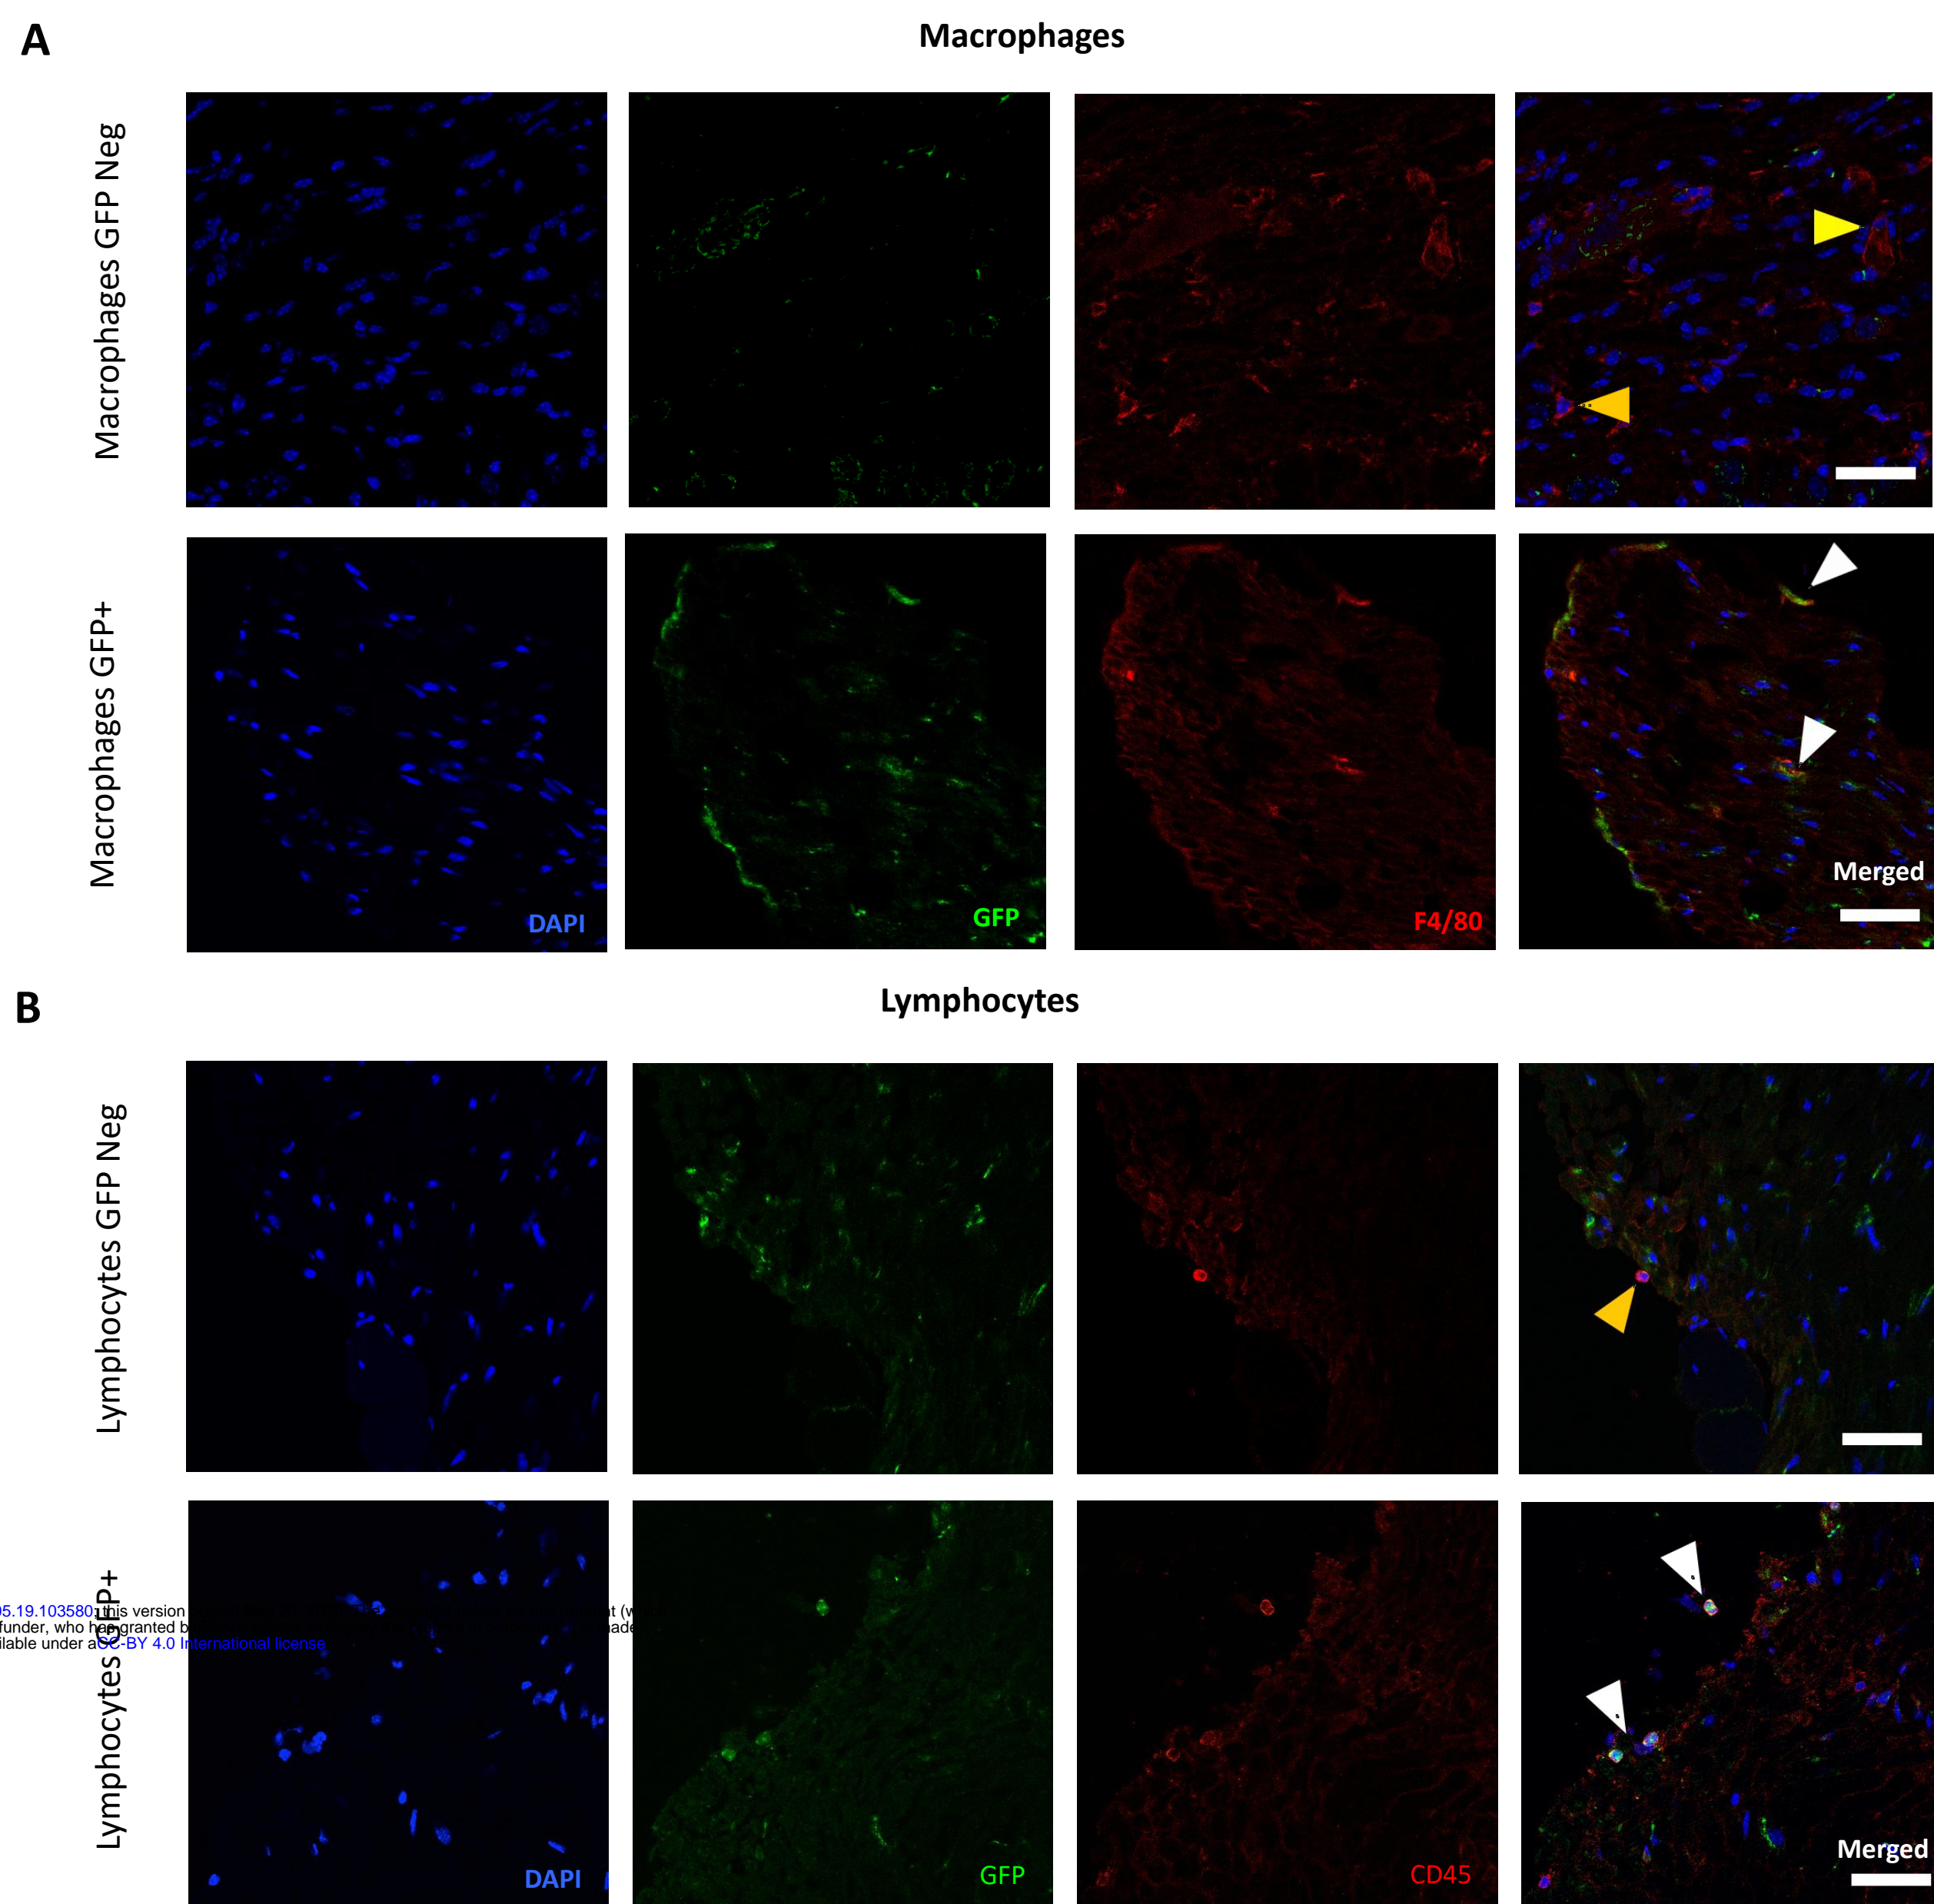



Figure 4-figure supplement 4

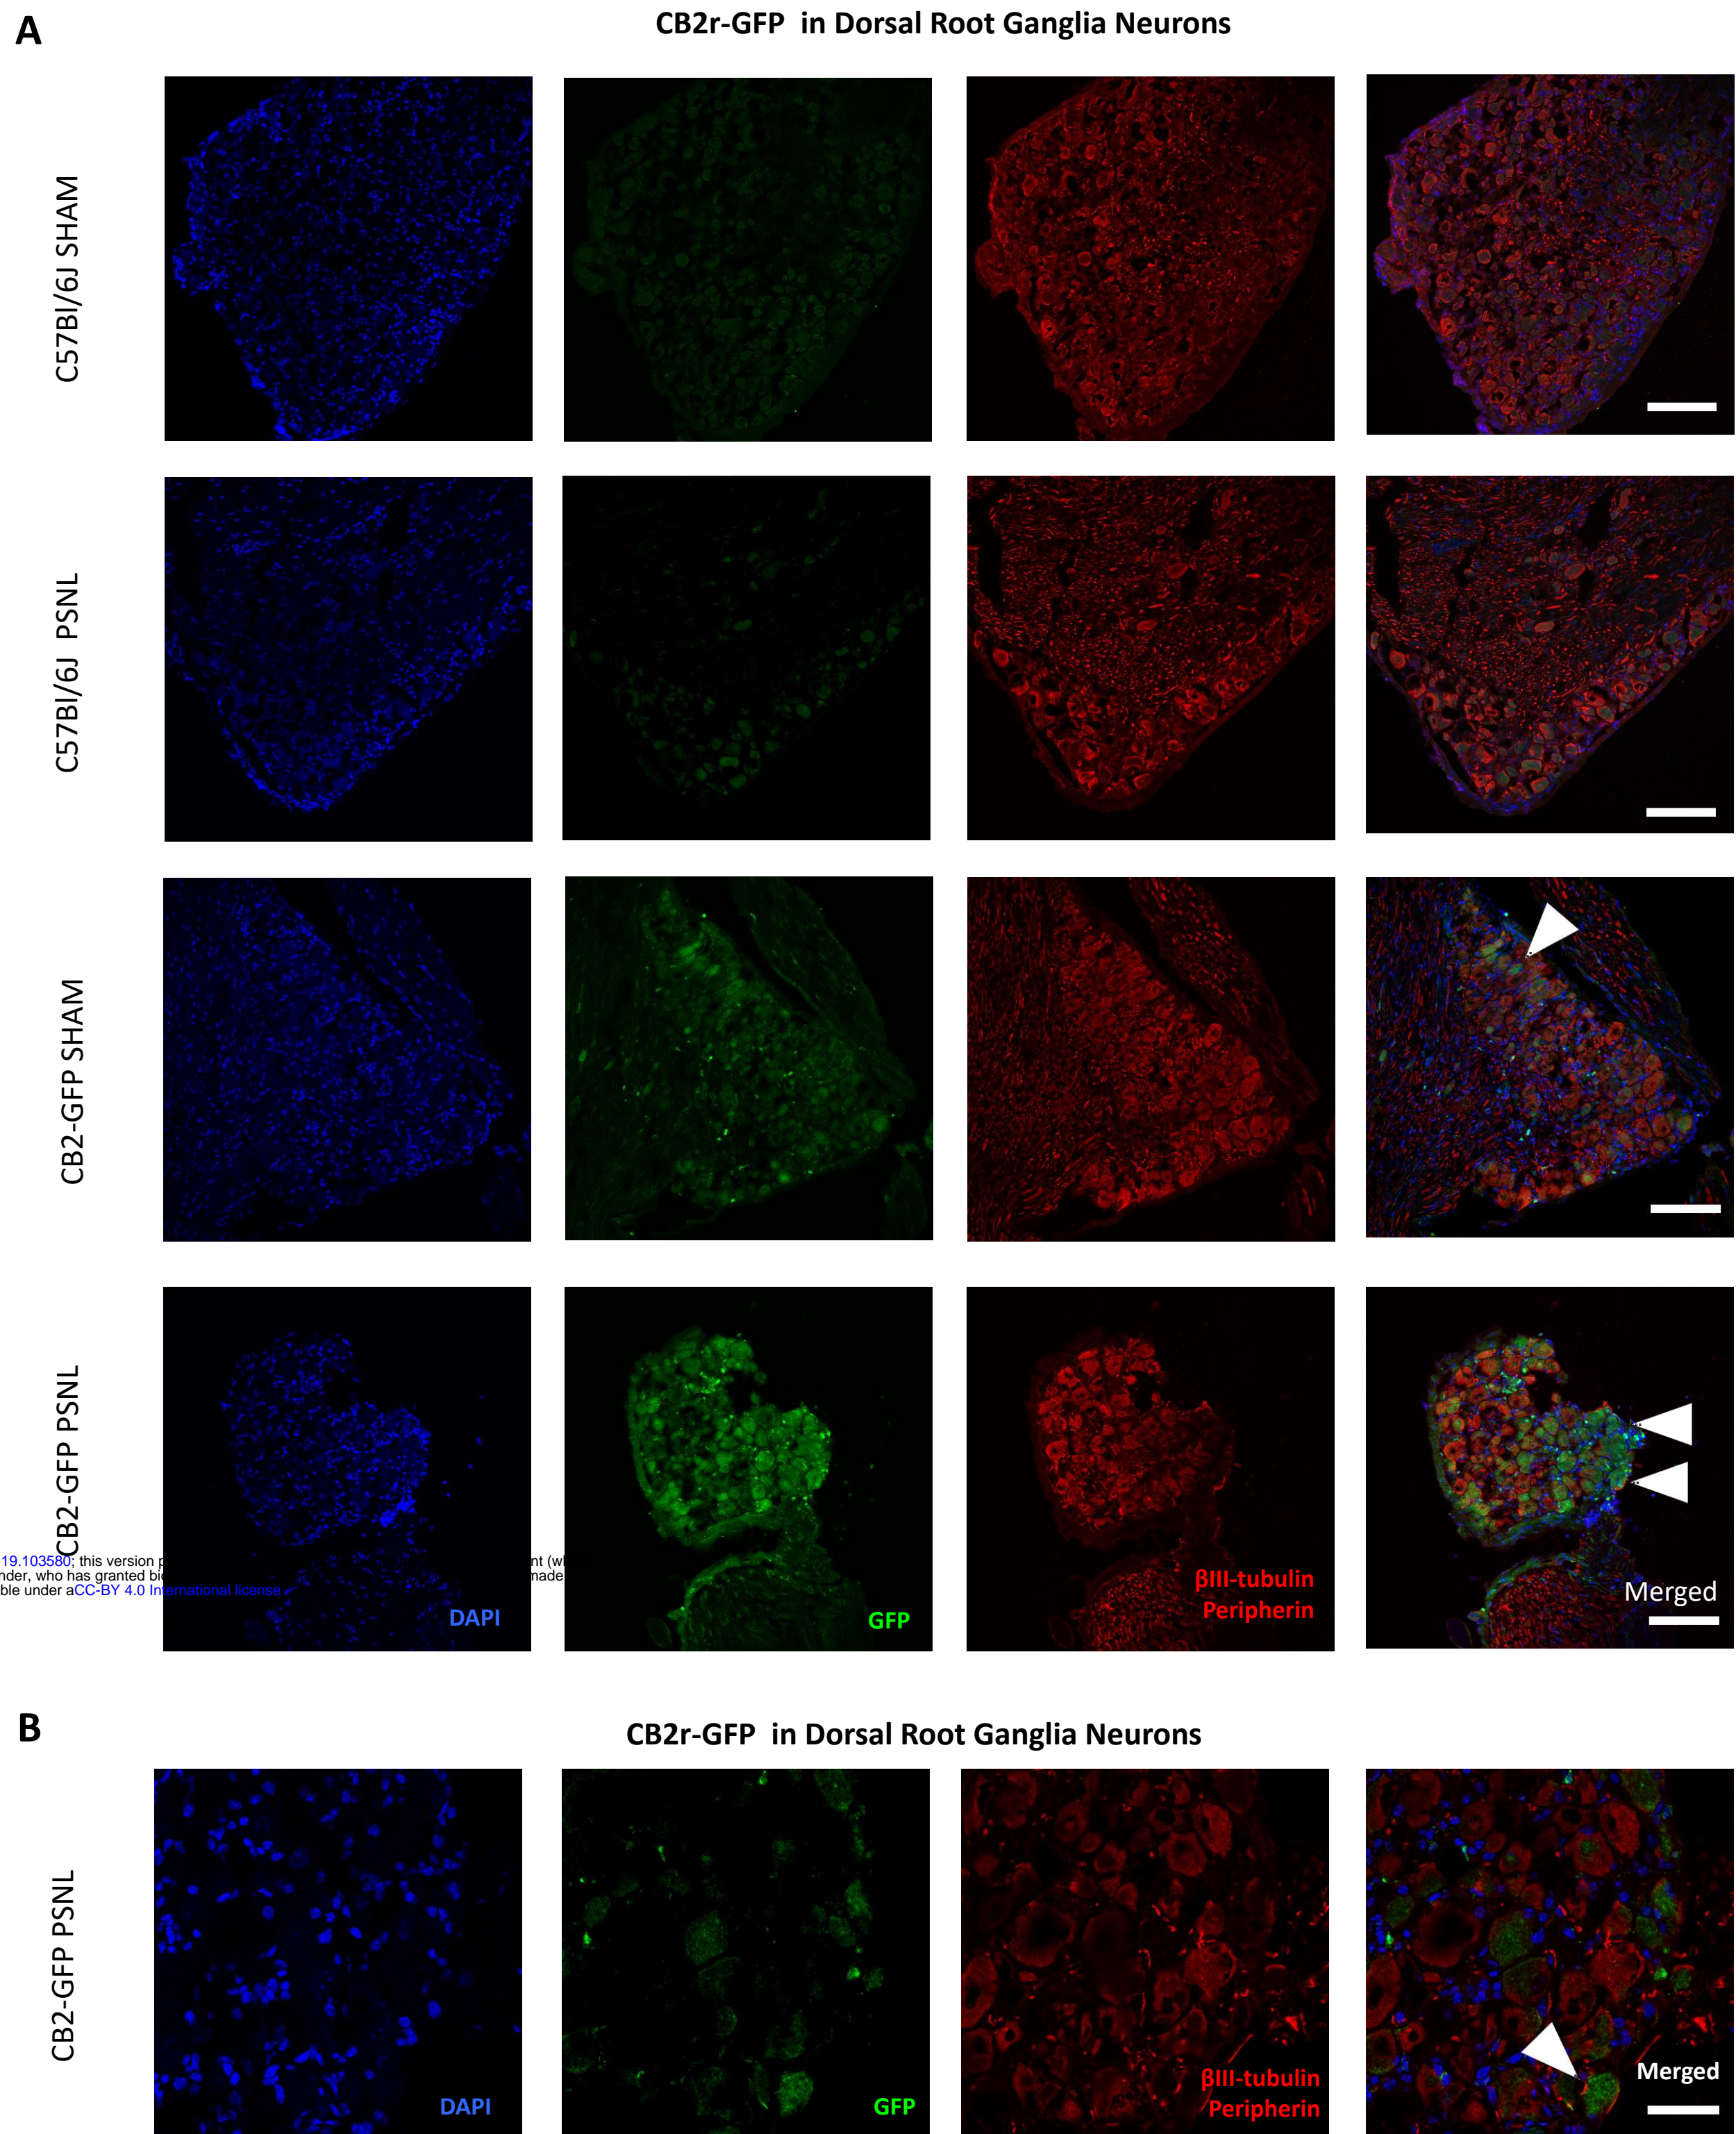



Figure 5-figure supplement 1

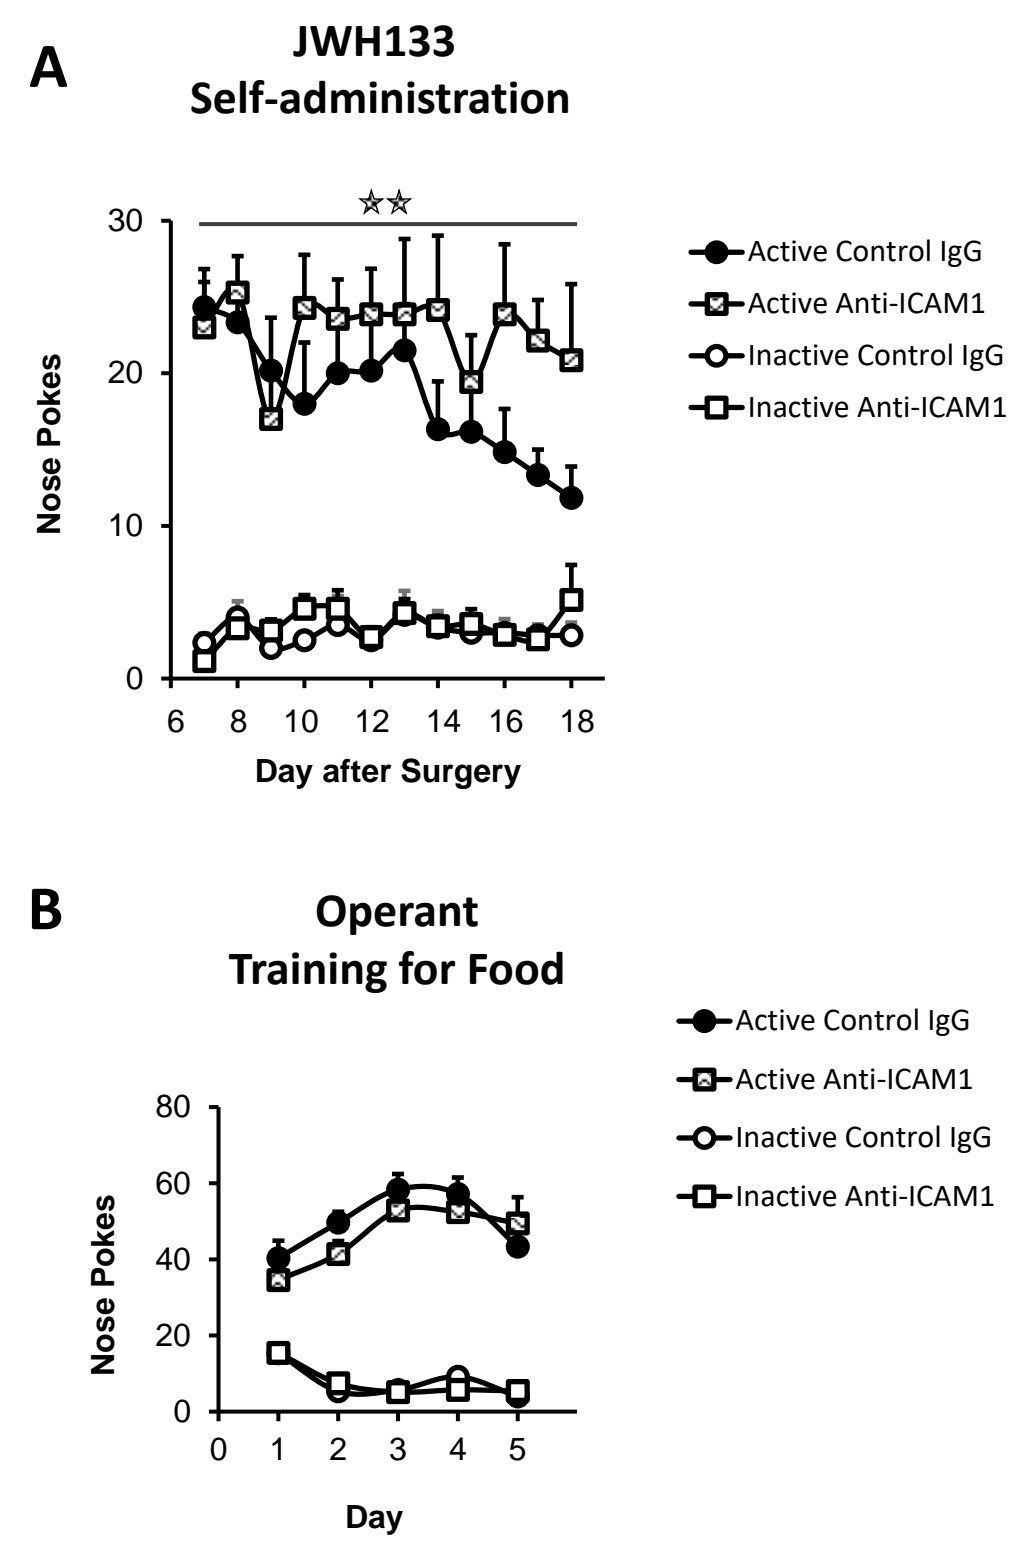

Source: https://www.biorxiv.org/content/10.1101/2020.05.19.103580v1.full.pdf
